# Supplementary material for: Deciphering the role of IL17RA in psoriasis and chronic mucocutaneous candidiasis: shared pathways and distinct manifestations
Source: Frontiers journal article supplement (doi:10.3389/fimmu.2024.1516408), 2025-01-20

## Supplementary Figure 1

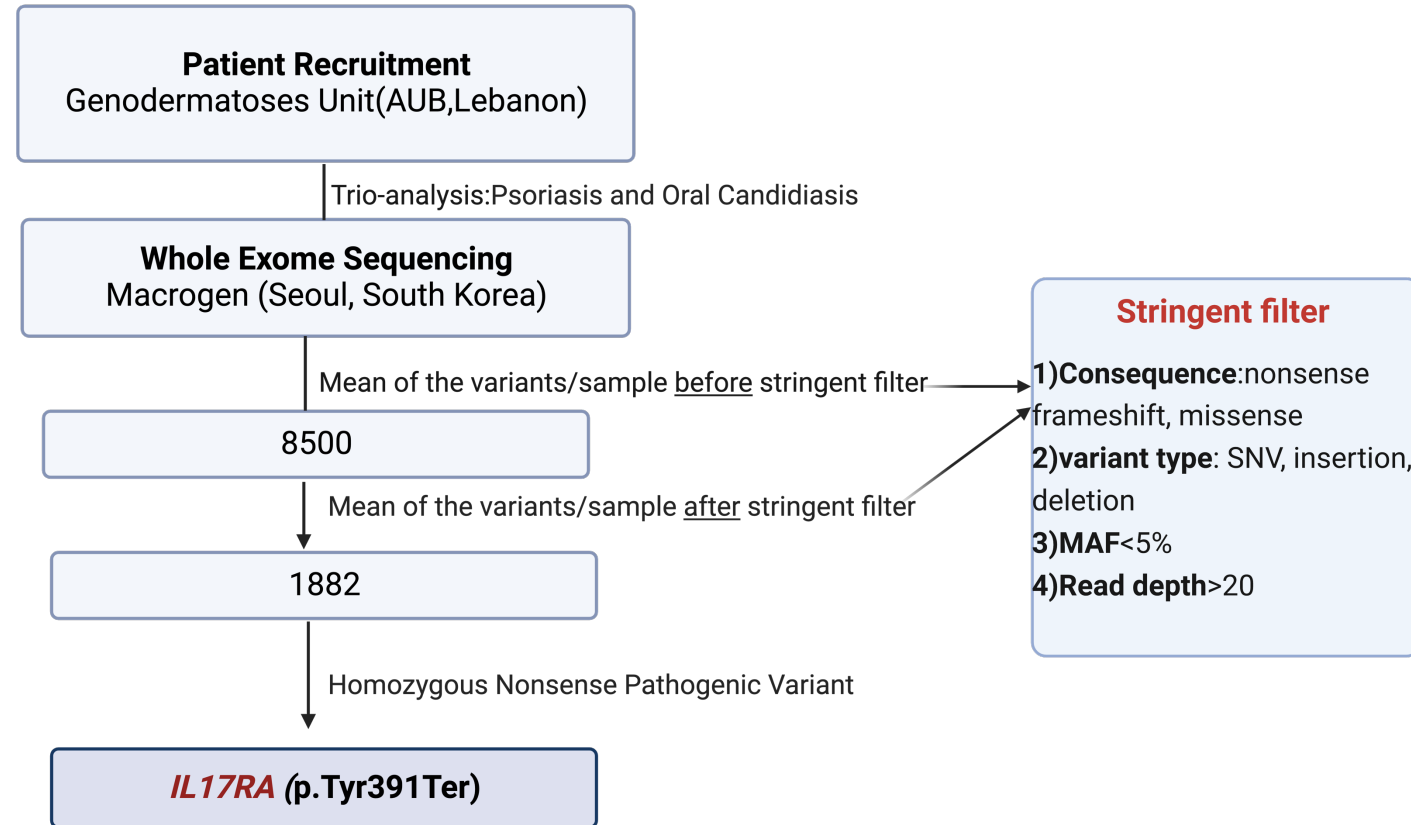

Supplementary Figure 2 (A)

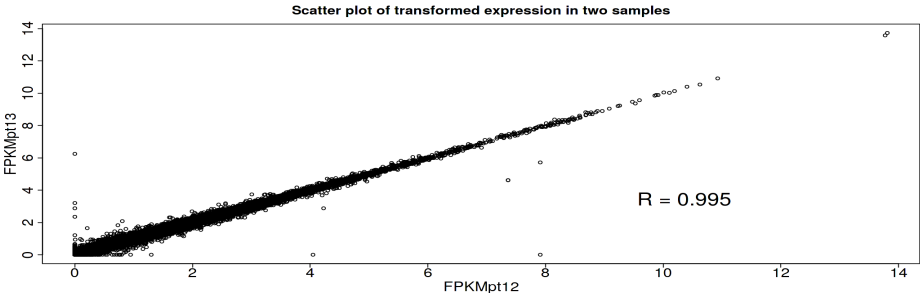

Supplementary Figure 2 (B)

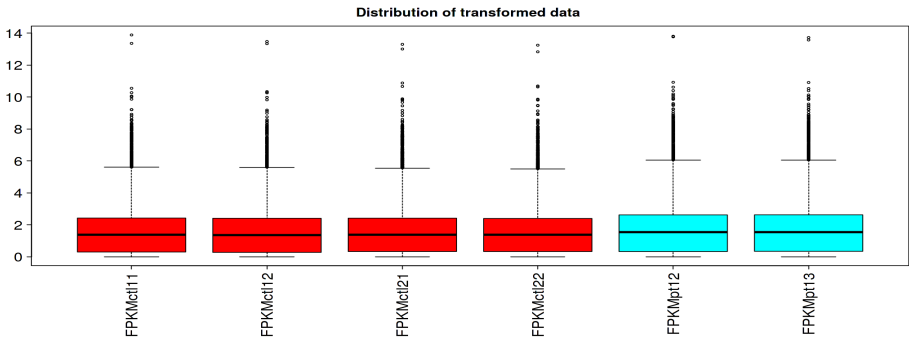

Supplementary Figure 2 (C)

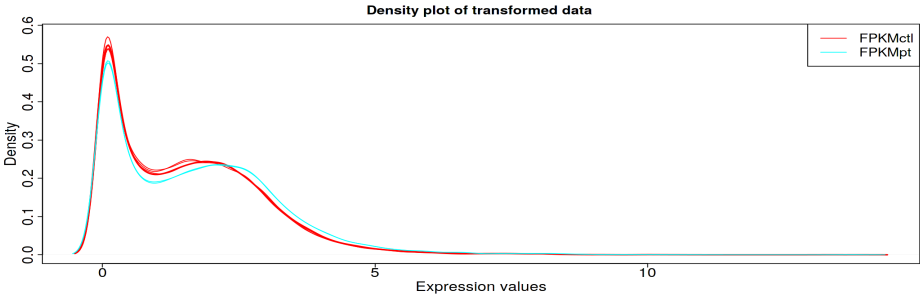

Supplementary Figure 2 (D)

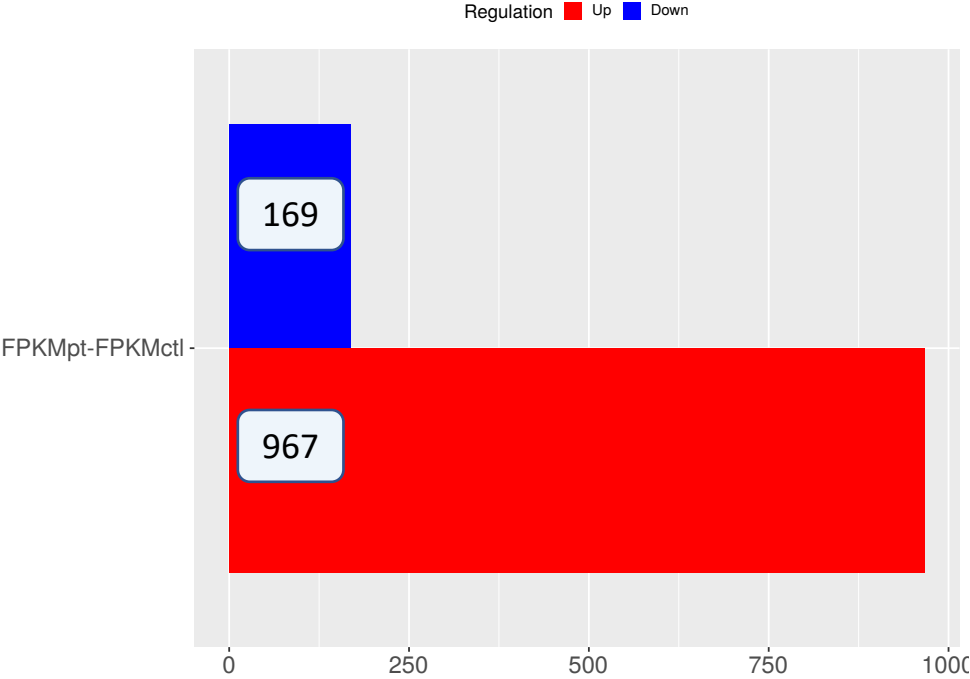

Supplementary Figure 2 (E)

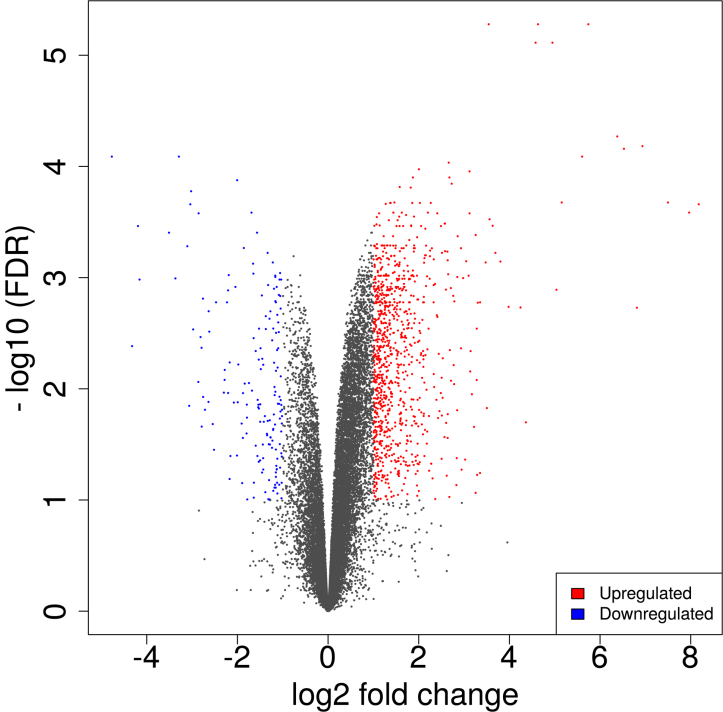

Supplementary Figure 2 (F)

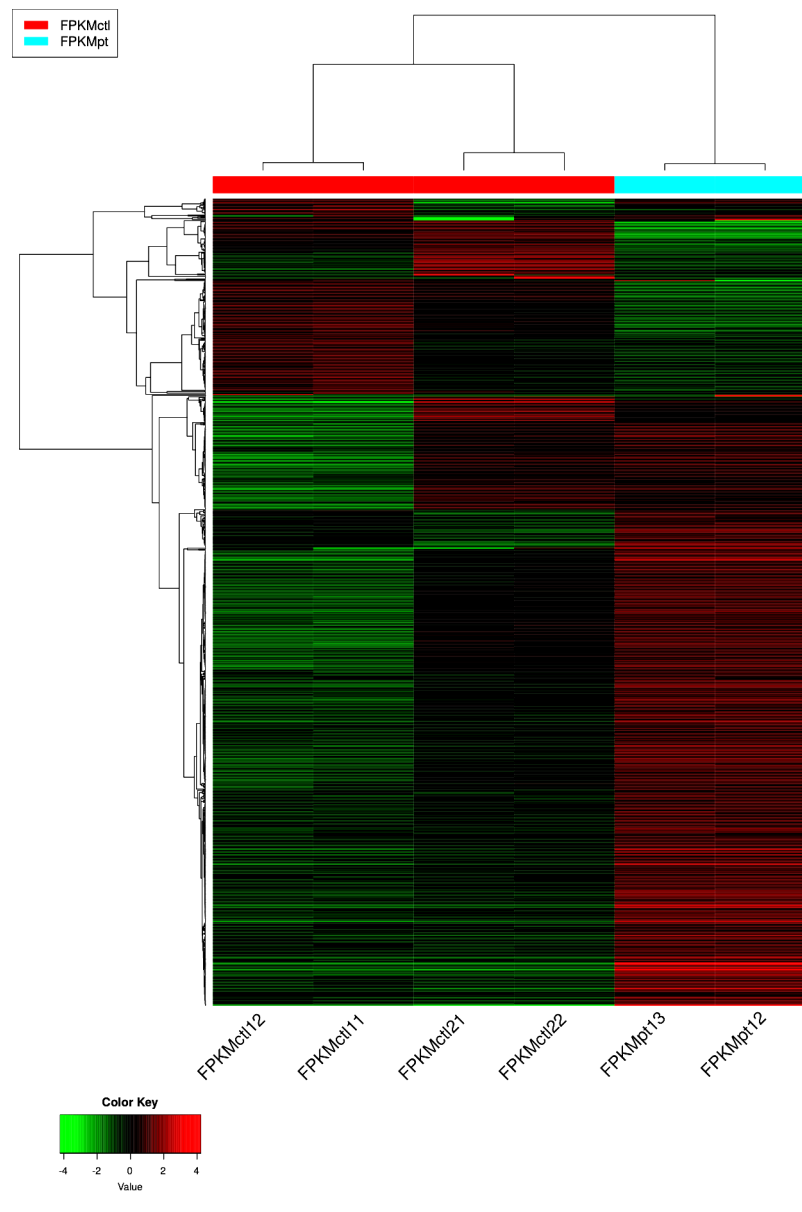

Supplementary Figure 3 (A)

**HEK239**

Both wild-type and the Y391\*-mutant IL17RA are localized at the cell membrane

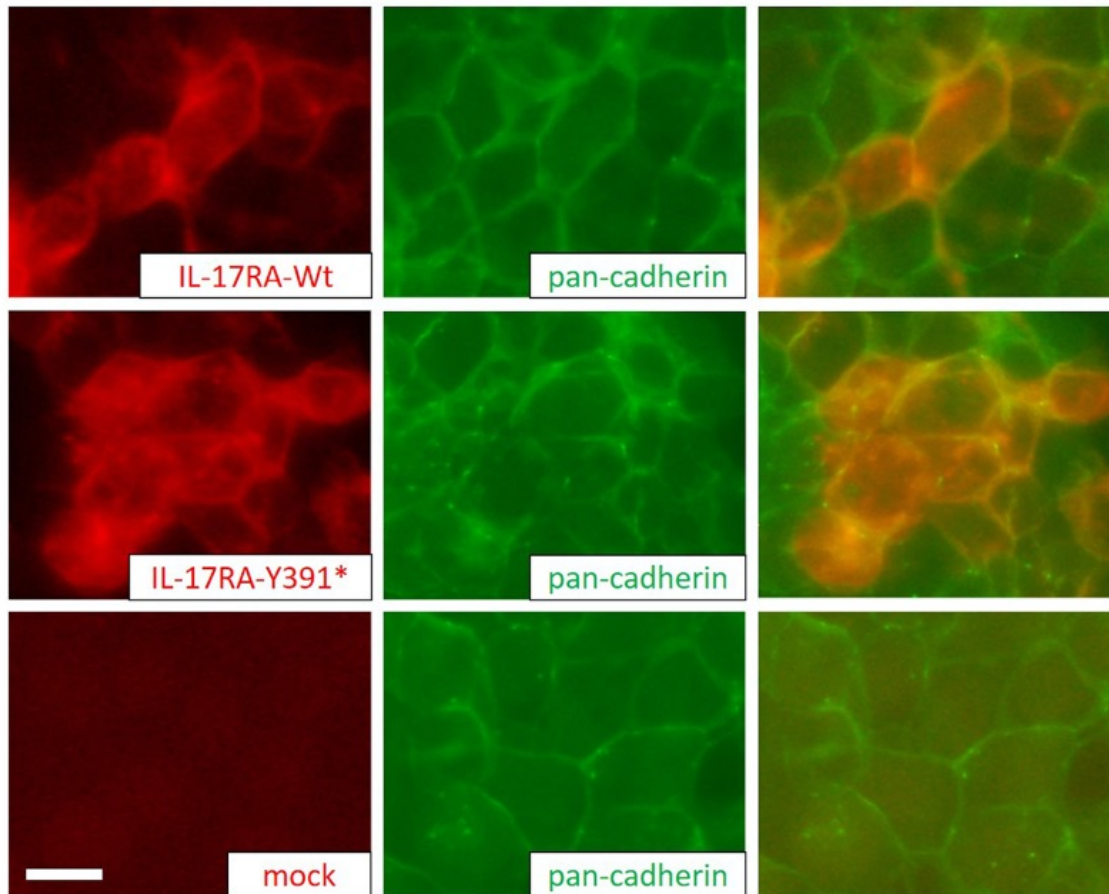

Supplementary Figure 3 (B)

**HaCat**

Both wild-type and the Y391\*-mutant IL17RA are localized at the cell membrane

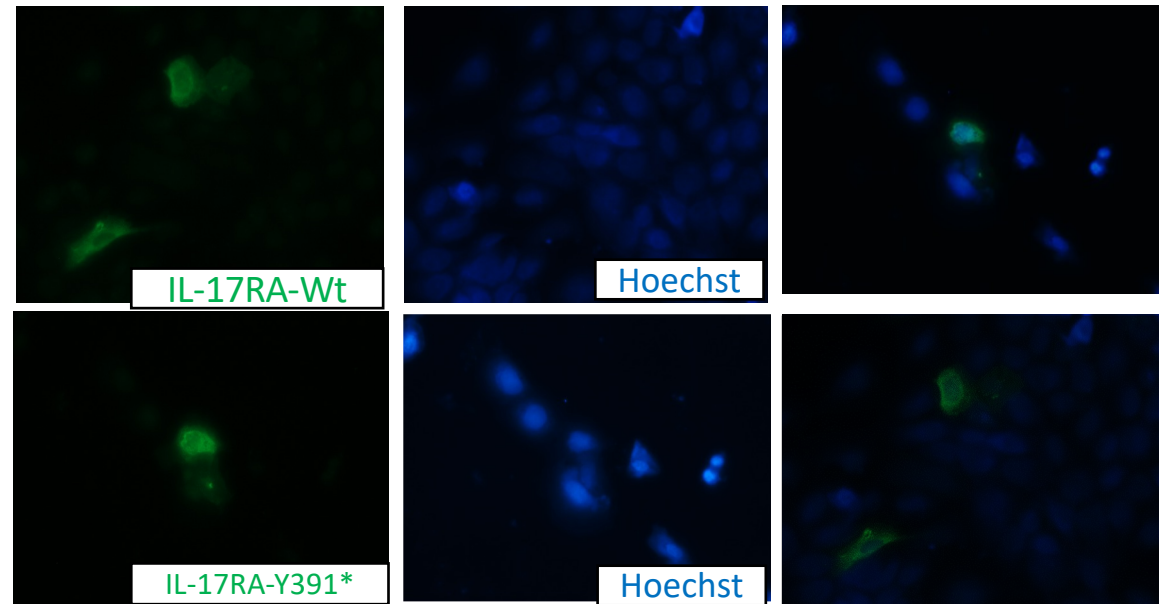

Supplement: Data_Sheet_1.pdf [file Data_Sheet_1.pdf]
