# Supplementary material for: Deciphering the role of IL17RA in psoriasis and chronic mucocutaneous candidiasis: shared pathways and distinct manifestations
Source: Front Immunol. 2025 Jan 20;15:1516408. doi: 10.3389/fimmu.2024.1516408 (PMC11796622; doi:10.3389/fimmu.2024.1516408)
Supplement: Supplementary file 2 [file Table1.xlsx]

## Sheet: Sheet1
Supplementary1:Raw Data Statistics and Quality scores
Sample	Total Read Bases(bp)	Total Read Count	GC (%)	AT (%)	Q20 (%)	Q30 (%)
II.1	6288326446	41644546	51.88	48.12	97.59	93.61
I.2	6076322748	40240548	51.84	48.16	97.63	93.68
I.1	5915109108	39172908	51.99	48.01	97.62	93.68
								Total read bases : Total anumber of bases sequenced. Total number of reads: For Illumina paired-end sequencing, this value refers to the sum of read 1 and read 2. GC(%) : GC content AT(%) : AT content. Q20(%) : Ratio of bases that have phred quality score of over 20. · Q30(%) : Ratio of bases that have phred quality score of over 30.
