# Supplementary material for: Deciphering the role of IL17RA in psoriasis and chronic mucocutaneous candidiasis: shared pathways and distinct manifestations
Source: Front Immunol. 2025 Jan 20;15:1516408. doi: 10.3389/fimmu.2024.1516408 (PMC11796622; doi:10.3389/fimmu.2024.1516408)
Supplement: Supplementary file 3 [file Table2.xlsx]

## Sheet: Diff_genes_heatmap_FPKMpt-FPKMc
Supplementary Table 2: The full list of up/downregulated Differentially Expressed Genes (DEGs)
Regulation	Ensembl ID	log2 Fold Change	Adj.Pval	Symbol	Chr	Type	FPKMCTRL12	FPKMCTRL11	FPKMCTRL21	FPKMCTRL22	FPKMPT3	FPKMPT2
Up	ENSG00000163220	8.17693	0.000219	S100A9	1q21.3	protein_coding	3.05838	3.14591	2.42069	2.34885	10.9268	10.914
Up	ENSG00000213140	7.96512	0.00026	ELK2AP	14q32.33	processed_pseudogene	0	0	0.553414	0.849631	8.37384	8.25792
Up	ENSG00000143546	7.49794	0.000211	S100A8	1q21.3	protein_coding	3.22297	3.20428	2.62388	2.56472	10.4047	10.3991
Up	ENSG00000143556	6.93518	6.57e-05	S100A7	1q21.3	protein_coding	2.83854	3.31321	3.16031	3.20389	10.106	10.0223
Up	ENSG00000202515	6.81204	0.00186	VTRNA1-3	5q31.3	misc_RNA	0	0	0	0	7.91092	5.71316
Up	ENSG00000254709	6.52671	6.94e-05	IGLL5	22q11.22	protein_coding	0.596149	0.696944	0.272269	0.684315	7.04924	7.12902
Up	ENSG00000206073	6.37927	5.37e-05	SERPINB4	18q21.33	protein_coding	0.221262	0.515865	0.164595	0.142841	6.67789	6.60294
Up	ENSG00000196611	5.74151	5.26e-06	MMP1	11q22.2	protein_coding	0	0.0746686	0.0308974	0.0528321	5.83467	5.72756
Up	ENSG00000275385	5.60476	8.16e-05	CCL18	17q12	protein_coding	0.242295	0.10285	0.446655	0.500686	5.97322	5.88254
Up	ENSG00000012223	5.15418	0.000211	LTF	3p21.31	protein_coding	0.102767	0.236482	0.588868	0.5476	5.57304	5.47317
Up	ENSG00000124102	5.03872	0.00129	PI3	20q13.12	protein_coding	1.40923	1.35996	0.351302	0.477747	5.85415	6.02242
Up	ENSG00000057149	4.94977	7.71e-06	SERPINB3	18q21.33	protein_coding	1.22196	1.30615	1.21967	1.38209	6.23306	6.23141
Up	ENSG00000149968	4.63022	5.26e-06	MMP3	11q22.2	protein_coding	0	0.0394714	0.0638093	0.0819242	4.71857	4.63447
Up	ENSG00000184330	4.57798	7.71e-06	S100A7A	1q21.3	protein_coding	0.0500067	0.169521	0.0458543	0.0227881	4.64543	4.65462
Up	ENSG00000170323	4.36353	0.02	FABP4	8q21.13	protein_coding	0.99413	1.00094	3.33112	3.28018	6.59376	6.43649
Up	ENSG00000205420	4.24529	0.00186	KRT6A	12q13.13	protein_coding	5.27036	5.00142	6.06719	6.09319	9.85802	9.84863
Up	ENSG00000170465	3.98245	0.00183	KRT6C	12q13.13	protein_coding	2.80724	2.87414	3.66047	3.80383	7.25086	7.28688
Up	ENSG00000186832	3.80189	0.000717	KRT16	17q21.2	protein_coding	5.23216	4.8184	5.52082	5.47627	9.08436	9.04324
Up	ENSG00000090104	3.6914	0.000599	RGS1	1q31.2	protein_coding	0.298519	0.374315	0.568856	0.913735	4.1296	4.33091
Up	ENSG00000241794	3.63056	0.000341	SPRR2A	1q21.3	protein_coding	1.22038	1.69884	1.29245	1.32252	4.97021	5.05801
Up	ENSG00000169469	3.56143	0.000299	SPRR1B	1q21.3	protein_coding	3.51229	3.95306	3.89806	3.72307	7.3	7.3661
Up	ENSG00000122026	3.54413	5.26e-06	RPL21	13q12.2	protein_coding	0.0235075	0.0203598	0.0156489	0.0145054	3.57582	3.54946
Up	ENSG00000170345	3.50312	0.0149	FOS	14q24.3	protein_coding	3.90945	3.70321	2.10782	2.16098	6.47399	6.47298
Up	ENSG00000168685	3.47662	0.00073	IL7R	5p13.2	protein_coding	0.379822	0.429929	0.938287	0.887259	4.17071	4.10019
Up	ENSG00000262406	3.35357	0.00167	MMP12	11q22.2	protein_coding	0	0.038398	0.730828	0.750031	3.78822	3.67856
Up	ENSG00000204897	3.35193	0.0571	KRT25	17q21.2	protein_coding	1.59183	1.73331	4.23785	4.17057	6.27171	6.29892
Up	ENSG00000226482	3.30172	0.00168	ADIPOQ-AS1	3q27.3	antisense	0.050113	0	0.720381	0.764959	3.659	3.71217
Up	ENSG00000205186	3.28934	0.0595	FABP9	8q21.13	protein_coding	1.0616	0.773691	3.51137	3.36848	5.5121	5.42415
Up	ENSG00000121966	3.28004	0.00288	CXCR4	2q22.1	protein_coding	0.340935	0.602826	1.3104	1.33404	4.13643	4.21774
Up	ENSG00000165474	3.27941	0.00834	GJB2	13q12.11	protein_coding	2.80338	2.63595	3.92213	4.06449	6.58541	6.68637
Up	ENSG00000113070	3.25613	0.000414	HBEGF	5q31.3	protein_coding	0.58414	0.745065	1.07147	0.907118	4.06508	4.10108
Up	SNAR-B1	3.25536	0.0863	NA	NANA	NA	0	1.9085	0	3.43847	4.515	4.66921
Up	SNAR-B2	3.25536	0.0863	NA	NANA	NA	0	1.9085	0	3.43847	4.515	4.66921
Up	ENSG00000171446	3.21955	0.022	KRT27	17q21.2	protein_coding	1.15334	1.07909	2.83328	2.92456	5.21019	5.22405
Up	ENSG00000122862	3.17311	0.0112	SRGN	10q22.1	protein_coding	0.954016	1.14841	2.48249	2.3572	4.915	4.90229
Up	ENSG00000172724	3.14445	0.00458	CCL19	9p13.3	protein_coding	2.44262	2.3266	3.2752	3.46129	6.02002	6.02174
Up	ENSG00000244734	3.13605	0.00698	HBB	11p15.4	protein_coding	2.9713	2.88761	1.9916	1.62197	5.51381	5.49453
Up	ENSG00000198074	3.12063	0.000264	AKR1B10	7q33	protein_coding	0.677045	0.498204	0.704012	0.499491	3.8633	3.56733
Up	ENSG00000170476	3.12007	0.000111	MZB1	5q31.2	protein_coding	0	0.0946597	0.22209	0.192562	3.20492	3.28987
Up	ENSG00000163216	3.09969	0.00096	SPRR2D	1q21.3	protein_coding	1.68666	2.13742	1.61104	1.46252	4.77421	4.87399
Up	ENSG00000125414	3.04749	0.000713	MYH2	17p13.1	protein_coding	0.531596	0.415508	0.0396099	0.0663029	3.38705	3.23443
Up	ENSG00000169474	3.02375	0.0433	SPRR1A	1q21.3	protein_coding	0.832046	1.47355	3.22301	3.1391	5.13201	5.24934
Up	ENSG00000188373	2.97883	0.00101	C10orf99	10q23.1	protein_coding	0.116152	0.420702	0.782508	0.651077	3.46369	3.47919
Up	ENSG00000139648	2.94516	0.0534	KRT71	12q13.13	protein_coding	1.97578	1.53964	3.96481	3.86194	5.77396	5.78744
Up	ENSG00000188015	2.93292	0.00432	S100A3	1q21.3	protein_coding	1.80836	1.51975	2.66707	2.37983	5.08633	4.96702
Up	ENSG00000120738	2.93181	0.000544	EGR1	5q31.2	protein_coding	2.52873	2.72996	3.00176	2.93953	5.74078	5.72283
Up	ENSG00000184557	2.85975	0.000424	SOCS3	17q25.3	protein_coding	1.47287	1.24696	1.17064	1.03794	4.05591	4.12779
Up	ENSG00000130487	2.85077	0.000987	KLHDC7B	22q13.33	protein_coding	0.0859361	0.0919118	0.541374	0.59278	3.18849	3.16905
Up	ENSG00000216490	2.84815	0.0156	IFI30	19p13.11	protein_coding	2.08547	2.45951	3.63391	3.63085	5.84225	5.75892
Up	ENSG00000203783	2.83813	0.042	PRR9	1q21.3	protein_coding	0.889136	0.330533	2.62039	2.3667	4.35897	4.42066
Up	ENSG00000159450	2.83096	0.0735	TCHH	1q21.3	protein_coding	1.70089	1.80146	4.10954	4.10114	5.68803	5.83041
Up	ENSG00000163202	2.78563	0.00164	LCE3D	1q21.3	protein_coding	1.46864	1.09459	1.77812	1.79057	4.20727	4.42996
Up	ENSG00000166819	2.78026	0.00908	PLIN1	15q26.1	protein_coding	0.168542	0.281943	1.39973	1.28485	3.55346	3.5746
Up	ENSG00000137077	2.77049	0.00612	CCL21	9p13.3	protein_coding	3.43024	3.33565	2.5369	2.31909	5.73588	5.61604
Up	ENSG00000100985	2.76157	0.00146	MMP9	20q13.12	protein_coding	0.51048	0.328896	0.980778	0.947846	3.43259	3.47454
Up	ENSG00000244122	2.72679	0.000143	UGT1A7	2q37.1	protein_coding	0.262482	0.0838191	0.103557	0.0276063	2.85864	2.83368
Up	ENSG00000196754	2.71208	0.00845	S100A2	1q21.3	protein_coding	3.8231	3.54471	4.78297	4.67474	6.94681	6.89011
Up	ENSG00000137648	2.70872	0.00124	TMPRSS4	11q23.3	protein_coding	0.936145	0.839394	0.383645	0.380134	3.32837	3.35873
Up	ENSG00000115523	2.68657	0.00449	GNLY	2p11.2	protein_coding	0.251703	0.299982	1.2556	0.768003	3.17745	3.48334
Up	ENSG00000196616	2.6771	0.000126	ADH1B	4q23	protein_coding	1.96398	2.13216	2.15771	2.14781	4.78887	4.76616
Up	ENSG00000164687	2.67529	0.094	FABP5	8q21.13	protein_coding	3.91822	4.20144	6.49369	6.51474	7.92677	7.98786
Up	ENSG00000204936	2.66136	9.24e-05	CD177	19q13.31	protein_coding	0.1776	0.275838	0.118797	0.102964	2.83193	2.82839
Up	ENSG00000123358	2.64955	0.000933	NR4A1	12q13.13	protein_coding	0.932482	1.10933	0.583765	0.701445	3.39658	3.56604
Up	ENSG00000185479	2.63998	0.0169	KRT6B	12q13.13	protein_coding	4.3763	4.37476	5.69274	5.70072	7.6762	7.67602
Up	ENSG00000185962	2.63856	0.000699	LCE3A	1q21.3	protein_coding	0	0	0.365782	0.311567	2.69457	2.92123
Up	ENSG00000170454	2.63847	0.0277	KRT75	12q13.13	protein_coding	1.62779	1.3005	3.04439	2.96395	4.89843	4.84682
Up	CYR61	2.63241	0.000583	NA	NANA	NA	1.68659	1.25433	1.28466	1.38951	4.0388	4.03357
Up	ENSG00000158869	2.61775	0.0604	FCER1G	1q23.3	protein_coding	0.816848	1.28681	3.07494	3.02573	4.63658	4.70108
Up	ENSG00000004799	2.60467	0.0203	PDK4	7q21.3	protein_coding	0.528759	0.585606	1.95811	1.92034	3.83489	3.87086
Up	ENSG00000148339	2.60096	0.00128	SLC25A25	9q34.11	protein_coding	1.84799	1.30893	1.25251	1.2988	4.10244	3.95358
Up	ENSG00000181092	2.58071	0.000578	ADIPOQ	3q27.3	protein_coding	0.112134	0.07792	0.391285	0.453657	2.84158	2.83734
Up	ENSG00000109061	2.57889	0.000326	MYH1	17p13.1	protein_coding	0.322049	0.201547	0.0445985	0.0554018	2.80737	2.66221
Up	ENSG00000175592	2.57131	0.000326	FOSL1	11q13.1	protein_coding	0.816483	0.604755	0.560268	0.494302	3.23759	3.14293
Up	ENSG00000139329	2.56748	0.0272	LUM	12q21.33	protein_coding	0.980073	1.38517	2.67577	2.6424	4.55893	4.41774
Up	ENSG00000125730	2.53082	0.00532	C3	19p13.3	protein_coding	2.88403	2.85092	3.7699	3.64224	5.78299	5.85221
Up	ENSG00000116824	2.52684	0.0121	CD2	1p13.1	protein_coding	0.273672	0.489151	1.47671	1.50693	3.43433	3.49257
Up	ENSG00000102265	2.5125	0.000599	TIMP1	Xp11.3	protein_coding	3.16459	3.34969	3.62046	3.43674	5.89872	5.91202
Up	ENSG00000128422	2.51014	0.0174	KRT17	17q21.2	protein_coding	5.85062	5.55806	7.02647	6.87246	8.8558	8.81828
Up	ENSG00000064886	2.5052	0.00795	CHI3L2	1p13.2	protein_coding	0.971536	0.507972	1.73291	1.53928	3.69383	3.69243
Up	ENSG00000081237	2.50469	0.0426	PTPRC	1q31.3	protein_coding	1.52129	1.6426	3.28623	3.30134	4.94714	4.93798
Up	ENSG00000143632	2.49104	0.000344	ACTA1	1q42.13	protein_coding	1.1112	1.02718	0.840159	1.04889	3.38749	3.6083
Up	ENSG00000120129	2.48684	0.0109	DUSP1	5q35.1	protein_coding	3.96221	3.92792	2.8641	2.88882	5.87126	5.92395
Up	ENSG00000173908	2.45809	0.0159	KRT28	17q21.2	protein_coding	0.419255	0.164316	1.54904	1.40501	3.32248	3.36251
Up	ENSG00000170484	2.44222	0.00485	KRT74	12q13.13	protein_coding	1.05592	1.0192	1.81102	1.8348	3.8611	3.88382
Up	ENSG00000109861	2.42677	0.0183	CTSC	11q14.2	protein_coding	2.4643	2.48657	3.70406	3.73743	5.54061	5.50912
Up	ENSG00000106565	2.4113	0.00226	TMEM176B	7q36.1	protein_coding	1.2041	1.10871	1.62166	1.78995	3.74149	3.94333
Up	ENSG00000163739	2.40971	0.000264	CXCL1	4q13.3	protein_coding	0	0.0640257	0.245297	0.213339	2.50669	2.57407
Up	ENSG00000155307	2.3998	0.00218	SAMSN1	21q11.2	protein_coding	0.136092	0.179707	0.603132	0.818698	2.818	2.85041
Up	ENSG00000167286	2.39065	0.0126	CD3D	11q23.3	protein_coding	0.131951	0.301331	1.34634	1.21618	3.07536	3.20384
Up	ENSG00000206468	2.36394	0.098	UBD	CHR_HSCHR6_MHC_MCF_CTG1	protein_coding	0.422505	0.909472	2.87281	2.80181	4.04532	4.18587
Up	ENSG00000185966	2.35977	0.00114	LCE3E	1q21.3	protein_coding	0.0978211	0.361237	0.55325	0.603104	2.86166	2.66558
Up	ENSG00000023445	2.34057	0.00964	BIRC3	11q22.2	protein_coding	1.0263	1.17363	2.0867	2.02362	3.94594	3.89033
Up	ENSG00000092295	2.33145	0.000685	TGM1	14q12	protein_coding	2.23723	2.25897	1.89048	1.9667	4.40199	4.43759
Up	ENSG00000204359	2.33089	0.00737	CFB	CHR_HSCHR6_MHC_MANN_CTG1	protein_coding	0.988788	1.06565	1.90018	1.88749	3.83838	3.74446
Up	ENSG00000171711	2.32945	0.00117	DEFB4A	8p23.1	protein_coding	0	0.301845	0	0	2.63681	2.17302
Up	ENSG00000101470	2.3275	0.00167	TNNC2	20q13.12	protein_coding	0.887216	0.426191	0.578004	0.785367	3.2418	2.75159
Up	ENSG00000100453	2.30442	0.0639	GZMB	14q12	protein_coding	0.10235	0	1.75558	1.96918	3.31352	3.20887
Up	ENSG00000214822	2.28972	0.000544	KRT16P3	17p11.2	transcribed_unprocessed_pseudogene	1.17469	1.06818	1.21701	1.38547	3.37996	3.62215
Up	ENSG00000165168	2.27744	0.0472	CYBB	Xp21.1	protein_coding	0.627685	0.53523	2.14362	2.2419	3.64841	3.6807
Up	ENSG00000137440	2.27296	0.0471	FGFBP1	4p15.32	protein_coding	3.35701	3.21004	1.66054	1.69471	4.75203	4.75503
Up	ENSG00000158050	2.26499	0.000213	DUSP2	2q11.2	protein_coding	0.460894	0.38178	0.555156	0.574583	2.80514	2.71104
Up	ENSG00000102962	2.25067	0.000571	CCL22	16q21	protein_coding	0.921889	1.16432	1.28633	1.04315	3.41205	3.29714
Up	ENSG00000164530	2.24766	0.000642	PI16	6p21.2	protein_coding	1.40416	1.26112	1.58585	1.63871	3.7051	3.73513
Up	ENSG00000102096	2.24121	0.00102	PIM2	Xp11.23	protein_coding	0.798936	0.631592	1.14546	0.950184	3.13862	3.10689
Up	ENSG00000204873	2.22904	0.0546	KRTAP9-3	17q21.2	protein_coding	0	0.0769276	1.71474	1.68144	3.05003	3.1446
Up	ENSG00000167755	2.2252	0.0176	KLK6	19q13.41	protein_coding	0.429828	0.31561	1.46573	1.52224	3.12236	3.19475
Up	ENSG00000085265	2.21684	0.00288	FCN1	9q34.3	protein_coding	0.204493	0.166957	0.821831	0.706345	2.66733	2.71615
Up	ENSG00000156234	2.20215	0.00026	CXCL13	4q21.1	protein_coding	0	0.0620623	0.193501	0.207019	2.35136	2.28424
Up	ENSG00000131203	2.19164	0.00441	IDO1	8p11.21	protein_coding	1.14951	0.929707	1.70356	1.69977	3.58025	3.54431
Up	ENSG00000177575	2.18719	0.0242	CD163	12p13.31	protein_coding	0.585352	0.670188	1.87063	1.85291	3.42066	3.44328
Up	ENSG00000107742	2.18387	0.000974	SPOCK2	10q22.1	protein_coding	0.536395	0.386798	0.872833	0.68012	2.78879	2.81703
Up	ENSG00000077984	2.17787	0.0311	CST7	20p11.21	protein_coding	0.37029	0.305849	1.62061	1.71335	3.25192	3.10888
Up	ENSG00000272398	2.17204	0.0102	CD24	6q21	protein_coding	2.32525	2.52027	3.23899	3.39226	5.03497	5.04749
Up	ENSG00000187175	2.16215	0.000516	KRTAP12-1	21q22.3	protein_coding	0.468082	0.142123	0.226399	0.195694	2.38273	2.45772
Up	ZFP36	2.16107	0.00119	NA	NANA	NA	3.39594	3.75198	3.70347	3.93874	5.87424	5.84296
Up	ENSG00000221864	2.15493	0.00063	KRTAP12-2	21q22.3	protein_coding	0.365433	0	0.0889565	0.149304	2.36445	2.24726
Up	ENSG00000187288	2.14917	0.00497	CIDEC	3p25.3	protein_coding	0.150005	0	0.828417	0.682479	2.59449	2.53429
Up	ENSG00000181374	2.14545	0.000363	CCL13	17q12	protein_coding	0.491425	0.727205	0.762885	0.717264	2.79356	2.84673
Up	ENSG00000171051	2.14029	0.00063	FPR1	19q13.41	protein_coding	0.373876	0.0561841	0.0906094	0.0782928	2.36401	2.21605
Up	ENSG00000188536	2.13729	0.0234	HBA2	16p13.3	protein_coding	2.75021	2.71989	1.35353	1.84424	4.23941	4.36912
Up	ENSG00000183813	2.12598	0.000668	CCR4	3p22.3	protein_coding	0.20579	0.127707	0.323737	0.497321	2.3617	2.46754
Up	ENSG00000145649	2.12501	0.0402	GZMA	5q11.2	protein_coding	0	0	1.41356	1.42667	2.76246	2.90768
Up	ENSG00000128340	2.12398	0.00879	RAC2	22q13.1	protein_coding	1.00439	0.883907	1.77126	1.79623	3.44037	3.53548
Up	ENSG00000166927	2.1183	0.000734	MS4A7	11q12.2	protein_coding	0.535408	0.480381	0.775271	0.836626	2.77811	2.77233
Up	ENSG00000134755	2.11388	0.0167	DSC2	18q12.1	protein_coding	2.48723	2.51162	3.59896	3.49834	5.15012	5.12573
Up	ENSG00000147168	2.11363	0.00167	IL2RG	Xq13.1	protein_coding	1.62497	1.72937	2.0619	2.16597	4.05238	3.96599
Up	ENSG00000175445	2.11251	0.00149	LPL	8p21.3	protein_coding	0.662279	0.628701	1.03431	1.0925	3.02663	2.90728
Up	ENSG00000125740	2.10872	0.0176	FOSB	19q13.32	protein_coding	1.30858	1.15416	0.148268	0.195293	2.78319	2.8374
Up	ENSG00000239264	2.10429	0.00543	TXNDC5	6p24.3	protein_coding	1.90027	2.51169	2.78908	2.73523	4.55485	4.62186
Up	ENSG00000212657	2.10206	0.00505	KRTAP16-1	17q21.2	protein_coding	0.0581107	0	0.647756	0.762993	2.41483	2.52371
Up	ENSG00000002933	2.10201	0.00635	TMEM176A	7q36.1	protein_coding	0.537224	0.652418	1.38607	1.27688	3.07349	3.05683
Up	ENSG00000170458	2.09688	0.00167	CD14	5q31.3	protein_coding	1.06299	0.984309	1.50763	1.39739	3.40197	3.26796
Up	ENSG00000126353	2.09667	0.00457	CCR7	17q21.2	protein_coding	0.262401	0.324372	1.05882	0.772443	2.65496	2.74739
Up	ENSG00000197249	2.09397	0.0257	SERPINA1	14q32.13	protein_coding	0.0802352	0.291997	1.39688	1.36185	2.92464	2.82879
Up	ENSG00000129451	2.08079	0.0024	KLK10	19q13.41	protein_coding	1.77496	1.68659	1.15346	1.32302	3.54638	3.5842
Up	ENSG00000112096	2.07343	0.00798	SOD2	6q25.3	protein_coding	4.18074	4.23351	5.0348	4.96651	6.70701	6.64762
Up	ENSG00000206172	2.06867	0.0209	HBA1	16p13.3	protein_coding	2.74564	2.73032	1.50232	1.79163	4.27648	4.24581
Up	ENSG00000051523	2.05651	0.0163	CYBA	16q24.2	protein_coding	2.66193	2.31892	3.5504	3.35607	4.91827	5.13841
Up	ENSG00000123975	2.05387	0.00478	CKS2	9q22.2	protein_coding	1.36452	0.986394	1.55166	1.79849	3.28124	3.67702
Up	ENSG00000278828	2.05169	0.000344	HIST1H3H	6p22.1	protein_coding	2.80113	2.9625	2.72093	2.75234	4.91791	4.80391
Up	ENSG00000172818	2.04652	0.00496	OVOL1	11q13.1	protein_coding	2.73266	2.58756	2.09507	1.93862	4.35136	4.41864
Up	ENSG00000118515	2.03507	0.00315	SGK1	6q23.2	protein_coding	2.7309	2.86267	3.32937	3.35876	5.1196	5.09138
Up	ENSG00000101447	2.02629	0.000213	FAM83D	20q11.23	protein_coding	0.732875	0.672393	0.663348	0.817181	2.80311	2.69237
Up	ENSG00000131042	2.02202	0.00583	LILRB2	19q13.42	protein_coding	0.0879505	0.116654	0.818864	0.758692	2.52841	2.40671
Up	ENSG00000132965	2.02122	0.0121	ALOX5AP	13q12.3	protein_coding	0.538528	0.572381	1.37434	1.50452	3.09672	2.94061
Up	ENSG00000203747	2.02119	0.0457	FCGR3A	1q23.3	protein_coding	0.100704	0.112933	1.55455	1.47885	2.7422	2.92371
Up	ENSG00000278463	2.01814	0.00301	HIST1H2AB	6p22.2	protein_coding	1.59609	1.95533	2.23946	1.59387	3.87836	3.85029
Up	ENSG00000177243	2.01731	0.00256	DEFB103B	8p23.1	protein_coding	0	0	0.387658	0.429238	2.00907	2.43401
Up	ENSG00000171223	2.01222	0.00369	JUNB	19p13.13	protein_coding	4.83261	4.54005	4.20329	4.10122	6.36792	6.49511
Up	ENSG00000122877	2.00843	0.0155	EGR2	10q21.3	protein_coding	0.937757	1.14699	2.04634	1.95631	3.51163	3.54893
Up	ENSG00000079931	2.00377	0.000106	MOXD1	6q23.2	protein_coding	1.67501	1.74904	1.6956	1.64338	3.72256	3.66648
Up	ENSG00000187272	2.00222	0.0831	KRTAP9-8	17q21.2	protein_coding	0	0.150795	1.90535	1.72149	2.93078	2.96248
Up	ENSG00000212900	1.99934	0.0477	KRTAP3-2	17q21.2	protein_coding	0.272032	0.588372	1.83921	1.80861	3.00948	3.24332
Up	ENSG00000113088	1.9903	0.0218	GZMK	5q11.2	protein_coding	0	0.0725618	1.28253	0.874086	2.51291	2.58227
Up	ENSG00000021355	1.98673	0.00157	SERPINB1	6p25.2	protein_coding	2.06976	2.03078	2.50728	2.3918	4.21797	4.2553
Up	ENSG00000186860	1.98191	0.00379	KRTAP17-1	17q21.2	protein_coding	0	0	0.308617	0.643866	2.05443	2.38563
Up	ENSG00000105374	1.97538	0.0311	NKG7	19q13.41	protein_coding	0	0.183738	1.152	1.38991	2.77714	2.53643
Up	ENSG00000278705	1.97535	0.0126	HIST1H4B	6p22.2	protein_coding	4.45074	4.46481	3.5639	3.5768	6.03258	5.94625
Up	ENSG00000185885	1.975	0.0549	IFITM1	11p15.5	protein_coding	3.67205	3.89389	5.20953	5.28568	6.52747	6.4531
Up	ENSG00000198851	1.97361	0.0397	CD3E	11q23.3	protein_coding	0.172436	0.34777	1.61193	1.51908	2.93878	2.83405
Up	ENSG00000123689	1.97334	0.0472	G0S2	1q32.2	protein_coding	0.0979558	0	1.62512	1.1848	2.61935	2.78128
Up	ENSG00000125968	1.9701	0.00157	ID1	20q11.21	protein_coding	3.39219	3.27452	3.77421	3.59598	5.38294	5.57572
Up	ENSG00000221880	1.96757	0.0917	KRTAP1-3	17q21.2	protein_coding	0	0	1.44389	2.02647	2.881	2.78932
Up	ENSG00000109321	1.96446	0.000433	AREG	4q13.3	protein_coding	0.425826	0.303456	0.594114	0.473493	2.39639	2.43097
Up	ENSG00000197683	1.96287	0.00553	KRTAP26-1	21q22.11	protein_coding	0.155572	0	0.643404	0.799888	2.34703	2.37815
Up	ENSG00000121552	1.96243	0.00096	CSTA	3q21.1	protein_coding	3.7914	3.95532	4.08075	4.21808	5.95107	5.99657
Up	ENSG00000204472	1.96061	0.074	AIF1	6p21.33	protein_coding	1.17924	1.73586	2.96076	3.11989	4.24525	4.17384
Up	ENSG00000162511	1.95104	0.0205	LAPTM5	1p35.2	protein_coding	1.86207	1.88735	2.86587	2.95463	4.38712	4.29993
Up	ENSG00000008517	1.93541	0.0444	IL32	16p13.3	protein_coding	1.68432	1.81342	3.18304	2.95962	4.43687	4.25414
Up	ENSG00000198083	1.93375	0.0583	KRTAP9-9	17q21.2	protein_coding	0.0959517	0.0779003	1.61486	1.47263	2.8977	2.60047
Up	ENSG00000117091	1.93108	0.0409	CD48	1q23.3	protein_coding	0.485488	0.478081	1.71679	1.82597	3.16592	2.94941
Up	ENSG00000169442	1.92866	0.0205	CD52	1p36.11	protein_coding	2.14809	1.71397	2.75062	3.0197	4.42838	4.24514
Up	ENSG00000135074	1.91811	0.00234	ADAM19	5q33.3	protein_coding	0.685532	0.677702	1.19476	1.0896	2.83218	2.82784
Up	ENSG00000187474	1.91537	0.0179	FPR3	19q13.41	protein_coding	1.07276	0.670391	1.80967	1.78109	3.32788	3.16982
Up	ENSG00000177257	1.91354	0.00108	DEFB4B	8p23.1	protein_coding	0	0.363412	0	0	2.07206	1.93673
Up	ENSG00000182481	1.91336	0.000544	KPNA2	17q24.2	protein_coding	2.00392	1.96878	2.23144	2.15498	4.06178	3.94449
Up	ENSG00000197635	1.91276	0.00386	DPP4	2q24.2	protein_coding	0.505082	0.535184	1.0329	1.12619	2.71359	2.7116
Up	ENSG00000124491	1.9065	0.0021	F13A1	6p25.1	protein_coding	2.57027	2.53616	2.97494	3.00939	4.63431	4.72408
Up	ENSG00000244537	1.90263	0.0195	KRTAP4-2	17q21.2	protein_coding	0	0	0.819232	1.0891	2.52258	2.23685
Up	ENSG00000105427	1.8991	0.00257	CNFN	19q13.2	protein_coding	3.73862	4.06591	3.52227	3.49747	5.50538	5.70495
Up	ENSG00000105369	1.8984	0.000514	CD79A	19q13.2	protein_coding	0.0729774	0	0.227259	0.091289	1.9007	2.09187
Up	ENSG00000272804	1.89637	0.000283	KRTAP10-7	21q22.3	protein_coding	0	0.0908397	0.127965	0.126	1.89595	2.0692
Up	ENSG00000134757	1.89242	0.000583	DSG3	18q12.1	protein_coding	3.8033	3.81568	4.03132	4.05714	5.81806	5.82049
Up	ENSG00000162493	1.89145	0.000544	PDPN	1p36.21	protein_coding	0.960039	1.21166	1.05406	0.919954	2.92639	2.92937
Up	ENSG00000110077	1.88973	0.0484	MS4A6A	11q12.2	protein_coding	0.786455	1.19514	2.23513	2.36672	3.61888	3.45229
Up	ENSG00000143119	1.88698	0.0177	CD53	1p13.3	protein_coding	1.01301	1.10269	2.07345	1.938	3.40232	3.43522
Up	ENSG00000181333	1.88664	0.000973	HEPHL1	11q21	protein_coding	0.323535	0.275003	0.621969	0.573213	2.30024	2.36991
Up	ENSG00000111912	1.88654	0.00346	NCOA7	6q22.31	protein_coding	1.53303	1.44044	2.04656	1.96371	3.68471	3.58024
Up	ENSG00000278272	1.88637	0.00146	HIST1H3C	6p22.2	protein_coding	3.58795	3.3173	3.84215	3.57961	5.41764	5.5186
Up	ENSG00000041982	1.88189	0.0125	TNC	9q33.1	protein_coding	2.85747	2.70465	3.6527	3.58204	5.08511	5.0771
Up	ENSG00000006788	1.87207	0.000126	MYH13	17p13.1	protein_coding	0.101954	0.0418145	0.00938561	0.014956	1.9471	1.88109
Up	FAM46C	1.87118	0.000863	NA	NANA	NA	0.675239	0.698131	0.902497	0.994496	2.74289	2.63465
Up	ENSG00000169508	1.86163	0.000949	GPR183	13q32.3	protein_coding	1.57554	1.66126	1.9111	1.88665	3.65905	3.5815
Up	ENSG00000240871	1.86087	0.0454	KRTAP4-7	17q21.2	protein_coding	0	0	1.38317	1.15648	2.33612	2.65544
Up	ENSG00000163599	1.85754	0.000213	CTLA4	2q33.2	protein_coding	0.18261	0.112938	0.196117	0.281024	2.07412	2.02731
Up	FBN1	1.8539	0.00737	NA	NANA	NA	2.05072	2.08506	2.76806	2.74536	4.2489	4.2835
Up	ENSG00000103044	1.8516	0.00515	HAS3	16q22.1	protein_coding	1.81617	1.64938	1.30158	1.03567	3.34033	3.26428
Up	ENSG00000214518	1.85109	0.0389	KRTAP2-2	17q21.2	protein_coding	0	0	1.03353	1.36778	2.48713	2.41571
Up	ENSG00000171819	1.85016	0.0214	ANGPTL7	1p36.22	protein_coding	1.64984	1.51274	2.69531	2.41786	3.94642	3.89177
Up	ENSG00000161850	1.84954	0.0154	KRT82	12q13.13	protein_coding	0	0	1.00484	0.731766	2.23514	2.33224
Up	ENSG00000111796	1.84911	0.00096	KLRB1	12p13.31	protein_coding	0.364903	0.301771	0.251549	0.626923	2.19554	2.27526
Up	ENSG00000273703	1.84668	0.00285	HIST1H2BM	6p22.1	protein_coding	2.75255	2.84351	3.22008	2.79017	4.96381	4.5327
Up	ENSG00000110324	1.8421	0.0124	IL10RA	11q23.3	protein_coding	1.14502	0.869124	1.79649	1.80774	3.1728	3.32058
Up	ENSG00000138207	1.84163	0.00576	RBP4	10q23.33	protein_coding	0	0.306196	0.826267	0.622369	2.27714	2.28353
Up	ENSG00000062038	1.8378	0.0041	CDH3	16q22.1	protein_coding	3.09169	3.01605	2.60372	2.43225	4.61843	4.62902
Up	ENSG00000275713	1.83551	0.00096	HIST1H2BH	6p22.2	protein_coding	3.81637	3.84889	3.60793	3.52792	5.61775	5.45382
Up	ENSG00000225783	1.83491	0.000344	MIAT	22q12.1	lincRNA	0.589782	0.697583	0.733784	0.829824	2.52458	2.57074
Up	ENSG00000264424	1.83317	0.00034	MYH4	17p13.1	protein_coding	0.175433	0.129792	0.0140009	0.0228871	1.98678	1.85062
Up	ENSG00000163191	1.83131	0.00145	S100A11	1q21.3	protein_coding	6.02931	6.28932	6.49375	6.39999	8.20871	8.0601
Up	ENSG00000162366	1.82739	0.0298	PDZK1IP1	1p33	protein_coding	2.86417	2.8196	1.75537	1.74146	4.02234	4.22274
Up	ENSG00000100448	1.82535	0.00212	CTSG	14q12	protein_coding	1.54416	1.20706	1.01517	1.46137	3.18853	3.07606
Up	ENSG00000104267	1.82428	0.0145	CA2	8q21.2	protein_coding	2.99516	3.25657	2.26343	2.32973	4.63424	4.43677
Up	ENSG00000172215	1.82366	0.000155	CXCR6	3p21.31	protein_coding	1.19173	1.05998	1.13754	1.09943	2.95369	2.93795
Up	ENSG00000274750	1.80946	0.00399	HIST1H3E	6p22.2	protein_coding	2.43439	2.15046	1.79843	2.412	3.89363	4.12293
Up	ENSG00000129538	1.80879	0.0264	RNASE1	14q11.2	protein_coding	2.64754	2.60332	3.69383	3.64182	5.03836	4.87247
Up	ENSG00000197153	1.80852	0.00103	HIST1H3J	6p22.1	protein_coding	1.88357	2.2709	2.20125	2.12252	3.87398	3.98219
Up	ENSG00000057657	1.80271	0.00167	PRDM1	6q21	protein_coding	1.43152	1.3559	1.80436	1.73405	3.36761	3.40073
Up	ENSG00000104951	1.79889	0.00981	IL4I1	19q13.33	protein_coding	0.434594	0.294319	1.12176	1.05668	2.44681	2.60466
Up	ENSG00000163131	1.79523	0.0489	CTSS	1q21.3	protein_coding	1.62759	1.44708	2.85437	2.77028	3.9046	4.03552
Up	ENSG00000134057	1.79144	0.000459	CCNB1	5q13.2	protein_coding	1.02462	0.891519	1.01218	1.15925	2.80402	2.82265
Up	ENSG00000235162	1.7912	0.00193	C12orf75	12q23.3	protein_coding	1.38404	1.44165	0.996987	1.03164	3.02743	2.98213
Up	ENSG00000130775	1.78955	0.00605	THEMIS2	1p35.3	protein_coding	0.687234	0.749672	1.41398	1.18181	2.69538	2.90007
Up	ENSG00000197253	1.78669	0.00102	TPSB2	16p13.3	protein_coding	1.67526	1.67157	1.96336	1.97462	3.62781	3.58798
Up	ENSG00000180644	1.78634	0.00604	PRF1	10q22.1	protein_coding	0.0350463	0.212026	0.68943	0.754804	2.27044	2.1479
Up	ENSG00000275302	1.78538	0.00167	CCL4	17q12	protein_coding	0.149218	0.121914	0.59056	0.270537	2.12075	2.01613
Up	ENSG00000180879	1.78452	0.00104	SSR4	Xq28	protein_coding	3.90286	3.65737	4.04364	3.80173	5.56735	5.70448
Up	ENSG00000167772	1.78294	0.00257	ANGPTL4	19p13.2	protein_coding	1.04011	0.924893	1.4774	1.34541	3.00022	2.95956
Up	ENSG00000028137	1.78107	0.00492	TNFRSF1B	1p36.22	protein_coding	1.19785	1.14958	1.71935	1.75873	3.18345	3.29144
Up	ENSG00000140519	1.77401	0.00284	RHCG	15q26.1	protein_coding	0.632868	0.420921	0.998784	0.714106	2.60986	2.3215
Up	ENSG00000277775	1.76625	0.000878	HIST1H3F	6p22.2	protein_coding	3.74011	3.44778	3.55155	3.41041	5.35552	5.25191
Up	ENSG00000197641	1.7661	0.00265	SERPINB13	18q21.33	protein_coding	1.8288	2.1252	2.242	2.44967	3.90869	3.94636
Up	ENSG00000136250	1.7595	0.0546	AOAH	7p14.2	protein_coding	0.212581	0.166528	1.37883	1.59973	2.62512	2.57271
Up	ENSG00000142089	1.75902	0.0295	IFITM3	11p15.5	protein_coding	5.0672	5.08521	6.1397	6.12884	7.35324	7.37528
Up	ENSG00000160255	1.75666	0.0493	ITGB2	21q22.3	protein_coding	1.83546	1.56719	3.01309	2.87764	4.07389	4.08611
Up	ENSG00000243509	1.75382	0.00242	TNFRSF6B	20q13.33	protein_coding	1.47861	1.07866	1.05509	1.43974	2.89454	3.13915
Up	ENSG00000105639	1.75347	0.000781	JAK3	19p13.11	protein_coding	0.835205	0.614606	0.951114	0.873335	2.55178	2.59228
Up	ENSG00000121742	1.75095	0.0887	GJB6	13q12.11	protein_coding	2.74834	2.99931	4.45788	4.40322	5.41131	5.39496
Up	ENSG00000154096	1.74993	0.00758	THY1	11q23.3	protein_coding	1.35	1.38927	2.07514	1.96937	3.42788	3.46387
Up	ENSG00000275714	1.74696	0.00212	HIST1H3A	6p22.2	protein_coding	2.09727	2.30132	2.60478	2.21456	3.9394	4.16348
Up	ENSG00000151651	1.74632	0.00287	ADAM8	10q26.3	protein_coding	1.68115	1.16211	1.36364	1.09465	3.07102	3.0724
Up	ENSG00000126264	1.74536	0.029	HCST	19q13.12	protein_coding	0.828599	0.812402	1.71352	1.97245	3.00661	3.14759
Up	ENSG00000034510	1.74291	0.0266	TMSB10	2p11.2	protein_coding	6.76425	6.29156	7.55258	7.4007	8.7927	8.69766
Up	ENSG00000062716	1.73881	0.00449	VMP1	17q23.1	protein_coding	2.50273	2.57336	3.0791	3.07166	4.54078	4.55025
Up	ENSG00000276410	1.73264	0.0312	HIST1H2BB	6p22.2	protein_coding	1.35321	2.63773	2.60646	2.44352	3.93388	4.05186
Up	ENSG00000159403	1.72867	0.0361	C1R	12p13.31	protein_coding	3.70068	3.52786	4.76354	4.6758	5.89234	5.89895
Up	ENSG00000122122	1.72829	0.0193	SASH3	Xq26.1	protein_coding	0.400234	0.431732	1.4033	1.19494	2.64215	2.52954
Up	ENSG00000205364	1.72801	0.00201	MT1M	16q13	protein_coding	0.647209	0.822241	1.18029	0.977893	2.66551	2.60432
Up	ENSG00000104998	1.72556	0.000514	IL27RA	19p13.12	protein_coding	0.87436	0.802661	0.886577	1.04155	2.67685	2.57685
Up	ENSG00000160654	1.72201	0.0154	CD3G	11q23.3	protein_coding	0.136341	0.110825	1.02074	0.8403	2.35702	2.1411
Up	ENSG00000196805	1.72167	0.00348	SPRR2B	1q21.3	protein_coding	1.31054	1.72884	1.32807	1.25417	2.91085	3.34331
Up	ENSG00000188694	1.72116	0.000273	KRTAP24-1	21q22.11	protein_coding	0	0	0.105437	0.149016	1.81222	1.75732
Up	ENSG00000130429	1.71962	0.0013	ARPC1B	7q22.1	protein_coding	2.9575	2.58775	2.9385	2.77255	4.44304	4.62436
Up	ENSG00000138821	1.71624	0.0456	SLC39A8	4q24	protein_coding	0.992471	1.12106	2.26365	2.23613	3.4299	3.30923
Up	ENSG00000106484	1.71589	0.0212	MEST	7q32.2	protein_coding	0.810698	0.667908	1.69178	1.602	3.00262	2.81536
Up	ENSG00000212722	1.71424	0.0483	KRTAP4-9	17q21.2	protein_coding	0.0845203	0.0685261	1.33885	1.23461	2.28392	2.50781
Up	ENSG00000273542	1.71421	0.00422	HIST1H4K	6p22.1	protein_coding	4.37233	3.95711	4.68516	4.31776	6.0888	6.00581
Up	ENSG00000115919	1.71236	0.00201	KYNU	2q22.2	protein_coding	0.48965	0.492749	0.807563	0.907716	2.46668	2.30688
Up	ENSG00000149573	1.71154	0.00698	MPZL2	11q23.3	protein_coding	2.60101	2.55482	3.15348	3.24082	4.62531	4.57284
Up	ENSG00000106538	1.7042	0.0107	RARRES2	7q36.1	protein_coding	1.22703	1.7656	2.22546	1.56371	3.37731	3.42199
Up	ENSG00000103187	1.70365	0.0634	COTL1	16q24.1	protein_coding	1.75815	1.43027	2.92438	2.90257	3.92148	3.9935
Up	ENSG00000105755	1.69969	0.00334	ETHE1	19q13.31	protein_coding	1.46279	1.40266	1.53574	1.97986	3.38294	3.20697
Up	ENSG00000172236	1.69302	0.00345	TPSAB1	16p13.3	protein_coding	1.54401	1.35138	1.98825	1.73282	3.3854	3.30886
Up	ENSG00000019169	1.69041	0.00067	MARCO	2q14.2	protein_coding	0.0486943	0.0393111	0.29299	0.232127	1.84504	1.84233
Up	CTSL1	1.69024	0.00513	NA	NANA	NA	1.65311	1.85955	2.31968	2.25645	3.72297	3.7019
Up	ENSG00000276903	1.68785	0.0046	HIST1H2AL	6p22.1	protein_coding	2.97872	3.18818	3.53556	3.58963	5.12645	4.8953
Up	ENSG00000166741	1.68669	0.00102	NNMT	11q23.2	protein_coding	1.43171	1.22289	1.60567	1.44019	3.07211	3.1515
Up	ENSG00000109971	1.68606	0.00121	HSPA8	11q24.1	protein_coding	5.7901	5.77667	6.12	5.97306	7.67766	7.52438
Up	ENSG00000197079	1.68471	0.00205	KRT35	17q21.2	protein_coding	1.24326	1.37277	1.61774	1.72106	3.1204	3.22645
Up	ENSG00000186818	1.68334	0.00376	LILRB4	19q13.42	protein_coding	0.0703024	0.164153	0.622661	0.573237	2.00996	2.07189
Up	ENSG00000182866	1.68295	0.0135	LCK	1p35.2	protein_coding	0.527924	0.281033	1.24544	1.04604	2.47995	2.43616
Up	ENSG00000005249	1.68081	0.00822	PRKAR2B	7q22.3	protein_coding	0.704805	0.804043	1.4744	1.29831	2.78784	2.71457
Up	ENSG00000153234	1.67674	0.00121	NR4A2	2q24.1	protein_coding	0.42676	0.556066	0.725219	0.781381	2.38087	2.21731
Up	ENSG00000155926	1.6751	0.00121	SLA	8q24.22	protein_coding	1.06068	1.06226	1.22445	1.40893	2.92962	2.79873
Up	ENSG00000174946	1.67401	0.00096	GPR171	3q25.1	protein_coding	0.357523	0.117515	0.477204	0.331385	2.02668	1.96316
Up	ENSG00000197238	1.67342	0.00292	HIST1H4J	6p22.1	protein_coding	4.43109	4.00322	4.6012	4.35855	6.06432	5.97955
Up	ENSG00000125538	1.67327	0.00114	IL1B	2q14.1	protein_coding	0.0604401	0.186241	0.153668	0.446583	1.91435	1.85566
Up	ENSG00000162772	1.67314	0.00612	ATF3	1q32.3	protein_coding	0.849361	0.895342	1.54897	1.27785	2.7526	2.87944
Up	ENSG00000026751	1.67251	0.0719	SLAMF7	1q23.3	protein_coding	0.352525	0.138377	1.56773	1.66265	2.60603	2.59963
Up	ENSG00000187838	1.67036	0.0447	PLSCR3	17p13.1	protein_coding	0.526666	0.00038764	1.17277	1.49973	2.43056	2.50993
Up	ENSG00000212935	1.67028	0.000868	KRTAP10-3	21q22.3	protein_coding	0	0.208665	0.252319	0.285021	1.77851	1.93505
Up	ENSG00000111799	1.66889	0.0144	COL12A1	6q14.1	protein_coding	2.11193	1.94984	2.83394	2.77536	4.04746	4.12584
Up	ENSG00000206301	1.66696	0.000544	HLA-DQA2	CHR_HSCHR6_MHC_MCF_CTG1	protein_coding	2.33809	2.38079	2.41868	2.54579	4.00416	4.17142
Up	ENSG00000143226	1.66131	0.0417	FCGR2A	1q23.3	protein_coding	0.901627	1.07635	2.06992	2.14276	3.23687	3.18107
Up	ENSG00000138615	1.65842	0.00167	CILP	15q22.31	protein_coding	0.462378	0.452682	0.770561	0.829088	2.26366	2.31053
Up	ENSG00000188643	1.65666	0.000344	S100A16	1q21.3	protein_coding	4.71187	4.75817	4.5783	4.59932	6.32118	6.31596
Up	ENSG00000221859	1.65663	0.00126	KRTAP10-10	21q22.3	protein_coding	0.240015	0.0685261	0.440997	0.423843	1.97232	1.92763
Up	ENSG00000171396	1.65534	0.0131	KRTAP4-4	17q21.2	protein_coding	0	0	0.740574	0.74969	1.9469	2.10892
Up	ENSG00000175063	1.65225	0.00714	UBE2C	20q13.12	protein_coding	1.38937	0.826496	1.51261	1.61009	2.99363	2.98014
Up	ENSG00000115963	1.65184	0.00265	RND3	2q23.3	protein_coding	2.42863	2.70849	2.836	2.99538	4.35363	4.43431
Up	ENSG00000164733	1.64534	0.00344	CTSB	8p23.1	protein_coding	3.77084	3.63831	4.19844	4.09674	5.54705	5.59579
Up	ENSG00000137975	1.63874	0.0204	CLCA2	1p22.3	protein_coding	3.46285	3.67946	4.39092	4.46013	5.63814	5.63602
Up	ENSG00000092009	1.6368	0.00102	CMA1	14q12	protein_coding	0.441396	0.590824	0.306464	0.326216	1.95136	2.1547
Up	ENSG00000078081	1.63336	0.082	LAMP3	3q27.1	protein_coding	1.25147	1.22306	2.61031	2.69266	3.56111	3.59437
Up	ENSG00000118971	1.63142	0.0013	CCND2	12p13.32	protein_coding	2.7994	2.79855	3.06582	3.12813	4.62042	4.53838
Up	ENSG00000198821	1.62934	0.00313	CD247	1q24.2	protein_coding	0.249363	0.204158	0.605104	0.695356	2.13389	2.00178
Up	ENSG00000179388	1.6259	0.00026	EGR3	8p21.3	protein_coding	2.42553	2.56358	2.55772	2.54962	4.17101	4.12902
Up	ENSG00000274641	1.62586	0.00249	HIST1H2BO	6p22.1	protein_coding	2.96794	3.04791	3.4799	3.27063	4.82736	4.80756
Up	ENSG00000163032	1.62272	0.000544	VSNL1	2p24.2	protein_coding	1.97612	2.02282	2.14339	2.15584	3.77361	3.62091
Up	ENSG00000153563	1.62078	0.021	CD8A	2p11.2	protein_coding	0.200296	0.161653	0.991066	1.0977	2.28468	2.18223
Up	ENSG00000203852	1.61856	0.00335	HIST2H3A	1q21.2	protein_coding	3.62549	3.08361	3.24742	3.07223	4.8643	4.88719
Up	ENSG00000164647	1.61276	0.00345	STEAP1	7q21.13	protein_coding	0.136122	0.544321	0.634967	0.679518	2.0155	2.20748
Up	ENSG00000203811	1.61213	0.00325	HIST2H3C	1q21.2	protein_coding	3.62549	3.08361	3.24742	3.08732	4.8643	4.88187
Up	ENSG00000197766	1.61126	0.0166	CFD	19p13.3	protein_coding	3.7209	3.3972	4.37076	4.19539	5.38389	5.68076
Up	ENSG00000160888	1.61059	0.00604	IER2	19p13.13	protein_coding	2.90231	2.73913	2.18422	2.4559	4.11429	4.24767
Up	ENSG00000271503	1.60941	0.00482	CCL5	17q12	protein_coding	2.4684	1.94793	2.63201	2.41355	4.01711	3.93266
Up	ENSG00000110876	1.60844	0.0236	SELPLG	12q24.11	protein_coding	0.700649	0.855724	1.73927	1.58097	2.86272	2.79247
Up	ENSG00000162692	1.6059	0.0477	VCAM1	1p21.2	protein_coding	1.09953	1.15434	2.23485	2.2948	3.27762	3.32594
Up	ENSG00000112149	1.60535	0.0407	CD83	6p23	protein_coding	1.35621	0.940897	2.06088	2.28501	3.25838	3.27381
Up	AMICA1	1.60501	0.0164	NA	NANA	NA	1.11082	1.3774	2.04821	1.9579	3.16311	3.29406
Up	ATP5E	1.60485	0.0123	NA	NANA	NA	4.26918	4.43391	5.16524	4.82303	6.38985	6.16552
Up	ENSG00000086300	1.60266	0.0184	SNX10	7p15.2	protein_coding	0.278853	0.354193	0.983786	1.24108	2.36883	2.26545
Up	ENSG00000163435	1.59977	0.0105	ELF3	1q32.1	protein_coding	0.370019	0.460476	1.12232	1.02446	2.27202	2.41616
Up	ENSG00000248485	1.59706	0.0188	PCP4L1	1q23.3	protein_coding	0.859288	0.934048	1.5662	1.82043	2.82562	2.95849
Up	ENSG00000167676	1.597	0.00125	PLIN4	19p13.3	protein_coding	1.72853	1.50759	1.91791	1.73635	3.33342	3.30578
Up	ENSG00000182898	1.59403	0.00145	TCHHL1	1q21.3	protein_coding	0.0241123	0.0761155	0.220835	0.31881	1.60809	1.89991
Up	ENSG00000204880	1.59319	0.0195	KRTAP4-8	17q21.2	protein_coding	0	0	0.779792	0.871124	1.9598	2.05204
Up	ENSG00000163519	1.59227	0.00193	TRAT1	3q13.13	protein_coding	0	0.0843384	0.31664	0.442866	1.81405	1.79242
Up	ENSG00000135046	1.58955	0.0127	ANXA1	9q21.13	protein_coding	5.40499	5.32736	4.66305	4.64498	6.63567	6.56362
Up	ENSG00000081320	1.58711	0.0309	STK17B	2q32.3	protein_coding	1.673	1.9182	2.71556	2.77381	3.90121	3.81328
Up	ENSG00000140416	1.58641	0.0205	TPM1	15q22.2	protein_coding	4.36917	4.03962	5.06952	4.95108	6.22055	6.16696
Up	ENSG00000159388	1.58616	0.00165	BTG2	1q32.1	protein_coding	3.7076	3.62533	3.37237	3.32206	5.10381	5.08218
Up	ENSG00000134028	1.58536	0.000579	ADAMDEC1	8p21.2	protein_coding	0	0.031993	0.164826	0.219008	1.65389	1.72474
Up	ENSG00000172061	1.58017	0.0169	LRRC15	3q29	protein_coding	0.543838	0.543638	1.24491	1.39823	2.48033	2.54532
Up	ENSG00000273884	1.57994	0.000153	LILRA3	CHR_HSCHR19LRC_COX2_CTG3_1	protein_coding	0	0	0.0441742	0.0752061	1.59693	1.62265
Up	ENSG00000170312	1.5786	0.00073	CDK1	10q21.2	protein_coding	1.24574	0.997905	1.19429	1.27361	2.75504	2.75793
Up	ENSG00000273983	1.57627	0.000344	HIST1H3G	6p22.2	protein_coding	3.16763	3.17737	3.28049	3.32331	4.84788	4.77906
Up	ENSG00000115758	1.57483	0.00167	ODC1	2p25.1	protein_coding	1.71024	1.9362	2.10328	2.1167	3.56261	3.52026
Up	ENSG00000205867	1.5739	0.000763	KRTAP5-2	11p15.5	protein_coding	0.0830242	0.0673011	0.303321	0.223578	1.67513	1.81127
Up	ENSG00000143320	1.56962	0.000283	CRABP2	1q23.1	protein_coding	4.19014	4.05275	4.0439	4.11854	5.65437	5.68755
Up	ENSG00000143384	1.56923	0.00126	MCL1	1q21.2	protein_coding	4.17307	4.19994	4.45085	4.49442	5.89836	5.89924
Up	ENSG00000227300	1.56798	0.000962	KRT16P2	17p11.2	transcribed_unprocessed_pseudogene	1.30858	1.17776	1.02964	0.999864	2.69413	2.69974
Up	ENSG00000005001	1.56691	0.00613	PRSS22	16p13.3	protein_coding	1.42091	0.98244	0.893271	0.752845	2.42565	2.73291
Up	ENSG00000137801	1.56523	0.0574	THBS1	15q14	protein_coding	2.34624	2.36784	3.63041	3.44087	4.52992	4.49322
Up	ENSG00000120694	1.56387	0.00102	HSPH1	13q12.3	protein_coding	2.4379	2.34181	2.12673	2.16464	3.83331	3.82998
Up	ENSG00000167656	1.56297	0.0609	LY6D	8q24.3	protein_coding	6.38466	6.22631	5.09166	5.10967	7.29194	7.24015
Up	ENSG00000108691	1.56185	0.0546	CCL2	17q12	protein_coding	2.28942	2.34008	3.53695	3.41023	4.46492	4.44713
Up	ENSG00000125148	1.56086	0.000789	MT2A	16q13	protein_coding	4.78751	5.003	5.08466	4.94071	6.5405	6.48916
Up	ENSG00000170801	1.55962	0.00104	HTRA3	4p16.1	protein_coding	0.616761	0.646514	0.881049	0.875882	2.26434	2.36501
Up	ENSG00000185811	1.55816	0.014	IKZF1	7p12.2	protein_coding	0.470054	0.593172	1.18691	1.29858	2.49998	2.3907
Up	ENSG00000090659	1.55807	0.00222	CD209	19p13.2	protein_coding	0.32171	0.185145	0.683452	0.438352	1.94387	1.98659
Up	ENSG00000196866	1.55678	0.00939	HIST1H2AD	6p22.2	protein_coding	2.56387	2.8338	3.37531	3.18423	4.60041	4.49176
Up	ENSG00000129226	1.55564	0.0447	CD68	17p13.1	protein_coding	1.61791	1.50219	2.59048	2.67799	3.64172	3.66385
Up	ENSG00000087245	1.55555	0.00803	MMP2	16q12.2	protein_coding	3.31653	3.19239	3.88286	3.79395	5.06866	5.13531
Up	ENSG00000182326	1.55552	0.055	C1S	12p13.31	protein_coding	3.26393	3.35152	4.45484	4.47933	5.42085	5.465
Up	ENSG00000100450	1.55208	0.059	GZMH	14q12	protein_coding	0.26392	0	1.20179	1.38705	2.20014	2.3304
Up	ENSG00000161405	1.5516	0.00466	IKZF3	17q21.1	protein_coding	0.850708	0.553816	1.10949	1.1689	2.48449	2.46017
Up	ENSG00000102879	1.55127	0.00893	CORO1A	16p11.2	protein_coding	2.13418	1.95401	2.68387	2.60687	3.9152	3.87682
Up	ENSG00000130303	1.55079	0.042	BST2	19p13.11	protein_coding	1.33293	1.26365	2.16452	2.4827	3.31419	3.40928
Up	ENSG00000171401	1.54932	0.00726	KRT13	17q21.2	protein_coding	0.533179	0.735309	0.035094	0.277575	1.78986	2.09936
Up	ENSG00000115085	1.54746	0.00641	ZAP70	2q11.2	protein_coding	0.533575	0.53931	1.10252	1.01124	2.45285	2.23539
Up	ENSG00000115956	1.5432	0.056	PLEK	2p14	protein_coding	0.699194	0.743449	1.89968	1.85683	2.79595	2.89004
Up	ENSG00000221837	1.54306	0.00121	KRTAP10-9	21q22.3	protein_coding	0.0731037	0.223448	0.0954039	0.2344	1.5341	1.86521
Up	ENSG00000185664	1.54237	0.0898	PMEL	12q13.2	protein_coding	3.39582	3.1611	1.97171	1.83804	4.14012	4.12796
Up	ENSG00000163993	1.54186	0.0326	S100P	4p16.1	protein_coding	1.15817	0.459482	1.56211	1.55054	2.48431	2.96456
Up	ENSG00000107165	1.54106	0.00299	TYRP1	9p23	protein_coding	3.89702	3.98698	3.4901	3.61057	5.30748	5.26697
Up	ENSG00000100911	1.53843	0.0316	PSME2	14q12	protein_coding	4.34026	3.73406	4.89545	4.86512	5.97603	6.01828
Up	ENSG00000168461	1.53715	0.00888	RAB31	18p11.22	protein_coding	1.46321	1.5294	2.11747	2.09268	3.33191	3.34378
Up	ENSG00000111341	1.53526	0.0587	MGP	12p12.3	protein_coding	2.14263	1.77246	3.05999	3.13816	4.07788	4.04926
Up	APOBEC3A_B	1.53453	0.000305	NA	NANA	NA	0.097353	0.144422	0.118157	0.0171424	1.57505	1.68256
Up	ENSG00000188404	1.5327	0.00602	SELL	1q24.2	protein_coding	0.0791368	0.154947	0.565999	0.697422	1.94372	1.87044
Up	ENSG00000100097	1.53245	0.00482	LGALS1	22q13.1	protein_coding	4.59934	4.69726	5.14973	5.10286	6.45298	6.38652
Up	ENSG00000274997	1.53078	0.00106	HIST1H2AH	6p22.1	protein_coding	3.64397	3.31339	3.37353	3.43117	5.0082	4.93439
Up	ENSG00000167759	1.52899	0.00501	KLK13	19q13.41	protein_coding	1.49364	1.62774	1.15598	1.13971	3.06175	2.70476
Up	ENSG00000100368	1.52878	0.00692	CSF2RB	22q12.3	protein_coding	1.41986	1.25458	1.82052	1.9264	3.14675	3.12149
Up	LINC00152	1.5285	0.0449	NA	NANA	NA	0.23037	0.970745	1.50757	1.52835	2.66664	2.50887
Up	ENSG00000059728	1.52695	0.0024	MXD1	2p13.3	protein_coding	1.11346	1.17075	1.45613	1.54898	2.83308	2.86549
Up	ENSG00000127241	1.52421	0.000757	MASP1	3q27.3	protein_coding	0.533081	0.505642	0.770221	0.633778	2.11311	2.15667
Up	ENSG00000013725	1.52407	0.0017	CD6	11q12.2	protein_coding	0.313798	0.325485	0.650536	0.616545	1.95292	2.04841
Up	ENSG00000119508	1.52171	0.00179	NR4A3	9q31.1	protein_coding	0.274598	0.258307	0.574465	0.611989	1.94988	1.95322
Up	ENSG00000270276	1.51936	0.00213	HIST2H4B	1q21.2	protein_coding	4.84335	4.49205	4.47227	4.4181	6.15214	5.99947
Up	ENSG00000147257	1.51701	0.000764	GPC3	Xq26.2	protein_coding	1.34063	1.06916	1.18949	1.17316	2.76771	2.65254
Up	ENSG00000140379	1.51654	0.00454	BCL2A1	15q25.1	protein_coding	0.107416	0.087326	0.545228	0.567412	1.91485	1.77192
Up	ENSG00000131747	1.51548	0.00102	TOP2A	17q21.2	protein_coding	1.65756	1.75474	1.93248	1.93753	3.37197	3.30015
Up	ENSG00000147443	1.51311	0.00789	DOK2	8p21.3	protein_coding	0.440302	0.396079	1.02166	0.885183	2.06959	2.32825
Up	ENSG00000169403	1.51306	0.00193	PTAFR	1p35.3	protein_coding	0.606437	0.44657	0.908696	0.711738	2.18439	2.17845
Up	ENSG00000197019	1.51016	0.00537	SERTAD1	19q13.2	protein_coding	1.51237	1.23964	1.05346	0.897842	2.54444	2.82754
Up	ENSG00000166920	1.50849	0.000344	C15orf48	15q21.1	protein_coding	1.76284	1.84787	1.72724	1.67934	3.29691	3.22873
Up	ENSG00000101670	1.50747	0.00121	LIPG	18q21.1	protein_coding	0.336488	0.383895	0.525139	0.649099	2.05986	1.9024
Up	ENSG00000074800	1.50584	0.00124	ENO1	1p36.23	protein_coding	5.67844	5.56472	5.88445	5.86714	7.28966	7.21939
Up	ENSG00000163430	1.50376	0.00449	FSTL1	3q13.33	protein_coding	3.34127	3.26997	3.77667	3.75111	5.00128	5.07575
Up	ENSG00000141668	1.4976	0.0456	CBLN2	18q22.3	protein_coding	0.0888607	0.071859	1.0955	1.15016	2.04426	2.15413
Up	ENSG00000111348	1.49639	0.0314	ARHGDIB	12p12.3	protein_coding	3.405	3.50837	4.33984	4.40075	5.41116	5.40859
Up	ENSG00000075618	1.49322	0.00121	FSCN1	7p22.1	protein_coding	3.10374	2.7595	2.97927	2.91067	4.36349	4.49954
Up	ENSG00000230006	1.49221	0.000515	ANKRD36BP2	2p11.2	transcribed_unprocessed_pseudogene	0.51276	0.537467	0.563706	0.714427	2.05335	2.09525
Up	ENSG00000029153	1.49011	0.00204	ARNTL2	12p11.23	protein_coding	1.06632	1.06307	1.4288	1.36415	2.75726	2.68413
Up	ENSG00000171314	1.48845	0.000544	PGAM1	10q24.1	protein_coding	4.29065	4.22166	4.12111	4.07923	5.67798	5.65525
Up	ENSG00000169715	1.48564	0.00386	MT1E	16q13	protein_coding	3.54336	3.72868	3.13627	3.41431	4.91148	4.97111
Up	ENSG00000173762	1.48486	0.00872	CD7	17q25.3	protein_coding	0.204493	0.166957	0.617314	0.828002	1.81337	2.06472
Up	ENSG00000140511	1.48266	0.0521	HAPLN3	15q26.1	protein_coding	1.09002	0.783437	2.0017	1.99361	2.91931	2.9804
Up	ENSG00000115935	1.48137	0.0218	WIPF1	2q31.1	protein_coding	1.36751	1.37994	2.11902	2.22739	3.28395	3.22573
Up	ENSG00000011465	1.47978	0.0201	DCN	12q21.33	protein_coding	4.7932	4.90408	5.59164	5.65407	6.70621	6.72484
Up	ENSG00000173334	1.47962	0.000781	TRIB1	8q24.13	protein_coding	1.83077	2.07388	1.87511	1.85691	3.33882	3.43874
Up	ENSG00000187116	1.47882	0.000713	LILRA5	19q13.42	protein_coding	0	0	0.21465	0.133004	1.61513	1.51634
Up	ENSG00000117090	1.47672	0.00186	SLAMF1	1q23.3	protein_coding	0.209659	0.0708473	0.495919	0.35924	1.79352	1.72775
Up	ENSG00000010610	1.47449	0.0439	CD4	12p13.31	protein_coding	1.43444	1.27324	2.44752	2.25951	3.35254	3.3038
Up	ENSG00000108821	1.47228	0.00133	COL1A1	17q21.33	protein_coding	6.27382	6.01818	6.30414	6.37285	7.67301	7.75604
Up	ENSG00000166482	1.46568	0.000891	MFAP4	17p11.2	protein_coding	2.43793	2.49111	2.65328	2.64218	3.9465	4.09711
Up	ENSG00000186827	1.46527	0.000636	TNFRSF4	1p36.33	protein_coding	0.0841831	0.195767	0.211945	0.267899	1.57022	1.74021
Up	ENSG00000104972	1.46516	0.00166	LILRB1	19q13.42	protein_coding	0.146786	0.110133	0.261388	0.476421	1.64716	1.78052
Up	ENSG00000204571	1.46314	0.000211	KRTAP5-11	11q13.4	protein_coding	0	0.0744757	0	0	1.50226	1.46127
Up	ENSG00000275379	1.4598	0.000636	HIST1H3I	6p22.1	protein_coding	2.98416	2.89557	2.75542	2.95021	4.38138	4.3309
Up	ENSG00000119185	1.45619	0.00234	ITGB1BP1	2p25.1	protein_coding	1.70431	1.98352	1.57493	1.70771	3.07151	3.32611
Up	ENSG00000196747	1.45577	0.00156	HIST1H2AI	6p22.1	protein_coding	4.10621	3.94985	3.799	3.73357	5.38128	5.32459
Up	ENSG00000163207	1.45521	0.00193	IVL	1q21.3	protein_coding	3.28655	3.61164	3.65484	3.66754	4.95703	5.06368
Up	ENSG00000101347	1.45414	0.0385	SAMHD1	20q11.23	protein_coding	2.46356	2.69147	3.57691	3.45391	4.46496	4.53626
Up	ENSG00000122176	1.45228	0.00223	FMOD	1q32.1	protein_coding	1.64682	1.63631	1.96271	1.9987	3.27988	3.24695
Up	ENSG00000116791	1.45181	0.00313	CRYZ	1p31.1	protein_coding	1.6954	1.8343	1.53862	1.3266	3.11659	2.98448
Up	ENSG00000138166	1.44798	0.00432	DUSP5	10q25.2	protein_coding	1.35735	1.14849	1.64449	1.68039	2.86208	2.94924
Up	ENSG00000213416	1.44746	0.0917	KRTAP4-12	17q21.2	protein_coding	0.168465	0	1.30751	1.45555	2.10539	2.2553
Up	ENSG00000135917	1.44242	0.00026	SLC19A3	2q36.3	protein_coding	0.595484	0.579259	0.638909	0.539638	1.98697	2.07452
Up	IL8	1.43931	0.00026	NA	NANA	NA	0	0.123967	0.0687013	0.0593576	1.51039	1.49425
Up	ENSG00000123610	1.43887	0.00314	TNFAIP6	2q23.3	protein_coding	0.124937	0.241384	0.471245	0.620176	1.80185	1.80476
Up	ENSG00000241233	1.4387	0.000516	KRTAP5-8	11q13.4	protein_coding	0.289623	0.123786	0.150185	0.0880014	1.61003	1.59317
Up	ENSG00000010327	1.43463	0.0292	STAB1	3p21.1	protein_coding	1.49801	1.21067	2.22634	2.14598	3.2077	3.20205
Up	ENSG00000141526	1.43428	0.000424	SLC16A3	17q25.3	protein_coding	0.520506	0.522695	0.527364	0.67543	1.9721	2.01946
Up	ENSG00000198959	1.43153	0.000909	TGM2	20q11.23	protein_coding	0.263911	0.120172	0.40404	0.325178	1.68346	1.73626
Up	ENSG00000168542	1.42249	0.00177	COL3A1	2q32.2	protein_coding	6.36556	6.03305	6.40085	6.37443	7.69859	7.73333
Up	ENSG00000185130	1.42128	0.00216	HIST1H2BL	6p22.1	protein_coding	2.85772	2.95956	2.67853	2.96415	4.45222	4.12032
Up	ENSG00000104549	1.41782	0.00888	SQLE	8q24.13	protein_coding	2.13029	2.23352	2.75766	2.71345	3.83756	3.91554
Up	ENSG00000198417	1.41389	0.0228	MT1F	16q13	protein_coding	1.61784	1.24985	0.813302	0.62003	2.44289	2.53539
Up	ENSG00000110934	1.41241	0.0395	BIN2	12q13.13	protein_coding	0.388895	0.42151	1.37029	1.30879	2.31469	2.25487
Up	ENSG00000110719	1.41187	0.00126	TCIRG1	11q13.2	protein_coding	2.07386	1.80869	2.13478	2.03412	3.38129	3.46817
Up	ENSG00000115165	1.41127	0.0111	CYTIP	2q24.1	protein_coding	1.33317	1.16659	1.74075	1.91887	2.94119	2.96105
Up	ENSG00000276180	1.41102	0.0142	HIST1H4I	6p22.1	protein_coding	2.49318	2.13311	3.04489	2.52283	4.03789	3.88116
Up	ENSG00000204869	1.40949	0.0118	IGFL4	19q13.32	protein_coding	0.481549	0.806919	0	0.379034	1.67186	1.98087
Up	ENSG00000087086	1.40546	0.00485	FTL	19q13.33	protein_coding	6.26484	6.05497	6.55254	6.59928	7.80326	7.74347
Up	ENSG00000102802	1.4049	0.0014	MEDAG	13q12.3	protein_coding	0.361641	0.321838	0.527227	0.651113	1.89462	1.84608
Up	ENSG00000175130	1.40438	0.00492	MARCKSL1	1p35.1	protein_coding	2.46232	2.26295	2.76478	2.80615	3.99585	3.96101
Up	ENSG00000170542	1.40061	0.00869	SERPINB9	6p25.2	protein_coding	1.48071	1.116	1.85538	1.67137	2.97028	2.89268
Up	ENSG00000005844	1.40033	0.0938	ITGAL	16p11.2	protein_coding	0.412224	0.298028	1.72042	1.53055	2.37509	2.40618
Up	ENSG00000274290	1.39857	0.00113	HIST1H2BE	6p22.2	protein_coding	3.42135	3.18928	3.37499	3.14995	4.70632	4.65861
Up	ENSG00000132432	1.39531	0.0448	SEC61G	7p11.2	protein_coding	2.21925	2.64132	3.38446	3.25657	4.42442	4.117
Up	ENSG00000091490	1.39362	0.0118	SEL1L3	4p15.2	protein_coding	0.811486	0.794338	1.39423	1.42308	2.53586	2.46294
Up	ENSG00000196950	1.39297	0.0315	SLC39A10	2q32.3	protein_coding	1.464	1.59431	2.31949	2.42798	3.36755	3.32129
Up	ENSG00000164032	1.39294	0.000636	H2AFZ	4q23	protein_coding	3.33588	3.16617	3.28391	3.26329	4.73532	4.57519
Up	ENSG00000100055	1.39186	0.0841	CYTH4	22q13.1	protein_coding	0.663363	0.600403	1.90731	1.77712	2.56086	2.69696
Up	ENSG00000100979	1.39089	0.00848	PLTP	20q13.12	protein_coding	3.17849	3.24506	2.79645	2.59452	4.38599	4.30304
Up	ENSG00000110079	1.39019	0.000642	MS4A4A	11q12.2	protein_coding	0.206794	0.313317	0.437309	0.338345	1.74474	1.68352
Up	ENSG00000135218	1.38931	0.034	CD36	7q21.11	protein_coding	1.87164	1.69709	2.62837	2.67222	3.61433	3.59895
Up	ENSG00000154736	1.38831	0.011	ADAMTS5	21q21.3	protein_coding	0.674104	0.748806	1.34273	1.25407	2.37027	2.4162
Up	ENSG00000006625	1.38818	0.0107	GGCT	7p14.3	protein_coding	2.50235	2.59999	3.14076	3.11454	4.17557	4.27961
Up	ENSG00000113263	1.38747	0.00586	ITK	5q33.3	protein_coding	0.221343	0.315268	0.754303	0.699327	1.9402	1.82987
Up	ENSG00000124635	1.38454	0.0132	HIST1H2BJ	6p22.1	protein_coding	3.30128	3.38061	3.59122	4.10933	4.99652	4.96378
Up	ENSG00000184584	1.38446	0.00288	TMEM173	5q31.2	protein_coding	1.89493	1.81118	2.1298	2.25783	3.41515	3.40065
Up	ENSG00000180353	1.38302	0.0564	HCLS1	3q13.33	protein_coding	1.39513	1.28396	2.26637	2.46849	3.2176	3.25541
Up	ENSG00000027697	1.38179	0.00422	IFNGR1	6q23.3	protein_coding	3.28761	3.36427	3.7038	3.763	4.94199	4.88093
Up	ENSG00000181617	1.38063	0.000213	FDCSP	4q13.3	protein_coding	0	0	0	0	1.33393	1.42733
Up	ENSG00000196156	1.38022	0.00121	KRTAP4-3	17q21.2	protein_coding	0	0	0.192333	0.267985	1.46551	1.52509
Up	ENSG00000124610	1.3796	0.00489	HIST1H1A	6p22.2	protein_coding	1.28586	1.41718	1.75608	1.65128	3.07043	2.74398
Up	ENSG00000090266	1.37857	0.00455	NDUFB2	7q34	protein_coding	3.40837	3.05171	3.17517	2.93874	4.69514	4.349
Up	ENSG00000167553	1.3775	0.00863	TUBA1C	12q13.12	protein_coding	4.67893	4.89394	5.28285	5.29989	6.49502	6.33779
Up	ENSG00000187840	1.37725	0.00127	EIF4EBP1	8p11.23	protein_coding	1.73466	1.58948	1.48665	1.39938	2.92965	2.92994
Up	ENSG00000177954	1.37023	0.000514	RPS27	1q21.3	protein_coding	8.05317	8.09905	8.02268	8.12113	9.52684	9.36164
Up	ENSG00000112116	1.36918	0.000213	IL17F	6p12.2	protein_coding	0	0	0	0	1.32487	1.4135
Up	ENSG00000156127	1.36894	0.00324	BATF	14q24.3	protein_coding	0.590485	0.493776	0.81761	0.408614	2.09514	1.79798
Up	ENSG00000273802	1.36875	0.00432	HIST1H2BG	6p22.2	protein_coding	3.62396	3.80732	3.96102	4.18367	5.22084	5.30464
Up	ENSG00000101265	1.36763	0.0237	RASSF2	20p13	protein_coding	1.42991	1.28366	2.14554	2.07343	3.12733	3.07421
Up	ENSG00000163600	1.36744	0.00167	ICOS	2q33.2	protein_coding	0.0332173	0.129129	0.384131	0.291084	1.52329	1.63037
Up	ENSG00000088882	1.36527	0.00177	CPXM1	20p13	protein_coding	0.524409	0.804433	0.882433	0.675368	2.01669	2.15717
Up	ENSG00000275126	1.36342	0.00166	HIST1H4L	6p22.1	protein_coding	2.52324	2.87512	2.64282	2.58828	4.07893	3.96264
Up	ENSG00000108829	1.36273	0.00206	LRRC59	17q21.33	protein_coding	2.03932	2.19589	2.40407	2.37522	3.55198	3.68072
Up	ENSG00000166128	1.36207	0.0354	RAB8B	15q22.2	protein_coding	1.04327	1.15629	1.92558	1.99988	2.93046	2.85619
Up	ENSG00000118503	1.36193	0.0013	TNFAIP3	6q23.3	protein_coding	2.47806	2.31473	2.29106	2.12797	3.6506	3.67916
Up	ENSG00000177675	1.3618	0.00257	CD163L1	12p13.31	protein_coding	0.395662	0.385509	0.717942	0.718427	1.86205	1.97032
Up	ENSG00000163170	1.35747	0.01	BOLA3	2p13.1	protein_coding	1.30424	1.25646	1.84495	1.43943	3.04132	2.59616
Up	ENSG00000104635	1.3571	0.00267	SLC39A14	8p21.3	protein_coding	1.72865	1.4536	1.29859	1.35445	2.87262	2.75923
Up	ENSG00000136997	1.35685	0.0268	MYC	8q24.21	protein_coding	3.72515	3.60246	2.96508	2.80921	4.62185	4.6428
Up	ENSG00000186393	1.35613	0.00242	KRT26	17q21.2	protein_coding	0.101868	0.0418604	0.365174	0.412242	1.54681	1.62601
Up	ENSG00000107833	1.35586	0.0157	NPM3	10q24.32	protein_coding	1.84209	1.40298	1.29169	0.950318	2.62036	2.8349
Up	ENSG00000164692	1.35566	0.00267	COL1A2	7q21.3	protein_coding	5.87672	5.63883	6.02246	6.07481	7.23252	7.28521
Up	ENSG00000221869	1.35482	0.00167	CEBPD	8q11.21	protein_coding	3.15114	2.81921	2.91146	2.90642	4.21195	4.3918
Up	ENSG00000198271	1.35381	0.0151	KRTAP4-5	17q21.2	protein_coding	0	0.0882487	0.524493	0.763282	1.58641	1.80922
Up	ENSG00000142619	1.35267	0.00369	PADI3	1p36.13	protein_coding	0.298295	0.335183	0.723728	0.672849	1.88273	1.83762
Up	ENSG00000243489	1.34966	0.0018	KRTAP10-11	21q22.3	protein_coding	0.145135	0	0.231463	0.0838909	1.30032	1.62925
Up	ENSG00000185201	1.34962	0.0026	IFITM2	11p15.5	protein_coding	3.36427	3.71628	3.74963	3.77518	5.02359	4.97833
Up	ENSG00000111669	1.34957	0.00127	TPI1	12p13.31	protein_coding	5.06907	4.83681	5.11147	5.04299	6.45013	6.27919
Up	ENSG00000166598	1.34886	0.00893	HSP90B1	12q23.3	protein_coding	4.5398	4.66558	5.15088	5.10738	6.20662	6.22293
Up	ENSG00000173559	1.34838	0.0401	NABP1	2q32.3	protein_coding	1.4244	1.47816	2.30153	2.3928	3.23775	3.25744
Up	ENSG00000110848	1.34651	0.00615	CD69	12p13.31	protein_coding	0.203432	0.314723	0.697018	0.734021	1.80528	1.86234
Up	ENSG00000101160	1.34619	0.0774	CTSZ	20q13.32	protein_coding	3.09068	2.92685	4.21224	4.05958	4.95407	4.88298
Up	ENSG00000185674	1.34498	0.0126	LYG2	2q11.2	protein_coding	0	0.17383	0.607459	0.579501	1.47338	1.89697
Up	ENSG00000064666	1.34408	0.000685	CNN2	19p13.3	protein_coding	3.57202	3.49444	3.43623	3.35517	4.76798	4.84911
Up	ENSG00000215455	1.34076	0.000305	KRTAP10-1	21q22.3	protein_coding	0.0927878	0	0.12109	0.05327	1.38786	1.42723
Up	ENSG00000119632	1.33911	0.0234	IFI27L2	14q32.12	protein_coding	3.16763	2.985	2.71782	2.19037	4.17013	4.03851
Up	ENSG00000162739	1.33896	0.00388	SLAMF6	1q23.3	protein_coding	0.174006	0.13623	0.48842	0.585006	1.67349	1.69626
Up	ENSG00000205445	1.33891	0.0013	KRTAP10-2	21q22.3	protein_coding	0.246812	0.0705964	0.113599	0.0981669	1.61538	1.32704
Up	ENSG00000167600	1.33745	0.00096	CYP2S1	19q13.2	protein_coding	0.847123	0.872836	0.664279	0.937655	2.17687	2.15897
Up	ENSG00000148834	1.33705	0.00198	GSTO1	10q25.1	protein_coding	2.534	2.16061	2.33919	2.19035	3.65045	3.63572
Up	LOC541471	1.33691	0.0051	NA	NANA	NA	0.866375	1.19922	1.34531	1.33313	2.65938	2.38646
Up	ENSG00000130755	1.33462	0.0328	GMFG	19q13.2	protein_coding	1.22183	1.11652	1.83912	2.09731	2.98272	2.8239
Up	ENSG00000184254	1.33228	0.000763	ALDH1A3	15q26.3	protein_coding	1.0064	0.921944	1.16391	0.986753	2.35668	2.34738
Up	ENSG00000134825	1.33204	0.00973	TMEM258	11q12.2	protein_coding	2.53305	2.86388	3.00073	3.20329	4.40098	4.06357
Up	ENSG00000175567	1.33058	0.0711	UCP2	11q13.4	protein_coding	1.49291	1.38735	2.5334	2.44082	3.50059	3.08782
Up	ENSG00000106803	1.32924	0.00411	SEC61B	9q22.33	protein_coding	3.21132	3.27438	3.48401	3.7111	4.71909	4.7798
Up	ENSG00000196549	1.32862	0.0231	MME	3q25.2	protein_coding	0.184434	0.290059	1.03654	0.878564	1.94317	1.90886
Up	ENSG00000221926	1.32691	0.00143	TRIM16	17p12	protein_coding	2.27842	2.08613	1.98488	1.96304	3.43179	3.37828
Up	ENSG00000147689	1.32534	0.017	FAM83A	8q24.13	protein_coding	1.65459	1.56718	1.2426	0.81746	2.61225	2.67933
Up	ENSG00000213741	1.32495	0.00183	RPS29	14q21.3	protein_coding	6.07877	6.03492	6.34075	6.31622	7.46423	7.571
Up	ENSG00000163751	1.32488	0.0167	CPA3	3q24	protein_coding	0.680431	0.862739	1.40929	1.37651	2.29498	2.51926
Up	ENSG00000188293	1.32474	0.00405	IGFL1	19q13.32	protein_coding	0.543889	0	0.313016	0.333094	1.6497	1.59478
Up	ENSG00000165030	1.32308	0.0139	NFIL3	9q22.31	protein_coding	1.40416	1.35918	1.92847	2.04564	2.9947	3.02019
Up	ENSG00000137563	1.32123	0.0201	GGH	8q12.3	protein_coding	0.717723	1.00247	1.58681	1.44619	2.48449	2.53456
Up	ENSG00000078589	1.31942	0.00684	P2RY10	Xq21.1	protein_coding	0.0563992	0.295125	0.335408	0.693242	1.7574	1.57153
Up	ENSG00000079435	1.31789	0.00067	LIPE	19q13.2	protein_coding	0.398856	0.441764	0.574918	0.535346	1.74959	1.86162
Up	ENSG00000009790	1.31631	0.0157	TRAF3IP3	1q32.2	protein_coding	0.287789	0.551968	0.982969	1.05338	1.96343	2.10724
Up	ENSG00000189334	1.316	0.00096	S100A14	1q21.3	protein_coding	5.06215	4.93955	5.09427	5.21839	6.40299	6.38619
Up	SQRDL	1.31535	0.00507	NA	NANA	NA	2.54705	2.37197	2.86938	2.84023	4.0337	3.91132
Up	ENSG00000011422	1.31497	0.00127	PLAUR	19q13.31	protein_coding	0.704883	1.02135	0.876158	0.781726	2.17069	2.15131
Up	ENSG00000075884	1.31457	0.0358	ARHGAP15	2q22.2	protein_coding	0.924665	0.901071	1.65315	1.79783	2.77314	2.49437
Up	ENSG00000138074	1.31293	0.00295	SLC5A6	2p23.3	protein_coding	1.51823	1.6194	1.1846	1.32304	2.75819	2.6903
Up	ENSG00000102575	1.31249	0.000514	ACP5	19p13.2	protein_coding	1.90504	1.83151	1.81513	1.97765	3.20054	3.1891
Up	ENSG00000277224	1.3122	0.0203	HIST1H2BF	6p22.2	protein_coding	2.6473	2.71343	3.27932	3.35663	4.49586	4.12687
Up	ENSG00000138449	1.31151	0.0599	SLC40A1	2q32.2	protein_coding	1.6178	1.74351	2.74185	2.62121	3.48375	3.50145
Up	ENSG00000160213	1.31079	0.0651	CSTB	21q22.3	protein_coding	3.19602	3.55187	4.25618	4.47513	5.11094	5.25024
Up	ENSG00000101336	1.31046	0.00301	HCK	20q11.21	protein_coding	1.57053	1.40795	1.81687	1.70836	3.04513	2.82764
Up	ENSG00000176340	1.31029	0.00369	COX8A	11q13.1	protein_coding	4.66477	4.50308	4.16939	4.45035	5.83281	5.68156
Up	ENSG00000171522	1.30904	0.00278	PTGER4	5p13.1	protein_coding	1.02371	1.28189	1.41514	1.44316	2.60208	2.59794
Up	ENSG00000107551	1.30708	0.0273	RASSF4	10q11.21	protein_coding	1.59905	1.49106	2.31378	2.29248	3.26731	3.19503
Up	ENSG00000103196	1.3069	0.00121	CRISPLD2	16q24.1	protein_coding	1.94149	1.96452	2.15409	2.19918	3.37517	3.36827
Up	ENSG00000213809	1.30399	0.099	KLRK1	12p13.2	protein_coding	0.562378	0.664252	1.93182	1.70101	2.49778	2.53992
Up	ENSG00000108960	1.30375	0.00096	MMD	17q22	protein_coding	0.765336	1.03744	0.938441	0.919985	2.21632	2.22179
Up	ENSG00000157514	1.302	0.0241	TSC22D3	Xq22.3	protein_coding	3.66283	3.61717	2.83344	3.032	4.51347	4.66326
Up	ENSG00000081041	1.30193	0.00067	CXCL2	4q13.3	protein_coding	0.149375	0.121564	0.099992	0.282168	1.41383	1.51657
Up	ENSG00000178726	1.3011	0.00347	THBD	20p11.21	protein_coding	3.12026	2.8591	2.65279	2.71772	4.12171	4.15543
Up	ENSG00000134460	1.29983	0.0013	IL2RA	10p15.1	protein_coding	0.0798409	0.0218275	0.246356	0.305128	1.49074	1.4355
Up	ENSG00000155380	1.29615	0.0041	SLC16A1	1p13.2	protein_coding	1.48501	1.8564	1.37994	1.59803	2.97889	2.7731
Up	ENSG00000172382	1.29558	0.00636	PRSS27	16p13.3	protein_coding	0.651885	0.51055	0.119805	0.168917	1.6197	1.69704
Up	ENSG00000132341	1.29507	0.000514	RAN	12q24.33	protein_coding	4.69017	4.71016	4.55134	4.63223	5.96672	5.91536
Up	ENSG00000007908	1.29491	0.00143	SELE	1q24.2	protein_coding	0.807542	0.669281	0.933559	0.984793	2.14711	2.1403
Up	ENSG00000123416	1.29445	0.0018	TUBA1B	12q13.12	protein_coding	5.34587	5.42103	5.65614	5.62944	6.85781	6.75733
Up	ENSG00000160791	1.29435	0.0242	CCR5	3p21.31	protein_coding	0.261782	0.245541	0.930871	1.01593	1.9666	1.84916
Up	ENSG00000205542	1.29433	0.00798	TMSB4X	Xp22.2	protein_coding	7.30071	7.1454	7.65451	7.72451	8.68208	8.81916
Up	ENSG00000105835	1.29258	0.0118	NAMPT	7q22.3	protein_coding	2.58114	2.80539	3.22502	3.23938	4.28896	4.22166
Up	ENSG00000135373	1.29238	0.00777	EHF	11p13	protein_coding	3.24537	3.36103	3.75456	3.79906	4.87451	4.79027
Up	ENSG00000151239	1.29233	0.00697	TWF1	12q12	protein_coding	2.55217	2.64442	2.99736	3.10879	4.12852	4.1075
Up	ENSG00000136810	1.29165	0.00572	TXN	9q31.3	protein_coding	4.3971	4.48853	4.79465	4.92767	5.94642	5.94087
Up	ENSG00000172543	1.29061	0.0326	CTSW	11q13.1	protein_coding	0.586833	0.822385	1.49317	1.46479	2.46192	2.30289
Up	ENSG00000147138	1.28908	0.0221	GPR174	Xq21.1	protein_coding	0.0729774	0.115847	0.529646	0.933471	1.745	1.65913
Up	ENSG00000121900	1.28752	0.00167	TMEM54	1p35.1	protein_coding	2.43507	2.69389	2.35401	2.56449	3.82476	3.77402
Up	ENSG00000172183	1.28719	0.0385	ISG20	15q26.1	protein_coding	0.711636	0.979562	1.73818	1.58808	2.55711	2.526
Up	SEPP1	1.28701	0.0331	NA	NANA	NA	3.87629	4.0761	4.6557	4.84882	5.6971	5.60537
Up	ENSG00000148773	1.2864	0.00146	MKI67	10q26.2	protein_coding	1.584	1.69957	1.85841	1.87913	3.07558	3.00777
Up	ENSG00000215454	1.28621	0.00104	KRTAP10-4	21q22.3	protein_coding	0	0.0792611	0.225221	0.145012	1.31289	1.48429
Up	ENSG00000125910	1.28527	0.0018	S1PR4	19p13.3	protein_coding	0.0565161	0	0.305735	0.239586	1.36228	1.50918
Up	ENSG00000205571	1.2851	0.0414	SMN2	5q13.2	protein_coding	1.0445	0.497764	1.1499	1.71788	2.40193	2.37329
Up	ENSG00000083457	1.28339	0.000599	ITGAE	17p13.2	protein_coding	0.461027	0.32438	0.329496	0.277957	1.66715	1.59606
Up	ENSG00000260314	1.28284	0.0331	MRC1	10p12.33	protein_coding	0.595418	0.810633	1.47782	1.49767	2.3583	2.39815
Up	ENSG00000145779	1.28055	0.0191	TNFAIP8	5q23.1	protein_coding	2.04232	1.83989	2.51251	2.63021	3.61244	3.46112
Up	ENSG00000108759	1.28048	0.0121	KRT32	17q21.2	protein_coding	1.7933	1.50245	1.29464	1.02886	2.71718	2.65342
Up	ENSG00000124762	1.28012	0.00217	CDKN1A	6p21.2	protein_coding	3.66154	3.37852	3.28716	3.33718	4.7272	4.66525
Up	ENSG00000197540	1.27966	0.00256	GZMM	19p13.3	protein_coding	0	0	0.0672476	0.363035	1.32453	1.44994
Up	ENSG00000134851	1.27869	0.000933	TMEM165	4q12	protein_coding	2.68765	2.67231	2.81106	2.84096	3.95265	4.11072
Up	ENSG00000134871	1.27862	0.0922	COL4A2	13q34	protein_coding	2.50504	2.14117	3.50448	3.39927	4.14412	4.18811
Up	ENSG00000143387	1.2768	0.00096	CTSK	1q21.3	protein_coding	3.27425	3.18621	3.41823	3.38801	4.62298	4.56396
Up	ENSG00000134516	1.27665	0.0931	DOCK2	5q35.1	protein_coding	0.957343	0.942496	2.06359	2.15835	2.82101	2.79319
Up	ENSG00000197043	1.2766	0.0653	ANXA6	5q33.1	protein_coding	2.48057	2.34326	3.4718	3.36287	4.219	4.16345
Up	ENSG00000164932	1.27537	0.0115	CTHRC1	8q22.3	protein_coding	0.594373	1.04819	1.31378	1.14027	2.40446	2.19459
Up	ENSG00000077238	1.27339	0.00143	IL4R	16p12.1	protein_coding	2.63208	2.48598	2.38329	2.33728	3.67538	3.79072
Up	ENSG00000163221	1.27108	0.000217	S100A12	1q21.3	protein_coding	0	0	0	0	1.2351	1.30707
Up	ENSG00000180730	1.27102	0.0699	SHISA2	13q12.13	protein_coding	0.378136	0.367285	1.41508	1.37454	2.26937	2.04019
Up	ENSG00000241123	1.27005	0.00339	KRTAP10-5	21q22.3	protein_coding	0	0.163345	0.425458	0.324748	1.58755	1.40933
Up	ENSG00000154589	1.26954	0.0925	LY96	8q21.11	protein_coding	0	0.370887	1.22656	1.36566	1.91497	2.10566
Up	ENSG00000102970	1.26809	0.0176	CCL17	16q21	protein_coding	0	0	0.566438	0.693375	1.57505	1.59103
Up	ENSG00000163687	1.26785	0.0123	DNASE1L3	3p14.3	protein_coding	1.3486	0.931515	1.64093	1.03604	2.45178	2.56247
Up	ENSG00000077152	1.26746	0.00541	UBE2T	1q32.1	protein_coding	0.679668	0.684504	0.882697	0.468384	1.73583	2.15672
Up	ENSG00000138180	1.26731	0.00525	CEP55	10q23.33	protein_coding	0.57541	0.609194	0.970404	0.828692	2.19367	1.83279
Up	TUSC5	1.26554	0.00169	NA	NANA	NA	0.0713005	0	0.248343	0.228425	1.51318	1.29194
Up	ENSG00000139193	1.26476	0.018	CD27	12p13.31	protein_coding	0.478671	0.521873	0.828586	0.980814	1.62572	2.30876
Up	ENSG00000185215	1.26328	0.0245	TNFAIP2	14q32.32	protein_coding	2.74758	2.64239	3.47602	3.30388	4.34547	4.26603
Up	ENSG00000176014	1.26244	0.00898	TUBB6	18p11.21	protein_coding	4.14065	3.87464	3.5608	3.52852	5.05077	5.02641
Up	ENSG00000116741	1.2608	0.00379	RGS2	1q31.2	protein_coding	2.02513	2.3384	1.86733	2.22114	3.38115	3.36644
Up	ENSG00000123338	1.25993	0.0399	NCKAP1L	12q13.13	protein_coding	1.45532	1.4659	2.33333	2.25534	3.17999	3.09481
Up	ENSG00000171848	1.25939	0.00186	RRM2	2p25.1	protein_coding	1.56007	1.248	1.50688	1.28653	2.66125	2.65826
Up	ENSG00000161960	1.25893	0.00167	EIF4A1	17p13.1	protein_coding	5.30245	5.30255	5.03191	5.0747	6.47476	6.3989
Up	ENSG00000127954	1.25883	0.00632	STEAP4	7q21.12	protein_coding	1.57375	1.50629	1.99866	1.94609	2.99258	3.03746
Up	ENSG00000167797	1.25855	0.00255	CDK2AP2	11q13.2	protein_coding	1.23871	1.37845	1.37217	1.61389	2.5571	2.76162
Up	ENSG00000181061	1.25762	0.0141	HIGD1A	3p22.1	protein_coding	2.21336	2.35409	2.83634	2.88104	3.84206	3.81559
Up	ENSG00000142347	1.25651	0.0397	MYO1F	19p13.2	protein_coding	0.879478	0.753875	1.6508	1.62824	2.41194	2.55727
Up	ENSG00000147065	1.2557	0.00207	MSN	Xq12	protein_coding	4.47665	4.59608	4.82632	4.77104	5.95507	5.89137
Up	ENSG00000217555	1.25512	0.00179	CKLF	16q21	protein_coding	1.47302	1.2468	1.50621	1.21033	2.63366	2.59476
Up	ENSG00000069535	1.25461	0.00528	MAOB	Xp11.3	protein_coding	1.1447	0.923961	1.43866	1.33055	2.37912	2.54903
Up	ENSG00000120049	1.25355	0.00096	KCNIP2	10q24.32	protein_coding	0.731765	0.804287	0.730026	0.55847	1.9968	1.92259
Up	ENSG00000167703	1.2535	0.00913	SLC43A2	17p13.3	protein_coding	0.742254	0.741497	1.27979	1.17277	2.17009	2.30507
Up	FAM96B	1.2533	0.00284	NA	NANA	NA	2.42438	2.34474	2.0516	2.16508	3.41188	3.58763
Up	ENSG00000213402	1.25302	0.00195	PTPRCAP	11q13.2	protein_coding	2.27537	1.90138	2.0977	2.07055	3.29172	3.38682
Up	ENSG00000137491	1.25204	0.00163	SLCO2B1	11q13.4	protein_coding	1.33775	1.36355	1.53966	1.5689	2.60488	2.80413
Up	ENSG00000065911	1.25151	0.00469	MTHFD2	2p13.1	protein_coding	1.25959	1.47343	1.71975	1.72479	2.76384	2.82796
Up	ENSG00000242616	1.25014	0.00309	GNG10	9q31.3	protein_coding	1.962	2.31784	2.31116	2.36987	3.53212	3.4486
Up	ENSG00000134308	1.2497	0.0242	YWHAQ	2p25.1	protein_coding	3.75238	3.89694	4.44511	4.57614	5.44422	5.39046
Up	ENSG00000115009	1.24789	0.000544	CCL20	2q36.3	protein_coding	0.113957	0	0.148717	0.128528	1.38565	1.30574
Up	ENSG00000132205	1.24533	0.0605	EMILIN2	18p11.32	protein_coding	1.02942	0.877047	1.9532	1.85705	2.6643	2.68471
Up	ENSG00000060558	1.245	0.00843	GNA15	19p13.3	protein_coding	2.64674	2.42601	2.07048	2.09411	3.57511	3.53358
Up	ENSG00000141480	1.24435	0.0263	ARRB2	17p13.2	protein_coding	1.28191	1.32217	2.04751	1.98601	2.87288	2.93462
Up	ENSG00000075624	1.24315	0.0107	ACTB	7p22.1	protein_coding	8.02082	7.91892	8.48575	8.48916	9.47691	9.46672
Up	ENSG00000111885	1.24315	0.00326	MAN1A1	6q22.31	protein_coding	2.29532	2.25509	1.91923	1.98074	3.39808	3.3134
Up	ENSG00000277157	1.24124	0.0344	HIST1H4D	6p22.2	protein_coding	5.30366	5.24508	4.55731	4.44544	6.19368	6.06455
Up	ENSG00000115091	1.24059	0.000515	ACTR3	2q14.1	protein_coding	3.85002	3.97174	3.96688	4.01149	5.18595	5.1953
Up	ENSG00000091317	1.23984	0.0246	CMTM6	3p22.3	protein_coding	2.48863	2.55335	3.14533	3.27922	4.0909	4.12204
Up	ENSG00000177272	1.23935	0.00212	KCNA3	1p13.3	protein_coding	0.388916	0.286189	0.60793	0.607769	1.72349	1.7006
Up	ENSG00000113368	1.23834	0.00234	LMNB1	5q23.2	protein_coding	1.95337	1.71649	2.10205	2.02537	3.21374	3.16157
Up	ENSG00000121807	1.23688	0.012	CCR2	3p21.31	protein_coding	0.67214	0.414834	1.03629	1.06956	2.04846	2.02172
Up	ENSG00000244094	1.23631	0.0041	SPRR2F	1q21.3	protein_coding	0.45504	0.182762	0.0350594	0.0226094	1.4846	1.33576
Up	ENSG00000132386	1.23597	0.00152	SERPINF1	17p13.3	protein_coding	3.53036	3.51247	3.79725	3.6982	4.84966	4.89141
Up	ENSG00000085514	1.23245	0.00598	PILRA	7q22.1	protein_coding	0.917098	0.800663	1.22689	1.26216	2.18512	2.38318
Up	ENSG00000197646	1.23214	0.0114	PDCD1LG2	9p24.1	protein_coding	0.49499	0.432656	1.02791	0.933638	2.02066	1.88822
Up	ENSG00000104368	1.23152	0.00143	PLAT	8p11.21	protein_coding	1.23049	1.25788	1.0758	0.991329	2.32342	2.41736
Up	ENSG00000197061	1.22713	0.0142	HIST1H4C	6p22.2	protein_coding	5.16471	5.03435	4.53335	5.28456	6.23871	6.22403
Up	ENSG00000149428	1.22673	0.00096	HYOU1	11q23.3	protein_coding	2.71065	2.55829	2.75646	2.56449	3.9069	3.84151
Up	ENSG00000173083	1.22672	0.000424	HPSE	4q21.23	protein_coding	0.627673	0.648827	0.519153	0.634743	1.82845	1.84019
Up	ENSG00000130508	1.22658	0.00359	PXDN	2p25.3	protein_coding	1.1192	0.930813	1.38529	1.26091	2.36308	2.4382
Up	ENSG00000115221	1.22384	0.00318	ITGB6	2q24.2	protein_coding	1.005	0.92051	1.30545	1.2452	2.38324	2.30252
Up	ENSG00000118785	1.22274	0.00117	SPP1	4q22.1	protein_coding	0.164569	0.0906575	0.0366038	0.155546	1.45801	1.21116
Up	ENSG00000142627	1.22199	0.0132	EPHA2	1p36.13	protein_coding	2.86289	2.76345	2.26751	2.26022	3.75383	3.76718
Up	ENSG00000090339	1.22135	0.0626	ICAM1	19p13.2	protein_coding	1.72773	1.42812	2.49122	2.52356	3.24134	3.28668
Up	ENSG00000132002	1.22047	0.00257	DNAJB1	19p13.12	protein_coding	3.7575	3.44251	3.46357	3.39152	4.67386	4.79463
Up	ENSG00000228474	1.22026	0.00612	OST4	2p23.3	protein_coding	4.15462	4.29393	4.60648	4.65197	5.62843	5.66558
Up	ENSG00000136689	1.21772	0.00891	IL1RN	2q14.1	protein_coding	3.49271	3.61602	3.14686	3.05127	4.46884	4.62004
Up	ENSG00000174502	1.21675	0.00213	SLC26A9	1q32.1	protein_coding	0.489582	0.587696	0.423446	0.217588	1.61102	1.68164
Up	ENSG00000158406	1.21439	0.00865	HIST1H4H	6p22.2	protein_coding	4.82407	5.40372	4.89151	4.90545	6.28902	6.15213
Up	ENSG00000155629	1.21426	0.0494	PIK3AP1	10q24.1	protein_coding	0.336393	0.288067	1.11173	1.21368	1.83408	2.06938
Up	ENSG00000169258	1.21241	0.00119	GPRIN1	5q35.2	protein_coding	0.442372	0.326211	0.19007	0.206499	1.5061	1.5013
Up	ENSG00000121594	1.21228	0.00422	CD80	3q13.33	protein_coding	0.236643	0.215634	0.636363	0.51368	1.58884	1.63687
Up	ENSG00000222036	1.21219	0.000583	POTEM	14q11.2	protein_coding	0.107843	0.157151	0.0153981	0.0145027	1.25511	1.31673
Up	ENSG00000167397	1.21188	0.00348	VKORC1	16p11.2	protein_coding	2.54616	2.82209	2.38037	2.52585	3.71103	3.84997
Up	ENSG00000233276	1.21132	0.000642	GPX1	3p21.31	polymorphic_pseudogene	3.38235	3.46858	3.32651	3.4342	4.6776	4.55086
Up	ENSG00000278677	1.20885	0.00744	HIST1H2AM	6p22.1	protein_coding	3.45901	3.62282	3.81123	4.01178	5.05185	4.81827
Up	ENSG00000049323	1.20597	0.0459	LTBP1	2p22.3	protein_coding	1.65204	1.45051	2.43045	2.32284	3.12788	3.21199
Up	ENSG00000100567	1.20509	0.0157	PSMA3	14q23.1	protein_coding	2.96528	3.00292	3.56317	3.55664	4.53251	4.42167
Up	ENSG00000084207	1.20319	0.00376	GSTP1	11q13.2	protein_coding	5.74188	5.58987	5.46314	5.29245	6.7884	6.66165
Up	ENSG00000180817	1.20277	0.0598	PPA1	10q22.1	protein_coding	3.30581	3.46171	4.31309	4.28753	5.03663	5.05299
Up	ENSG00000143196	1.20159	0.0198	DPT	1q24.2	protein_coding	2.75497	2.60173	2.0015	2.16261	3.50651	3.65708
Up	ENSG00000145050	1.20061	0.00171	MANF	3p21.2	protein_coding	2.63424	2.36309	2.62133	2.65215	3.71934	3.8173
Up	ENSG00000125430	1.19951	0.000514	HS3ST3B1	17p12	protein_coding	0.498108	0.580254	0.425436	0.494167	1.71476	1.68325
Up	ENSG00000116285	1.19919	0.00138	ERRFI1	1p36.23	protein_coding	1.82263	1.75895	1.89075	2.05339	3.07275	3.08848
Up	ENSG00000177556	1.19905	0.00169	ATOX1	5q33.1	protein_coding	3.24403	3.00324	3.0717	2.94244	4.19651	4.33229
Up	ENSG00000100387	1.19903	0.00109	RBX1	22q13.2	protein_coding	2.13543	2.21795	2.27261	2.38683	3.4947	3.40978
Up	ENSG00000196787	1.19826	0.00329	HIST1H2AG	6p22.1	protein_coding	4.2453	4.18393	4.54908	4.37482	5.65049	5.42259
Up	PCNA-AS1	1.19617	0.0625	NA	NANA	NA	2.54494	3.32578	2.28879	2.10282	3.79936	3.72415
Up	ENSG00000117399	1.19588	0.000803	CDC20	1p34.2	protein_coding	1.19463	1.35393	1.22862	1.16515	2.47802	2.3849
Up	ENSG00000187498	1.19375	0.0295	COL4A1	13q34	protein_coding	2.64976	2.39885	3.21446	3.21856	4.05845	4.06987
Up	ENSG00000148344	1.19359	0.0146	PTGES	9q34.11	protein_coding	2.20255	2.27423	1.61467	1.79699	3.23902	3.09237
Up	ENSG00000278588	1.19265	0.0084	HIST1H2BI	6p22.2	protein_coding	3.56823	3.27628	3.61526	3.92064	4.75341	4.8221
Up	ENSG00000015285	1.19185	0.0125	WAS	Xp11.23	protein_coding	0.895871	0.828408	1.38044	1.3973	2.31409	2.32063
Up	ENSG00000274267	1.19169	0.00808	HIST1H3B	6p22.2	protein_coding	4.80881	4.55647	4.38682	4.23652	5.79891	5.5788
Up	ENSG00000244482	1.19169	0.00615	LILRA6	19q13.42	protein_coding	0.169848	0.0654543	0.519317	0.498643	1.43763	1.57239
Up	ENSG00000127184	1.19097	0.00947	COX7C	5q14.3	protein_coding	5.094	4.98428	5.32536	5.59478	6.51288	6.36828
Up	ENSG00000149781	1.19057	0.0233	FERMT3	11q13.1	protein_coding	1.17819	0.784511	1.54734	1.59912	2.42869	2.50702
Up	ENSG00000038427	1.18791	0.0376	VCAN	5q14.2	protein_coding	2.14295	2.18641	2.92815	2.94613	3.74988	3.72777
Up	ENSG00000122188	1.18711	0.00157	LAX1	1q32.1	protein_coding	0.200065	0.148412	0.303664	0.445807	1.48794	1.43525
Up	ENSG00000278637	1.18665	0.00789	HIST1H4A	6p22.2	protein_coding	2.76561	2.87209	2.63917	2.32626	3.71151	3.96336
Up	ENSG00000172757	1.1864	0.0013	CFL1	11q13.1	protein_coding	5.77886	5.54382	5.799	5.78275	6.90682	6.91821
Up	FAM198B	1.18442	0.0671	NA	NANA	NA	1.3259	1.48266	2.3226	2.36959	3.04525	3.07398
Up	ENSG00000164611	1.18343	0.00201	PTTG1	5q33.3	protein_coding	2.32821	2.19461	2.3013	2.20004	3.6029	3.27604
Up	ENSG00000132963	1.18333	0.00121	POMP	13q12.3	protein_coding	2.24419	2.02879	2.16833	2.1476	3.42268	3.23842
Up	ENSG00000110031	1.18245	0.0205	LPXN	11q12.1	protein_coding	1.14057	1.06881	1.65314	1.78518	2.56786	2.62089
Up	ENSG00000109625	1.18203	0.00209	CPZ	4p16.1	protein_coding	0.997638	0.878829	0.787222	0.781653	1.90386	2.18287
Up	ENSG00000254838	1.18175	0.042	GVINP1	11p15.4	transcribed_unprocessed_pseudogene	0.218289	0.285253	1.08448	1.01239	1.82518	1.83853
Up	ENSG00000123329	1.18147	0.022	ARHGAP9	12q13.3	protein_coding	0.756231	0.830525	1.36447	1.485	2.31944	2.2616
Up	ENSG00000184924	1.18118	0.00144	PTRHD1	2p23.3	protein_coding	2.27471	2.46129	2.50303	2.5592	3.59194	3.66954
Up	ENSG00000173918	1.18076	0.000514	C1QTNF1	17q25.3	protein_coding	1.45403	1.56142	1.51428	1.43353	2.64127	2.70189
Up	ENSG00000276368	1.18033	0.0143	HIST1H2AJ	6p22.1	protein_coding	3.90783	3.99557	4.57572	4.28411	5.48812	5.25416
Up	ENSG00000106560	1.18014	0.00257	GIMAP2	7q36.1	protein_coding	1.05007	1.20865	1.36877	1.35828	2.51459	2.33857
Up	ENSG00000166794	1.18013	0.0142	PPIB	15q22.31	protein_coding	4.76548	4.55334	5.23214	5.13014	6.12388	6.07694
Up	ENSG00000172716	1.1795	0.0324	SLFN11	17q12	protein_coding	0.668175	0.754744	1.41459	1.45939	2.24147	2.26599
Up	ENSG00000100365	1.17915	0.0105	NCF4	22q12.3	protein_coding	0.797858	0.955403	1.34126	1.28669	2.40992	2.13899
Up	ENSG00000133800	1.17869	0.00257	LYVE1	11p15.4	protein_coding	0.799839	0.936207	0.601861	0.600245	1.8847	1.94175
Up	ENSG00000176597	1.17759	0.00363	B3GNT5	3q27.1	protein_coding	1.59596	1.44965	1.83965	1.82688	2.83497	2.87627
Up	ENSG00000072110	1.1775	0.0542	ACTN1	14q24.1	protein_coding	3.51569	3.26906	4.26632	4.22494	4.97929	5.0137
Up	ENSG00000152270	1.17739	0.00121	PDE3B	11p15.2	protein_coding	0.467829	0.511943	0.628209	0.711153	1.71414	1.8002
Up	ENSG00000183696	1.17524	0.00123	UPP1	7p12.3	protein_coding	0.582566	0.514972	0.785604	0.662056	1.80211	1.82098
Up	ENSG00000163823	1.17461	0.00753	CCR1	3p21.31	protein_coding	0.126919	0.15173	0.567322	0.578439	1.51889	1.54253
Up	ENSG00000084070	1.17338	0.00083	SMAP2	1p34.2	protein_coding	2.24168	2.11226	2.27007	2.10013	3.38094	3.32789
Up	ENSG00000204572	1.17312	0.00114	KRTAP5-10	11q13.4	protein_coding	0.171373	0	0.087207	0	1.14794	1.32759
Up	ENSG00000203814	1.17213	0.00248	HIST2H2BF	1q21.2	protein_coding	4.59014	4.93429	4.71861	4.82695	6.02024	5.85902
Up	ENSG00000149257	1.1715	0.0102	SERPINH1	11q13.5	protein_coding	3.29502	3.04827	2.71051	2.75467	4.19236	4.05487
Up	ENSG00000159200	1.17091	0.000685	RCAN1	21q22.12	protein_coding	2.21347	2.28974	2.12577	2.21004	3.32486	3.43647
Up	ENSG00000103490	1.17072	0.0108	PYCARD	16p11.2	protein_coding	3.5196	3.20988	3.26776	2.83642	4.4252	4.33306
Up	ENSG00000151715	1.1703	0.00638	TMEM45B	11q24.3	protein_coding	1.17078	1.2688	1.53809	1.67765	2.56455	2.60371
Up	ENSG00000131236	1.16833	0.0239	CAP1	1p34.2	protein_coding	3.81962	3.95968	4.54976	4.50916	5.42231	5.33345
Up	ENSG00000242125	1.16724	0.00096	SNHG3	1p35.3	processed_transcript	2.30407	2.35797	2.27393	2.14046	3.47902	3.39366
Up	ENSG00000104093	1.16715	0.0115	DMXL2	15q21.2	protein_coding	1.11675	1.07033	1.59287	1.59667	2.52554	2.49707
Up	ENSG00000205755	1.16689	0.00166	CRLF2	Xp22.33	protein_coding	0	0.232706	0.0847169	0.271961	1.26335	1.36512
Up	ENSG00000105677	1.16528	0.0136	TMEM147	19q13.12	protein_coding	2.73075	3.08275	2.4095	2.46804	3.86373	3.81235
Up	ENSG00000172575	1.16508	0.00422	RASGRP1	15q14	protein_coding	1.51272	1.58844	1.9108	1.87048	2.90205	2.86933
Up	ENSG00000161921	1.16409	0.0194	CXCL16	17p13.2	protein_coding	2.06895	1.85493	2.53673	2.55121	3.42831	3.40577
Up	ENSG00000143851	1.16401	0.00542	PTPN7	1q32.1	protein_coding	0.360541	0.44618	0.615564	0.860929	1.72871	1.74091
Up	ENSG00000136960	1.16339	0.000849	ENPP2	8q24.12	protein_coding	2.52016	2.4894	2.32892	2.50701	3.63664	3.6129
Up	ENSG00000111640	1.16264	0.00212	GAPDH	12p13.31	protein_coding	7.33778	7.20081	7.51449	7.5029	8.58036	8.52291
Up	ENSG00000089692	1.16228	0.00412	LAG3	12p13.31	protein_coding	0.17087	0.171774	0.518858	0.475774	1.42711	1.56609
Up	ENSG00000198856	1.16212	0.00301	OSTC	4q25	protein_coding	2.28189	2.60941	2.59535	2.66625	3.69819	3.7025
Up	ENSG00000146072	1.16204	0.0227	TNFRSF21	6p12.3	protein_coding	0.808764	0.740884	1.44724	1.36422	2.27877	2.22585
Up	CCDC109B	1.16124	0.0309	NA	NANA	NA	1.63113	1.49243	2.30332	2.18886	2.98501	3.14534
Up	ENSG00000198818	1.16079	0.00201	SFT2D1	6q27	protein_coding	1.72197	1.82207	1.99194	1.98766	3.12056	2.96285
Up	ENSG00000154978	1.1604	0.0552	VOPP1	7p11.2	protein_coding	1.93691	1.44478	2.52075	2.39892	3.11735	3.35414
Up	TARP	1.15972	0.0975	NA	NANA	NA	0.257895	0.336981	1.13994	1.52805	1.97821	1.97267
Up	ENSG00000204264	1.15968	0.0294	PSMB8	6p21.32	protein_coding	3.3694	3.36702	4.09947	4.01811	4.88172	4.86464
Up	ENSG00000249693	1.15926	0.00198	THEGL	4q12	protein_coding	0.336684	0.234357	0.119459	0.136287	1.2371	1.4948
Up	ENSG00000129128	1.15797	0.00886	SPCS3	4q34.2	protein_coding	2.61308	2.60795	2.96681	3.13344	3.98637	3.9902
Up	ENSG00000006327	1.15707	0.0151	TNFRSF12A	16p13.3	protein_coding	2.06324	1.79055	1.50499	1.34645	2.85141	2.81535
Up	ENSG00000172116	1.15601	0.0121	CD8B	2p11.2	protein_coding	0.336899	0.239843	0.76358	0.806883	1.65281	1.73282
Up	ENSG00000084733	1.155	0.00201	RAB10	2p23.3	protein_coding	3.45221	3.79778	3.59759	3.68754	4.79143	4.78612
Up	ENSG00000175768	1.15485	0.000734	TOMM5	9p13.2	protein_coding	2.83567	2.7844	2.95189	2.90984	3.98255	4.06805
Up	ENSG00000118257	1.15315	0.0129	NRP2	2q33.3	protein_coding	1.33839	1.06794	1.76143	1.53821	2.52155	2.63774
Up	ENSG00000154175	1.15314	0.0215	ABI3BP	3q12.2	protein_coding	2.25919	2.37286	2.95775	2.89993	3.79576	3.7554
Up	ENSG00000143933	1.15236	0.0241	CALM2	2p21	protein_coding	5.08359	5.24533	5.80771	5.7874	6.64055	6.62619
Up	ENSG00000144118	1.15189	0.0138	RALB	2q14.2	protein_coding	2.11218	2.13086	2.59446	2.69504	3.5082	3.56185
Up	ENSG00000132589	1.15182	0.0054	FLOT2	17q11.2	protein_coding	3.23959	3.0363	2.92372	2.72543	4.09057	4.1756
Up	ENSG00000198223	1.15166	0.0449	CSF2RA	Xp22.33	protein_coding	1.26737	1.05317	1.89834	1.98304	2.71369	2.69059
Up	ENSG00000105122	1.15137	0.00317	RASAL3	19p13.12	protein_coding	0.332648	0.456472	0.672646	0.693172	1.66193	1.71828
Up	ENSG00000066379	1.15014	0.00698	ZNRD1	6p22.1	protein_coding	1.44401	1.9562	1.65279	1.53075	2.69517	2.89699
Up	ENSG00000241553	1.14897	0.0014	ARPC4	3p25.3	protein_coding	3.55908	3.53074	3.33332	3.33881	4.59234	4.58658
Up	ENSG00000155465	1.14749	0.00456	SLC7A7	14q11.2	protein_coding	0.469965	0.502243	0.856468	0.807987	1.83355	1.77977
Up	ENSG00000088325	1.14664	0.000966	TPX2	20q11.21	protein_coding	1.37348	1.2378	1.33226	1.46377	2.52893	2.46799
Up	ENSG00000144136	1.1466	0.00177	SLC20A1	2q14.1	protein_coding	1.70989	1.68555	1.86958	1.97461	2.95708	2.95595
Up	ENSG00000108679	1.14637	0.0257	LGALS3BP	17q25.3	protein_coding	3.4883	3.32756	3.99185	4.0875	4.94895	4.79138
Up	ENSG00000136695	1.14581	0.00163	IL36RN	2q14.1	protein_coding	1.28548	1.40663	1.20168	1.46731	2.4244	2.54778
Up	ENSG00000111328	1.14542	0.0414	CDK2AP1	12q24.31	protein_coding	2.55493	2.91436	3.40611	3.4971	4.31264	4.16446
Up	C8ORF4	1.14301	0.0315	NA	NANA	NA	0.530774	0.498648	1.36215	0.887861	1.99637	1.92937
Up	ENSG00000156261	1.143	0.0022	CCT8	21q21.3	protein_coding	3.36788	3.58485	3.66265	3.69807	4.75182	4.6909
Up	ENSG00000135698	1.14078	0.0056	MPHOSPH6	16q23.3	protein_coding	2.71042	2.93381	2.52664	2.44224	3.80889	3.77923
Up	ENSG00000122224	1.13986	0.00982	LY9	1q23.3	protein_coding	0.250387	0.15182	0.703879	0.588717	1.51197	1.61516
Up	ENSG00000154734	1.13861	0.000665	ADAMTS1	21q21.3	protein_coding	1.72447	1.81867	1.7051	1.64082	2.84736	2.87439
Up	ENSG00000214856	1.13803	0.00291	KRT16P1	17p11.2	transcribed_unprocessed_pseudogene	0.146249	0.231019	0.507198	0.424609	1.47346	1.45714
Up	ENSG00000275903	1.13766	0.000339	PSMB3	CHR_HSCHR17_7_CTG4	protein_coding	3.811	3.74753	3.82323	3.78321	4.95478	4.90302
Up	ENSG00000104518	1.1373	0.00793	GSDMD	8q24.3	protein_coding	1.95265	1.91549	2.42106	2.21093	3.17627	3.34839
Up	ENSG00000155115	1.13632	0.00415	GTF3C6	6q21	protein_coding	2.07438	2.2975	1.88083	1.9524	3.2653	3.1099
Up	ENSG00000134242	1.13625	0.0215	PTPN22	1p13.2	protein_coding	0.361618	0.500279	0.931272	1.09503	1.78535	1.93125
Up	ENSG00000179218	1.13549	0.0313	CALR	19p13.13	protein_coding	5.23305	5.06594	5.88915	5.76104	6.64175	6.60382
Up	HN1	1.13513	0.00546	NA	NANA	NA	2.3389	2.31374	1.94023	1.9782	3.23704	3.31876
Up	ENSG00000114251	1.13362	0.00581	WNT5A	3p14.3	protein_coding	0.650452	0.673887	1.10017	0.946464	1.94871	2.00402
Up	ENSG00000140678	1.13252	0.0301	ITGAX	16p11.2	protein_coding	0.726439	0.615289	1.38835	1.30104	2.15768	2.12293
Up	ENSG00000107372	1.13154	0.00799	ZFAND5	9q21.13	protein_coding	2.25142	2.30591	2.70553	2.69787	3.59025	3.6532
Up	ENSG00000106588	1.13108	0.00315	PSMA2	7p14.1	protein_coding	2.4529	2.74159	2.63605	2.84827	3.84261	3.75895
Up	ENSG00000177889	1.12979	0.00293	UBE2N	12q22	protein_coding	2.13996	2.17539	2.40747	2.4709	3.45489	3.40156
Up	ENSG00000205439	1.12974	0.00748	KRTAP12-3	21q22.3	protein_coding	0.503684	0.422957	0	0.309	1.3238	1.55351
Up	ENSG00000196954	1.1292	0.0132	CASP4	11q22.3	protein_coding	3.1971	3.35603	3.72794	3.79402	4.72125	4.57469
Up	ENSG00000184357	1.12913	0.00651	HIST1H1B	6p22.1	protein_coding	4.75851	4.34644	4.45859	4.23645	5.6265	5.53175
Up	ENSG00000100600	1.12886	0.0219	LGMN	14q32.12	protein_coding	2.35645	2.38597	2.9397	3.01816	3.7975	3.81036
Up	ENSG00000064989	1.12801	0.00129	CALCRL	2q32.1	protein_coding	1.0888	1.29632	1.0474	1.21309	2.28859	2.29023
Up	ENSG00000134954	1.12745	0.00438	ETS1	11q24.3	protein_coding	2.26742	2.46195	2.70078	2.63915	3.62552	3.66404
Up	ENSG00000101443	1.12638	0.00427	WFDC2	20q13.12	protein_coding	0.61993	0.903365	0.532692	0.466413	1.73384	1.78013
Up	ENSG00000174175	1.12638	0.000264	SELP	1q24.2	protein_coding	0.743019	0.775387	0.748711	0.761561	1.85721	1.90988
Up	ENSG00000186407	1.12588	0.00213	CD300E	17q25.1	protein_coding	0.208104	0.0966363	0.358429	0.401742	1.44095	1.34325
Up	ENSG00000105887	1.12575	0.00292	MTPN	7q33	protein_coding	2.78858	3.00067	2.90835	3.17386	4.13308	4.05415
Up	ENSG00000133657	1.12502	0.00547	ATP13A3	3q29	protein_coding	1.83582	2.15958	2.1731	2.34546	3.27732	3.22968
Up	ENSG00000128228	1.12456	0.00231	SDF2L1	22q11.21	protein_coding	1.01618	1.0563	1.32537	1.16871	2.19533	2.33707
Up	ENSG00000177674	1.12348	0.0109	AGTRAP	1p36.22	protein_coding	1.62481	1.91987	2.18307	2.11615	3.2213	2.94761
Up	ENSG00000239672	1.12315	0.00911	NME1	17q21.33	protein_coding	3.03168	2.85569	3.38003	3.28429	4.37714	4.145
Up	ENSG00000146232	1.123	0.00505	NFKBIE	6p21.1	protein_coding	1.28265	0.984957	0.895493	0.811542	2.09263	2.1407
Up	ENSG00000206314	1.12287	0.00359	GPSM3	CHR_HSCHR6_MHC_QBL_CTG1	protein_coding	1.14368	1.17128	1.4492	1.05275	2.39398	2.26021
Up	ENSG00000143507	1.12245	0.00744	DUSP10	1q41	protein_coding	1.11483	1.27894	1.52573	1.6363	2.54407	2.47873
Up	ENSG00000113532	1.12179	0.0596	ST8SIA4	5q21.1	protein_coding	0.529452	0.512593	1.33212	1.42017	2.11195	2.0288
Up	ENSG00000169504	1.11937	0.0645	CLIC4	1p36.11	protein_coding	2.83186	3.07739	3.76772	3.86614	4.52598	4.48431
Up	ENSG00000182117	1.11915	0.00442	NOP10	15q14	protein_coding	3.33649	3.32565	3.70466	3.5472	4.51348	4.68183
Up	ENSG00000128965	1.1191	0.0198	CHAC1	15q15.1	protein_coding	0.124839	0.101369	0.672519	0.700151	1.59126	1.44638
Up	ZMYM6NB	1.11898	0.00147	NA	NANA	NA	1.0219	1.24271	1.29685	1.1706	2.32956	2.27442
Up	ENSG00000177791	1.11885	0.00167	MYOZ1	10q22.2	protein_coding	0.164585	0.0460408	0.212472	0.18474	1.401	1.14062
Up	ENSG00000112245	1.11533	0.00124	PTP4A1	6q12	protein_coding	2.42586	2.56062	2.58686	2.6919	3.67188	3.6914
Up	ENSG00000086061	1.11472	0.00108	DNAJA1	9p21.1	protein_coding	3.7293	3.66068	3.78391	3.85444	4.94241	4.80121
Up	ENSG00000148908	1.11466	0.00529	RGS10	10q26.11	protein_coding	1.89607	1.92881	2.19928	2.31271	3.14808	3.24967
Up	ENSG00000165457	1.11224	0.0558	FOLR2	11q13.4	protein_coding	0.609947	0.565511	1.34462	1.47859	2.15501	2.06879
Up	ENSG00000164691	1.11162	0.0178	TAGAP	6q25.3	protein_coding	0.708637	0.674086	1.28155	1.18448	1.99285	2.15476
Up	ENSG00000126787	1.11036	0.00119	DLGAP5	14q22.3	protein_coding	0.515342	0.562258	0.612849	0.72991	1.65367	1.77724
Up	ENSG00000103257	1.10889	0.0135	SLC7A5	16q24.2	protein_coding	2.62611	2.53001	1.99938	2.21572	3.40015	3.50323
Up	ENSG00000164587	1.10849	0.043	RPS14	5q33.1	protein_coding	7.59989	7.39039	6.76357	6.74811	8.26363	8.20434
Up	ENSG00000189057	1.10843	0.000668	FAM111B	11q12.1	protein_coding	0.905191	0.932246	1.06607	0.989317	2.0915	2.07177
Up	ENSG00000112984	1.10798	0.00096	KIF20A	5q31.2	protein_coding	0.541525	0.744873	0.63252	0.698603	1.7382	1.78652
Up	ENSG00000239713	1.10706	0.0977	APOBEC3G	22q13.1	protein_coding	0.480273	0.514409	1.58207	1.44575	2.04972	2.17565
Up	ENSG00000122952	1.10669	0.00201	ZWINT	10q21.1	protein_coding	1.53003	1.45493	1.33164	1.26024	2.41734	2.58446
Up	CNIH	1.10443	0.00478	NA	NANA	NA	2.20827	2.56589	2.39305	2.64312	3.50708	3.60695
Up	ENSG00000269811	1.10351	0.00237	SCGB2B3P	19q13.11	processed_pseudogene	0	0	0	0	1.2852	0.921832
Up	ENSG00000082153	1.10224	0.012	BZW1	2q33.1	protein_coding	3.70102	3.56885	4.04011	4.13617	4.88781	5.03975
Up	ENSG00000172673	1.10147	0.0122	THEMIS	6q22.33	protein_coding	0.204038	0.187109	0.682981	0.663635	1.48616	1.58566
Up	ENSG00000165304	1.10076	0.00153	MELK	9p13.2	protein_coding	1.0438	0.801301	0.787646	0.924687	1.97871	2.00153
Up	ENSG00000111012	1.10047	0.00121	CYP27B1	12q14.1	protein_coding	0.456803	0.332951	0.295999	0.356645	1.3615	1.56063
Up	ENSG00000254087	1.09998	0.0494	LYN	8q12.1	protein_coding	1.01399	0.833726	1.70782	1.68245	2.47301	2.34595
Up	ENSG00000138772	1.09941	0.0472	ANXA3	4q21.21	protein_coding	1.44927	1.36913	2.18184	2.18106	2.89379	2.89568
Up	ENSG00000137804	1.09911	0.00749	NUSAP1	15q15.1	protein_coding	1.71895	1.63325	2.01144	2.1159	3.01388	2.9241
Up	ENSG00000176485	1.09909	0.0349	PLA2G16	11q13.1	protein_coding	0.765177	0.809219	1.59245	1.29319	2.27988	2.14832
Up	ENSG00000171860	1.09796	0.00339	C3AR1	12p13.31	protein_coding	0.0896918	0.301263	0.348679	0.502553	1.39756	1.41945
Up	MS4A14	1.09736	0.000895	NA	NANA	NA	0.175301	0.199559	0.298091	0.275895	1.25935	1.4098
Up	ENSG00000126759	1.09678	0.000868	CFP	Xp11.23	protein_coding	0.877556	0.770697	0.679865	0.744964	1.84934	1.88077
Up	ENSG00000163584	1.0964	0.0151	RPL22L1	3q26.2	protein_coding	1.17418	0.824655	1.47545	1.42145	2.26721	2.37346
Up	ENSG00000000938	1.09583	0.00512	FGR	1p35.3	protein_coding	0.773035	0.685806	1.07538	1.06035	1.94909	2.03985
Up	ENSG00000111716	1.09571	0.00146	LDHB	12p12.1	protein_coding	3.33939	3.25615	3.24028	3.05993	4.32535	4.31395
Up	ENSG00000137078	1.09499	0.0105	SIT1	9p13.3	protein_coding	0.145135	0.0602417	0.572667	0.504984	1.34361	1.48788
Up	ENSG00000144655	1.09404	0.00157	CSRNP1	3p22.2	protein_coding	1.64369	1.46144	1.6518	1.74643	2.7427	2.69705
Up	ENSG00000145386	1.0937	0.00136	CCNA2	4q27	protein_coding	1.27859	1.02898	1.24163	1.14651	2.28613	2.24913
Up	ENSG00000145934	1.09334	0.022	TENM2	5q34	protein_coding	1.70387	1.77629	2.37955	2.2596	3.16829	3.07805
Up	ENSG00000186594	1.09332	0.00359	MIR22HG	17p13.3	lincRNA	2.10581	1.93077	2.10229	1.78126	3.16973	2.97697
Up	ENSG00000168209	1.09265	0.00547	DDIT4	10q22.1	protein_coding	2.78279	2.62507	2.99718	3.0531	3.88213	4.03224
Up	ENSG00000185477	1.09232	0.0401	GPRIN3	4q22.1	protein_coding	0.610538	0.786905	1.39136	1.43197	2.18521	2.10981
Up	ENSG00000113732	1.09154	0.00794	ATP6V0E1	5q35.1	protein_coding	3.60955	3.3731	3.85394	3.84416	4.84011	4.68335
Up	ENSG00000177105	1.09118	0.00318	RHOG	11p15.4	protein_coding	2.46691	2.56487	2.17857	2.35623	3.48931	3.47634
Up	ENSG00000146094	1.09103	0.00379	DOK3	5q35.3	protein_coding	0.846549	0.452641	0.674633	0.768315	1.71268	1.84046
Up	ENSG00000100632	1.09082	0.00979	ERH	14q24.1	protein_coding	3.05761	3.46929	3.27876	3.6521	4.44194	4.46858
Up	ENSG00000139318	1.08973	0.0489	DUSP6	12q21.33	protein_coding	1.72847	1.76336	2.53663	2.48517	3.12783	3.30844
Up	ENSG00000137474	1.08857	0.000544	MYO7A	11q13.5	protein_coding	0.258264	0.251286	0.343378	0.314093	1.42928	1.33137
Up	ENSG00000162704	1.08718	0.00781	ARPC5	1q25.3	protein_coding	3.29398	3.28587	3.66966	3.71764	4.56905	4.58888
Up	ENSG00000110700	1.08706	0.00413	RPS13	11p15.1	protein_coding	6.36173	6.53895	6.63048	6.78822	7.72152	7.61229
Up	ENSG00000143549	1.08568	0.00766	TPM3	1q21.3	protein_coding	3.766	3.81754	4.19351	4.18771	5.10362	5.05012
Up	ENSG00000157456	1.08566	0.00308	CCNB2	15q22.2	protein_coding	0.867839	1.17751	1.02087	1.20519	2.209	2.09801
Up	ENSG00000182899	1.08537	0.000685	RPL35A	3q29	protein_coding	6.36707	6.35431	6.43196	6.32749	7.52319	7.38797
Up	ENSG00000125995	1.08515	0.00167	ROMO1	20q11.22	protein_coding	3.19067	2.92845	2.93161	2.97376	4.09712	4.08542
Up	ENSG00000163297	1.08481	0.017	ANTXR2	4q21.21	protein_coding	1.38923	1.16928	1.85705	1.70235	2.59876	2.6298
Up	ENSG00000184588	1.08455	0.064	PDE4B	1p31.3	protein_coding	0.965809	1.04771	1.8839	1.8292	2.51211	2.5203
Up	ENSG00000153976	1.08261	0.00359	HS3ST3A1	17p12	protein_coding	0.61112	0.282118	0.272533	0.262944	1.47814	1.40143
Up	ENSG00000189067	1.08243	0.0169	LITAF	16p13.13	protein_coding	2.70632	2.71127	3.20068	3.27827	4.06006	4.05309
Up	ENSG00000158786	1.08165	0.0124	PLA2G2F	1p36.12	protein_coding	1.06017	0.890851	1.4343	1.43849	2.26903	2.30617
Up	ENSG00000157557	1.08078	0.00454	ETS2	21q22.2	protein_coding	3.96097	3.8385	3.61359	3.55835	4.82659	4.82067
Up	LOC339524	1.07969	0.0792	NA	NANA	NA	0.435035	0.274949	1.32553	1.20003	1.85256	1.92459
Up	LOC100130231	1.07962	0.00597	NA	NANA	NA	0.312664	0.100665	0.278826	0.589786	1.3306	1.4696
Up	ENSG00000100170	1.07918	0.00126	SLC5A1	22q12.3	protein_coding	0.859362	1.03563	1.08357	1.0576	2.04908	2.12736
Up	ENSG00000033867	1.07846	0.0164	SLC4A7	3p24.1	protein_coding	1.43682	1.71602	2.07099	2.05286	2.86787	2.92739
Up	ENSG00000137509	1.07829	0.0297	PRCP	11q14.1	protein_coding	2.29167	2.61398	3.05037	3.05836	3.87111	3.79266
Up	ENSG00000151689	1.07724	0.0005	INPP1	2q32.2	protein_coding	2.19035	2.24574	2.13177	2.22501	3.27731	3.27361
Up	ENSG00000155660	1.07701	0.00156	PDIA4	7q36.1	protein_coding	3.19726	3.00648	2.95392	2.9683	4.06545	4.15155
Up	ENSG00000159128	1.07641	0.0113	IFNGR2	21q22.11	protein_coding	2.2482	2.68387	2.80328	2.79582	3.65578	3.76263
Up	ENSG00000162757	1.07634	0.00363	C1orf74	1q32.2	protein_coding	1.18137	0.94259	1.08942	1.31014	2.11558	2.29887
Up	ENSG00000059804	1.07487	0.0379	SLC2A3	12p13.31	protein_coding	1.00122	1.06449	1.7971	1.64808	2.47593	2.42927
Up	ENSG00000274618	1.07435	0.0258	HIST1H4F	6p22.2	protein_coding	4.20535	4.28423	4.93527	4.74245	5.58329	5.64906
Up	ENSG00000197616	1.07417	0.000285	MYH6	14q11.2	protein_coding	0.0216354	0.0254535	0	0.0284106	1.06867	1.11742
Up	ENSG00000205544	1.07333	0.00143	TMEM256	17p13.1	protein_coding	2.27504	2.3403	2.11914	2.14423	3.24565	3.34036
Up	ENSG00000167996	1.07235	0.00826	FTH1	11q12.3	protein_coding	6.15951	6.15044	6.59201	6.51599	7.37829	7.47538
Up	ENSG00000089327	1.07209	0.00126	FXYD5	19q13.12	protein_coding	3.34042	3.49847	3.54291	3.35056	4.47417	4.53619
Up	ENSG00000088832	1.0716	0.00513	FKBP1A	20p13	protein_coding	3.98592	4.05617	4.36316	4.34033	5.2084	5.3076
Up	C7ORF29	1.07021	0.00538	NA	NANA	NA	0.89005	0.678224	0.775893	0.432122	1.70534	1.82322
Up	ENSG00000113387	1.06996	0.072	SUB1	5p13.3	protein_coding	2.32804	2.53746	3.29959	3.29912	3.96035	3.91166
Up	ENSG00000181467	1.06927	0.000685	RAP2B	3q25.2	protein_coding	1.97245	2.05833	2.11566	2.10223	3.09797	3.1649
Up	ENSG00000158125	1.06904	0.01	XDH	2p23.1	protein_coding	0.526098	0.436636	0.94965	0.839165	1.82769	1.68617
Up	ENSG00000196224	1.06864	0.000332	KRTAP5-3	11p15.5	protein_coding	0	0	0	0.0609036	1.08739	1.08034
Up	ENSG00000171195	1.06863	0.0697	MUC7	4q13.3	protein_coding	0	0.0575337	1.00128	0.753505	1.50446	1.53897
Up	ENSG00000072818	1.06806	0.024	ACAP1	17p13.1	protein_coding	1.02416	0.759331	1.3853	1.48891	2.14356	2.32142
Up	ENSG00000115232	1.06735	0.0995	ITGA4	2q31.3	protein_coding	0.577457	0.575533	1.56369	1.58187	2.15159	2.13239
Up	ENSG00000145632	1.06722	0.00872	PLK2	5q11.2	protein_coding	3.13132	3.04062	3.53954	3.43925	4.34021	4.3696
Up	ENSG00000188641	1.06572	0.0165	DPYD	1p21.3	protein_coding	2.2674	2.36876	2.89686	2.74962	3.65133	3.62143
Up	ENSG00000146425	1.06553	0.0353	DYNLT1	6q25.3	protein_coding	2.05943	2.57791	2.84098	2.92737	3.66737	3.66653
Up	ENSG00000131401	1.0646	0.0629	NAPSB	19q13.33	transcribed_unprocessed_pseudogene	0.750878	0.668417	1.40657	1.63058	2.11303	2.2444
Up	ENSG00000169299	1.06445	0.000544	PGM2	4p14	protein_coding	2.55987	2.58378	2.60948	2.66846	3.70856	3.63114
Up	ENSG00000198918	1.06433	0.00126	RPL39	Xq24	protein_coding	7.04224	7.25781	7.05877	7.18416	8.22125	8.1789
Up	ENSG00000187766	1.06279	0.00169	KRTAP10-8	21q22.3	protein_coding	0.25836	0.396894	0.271615	0.122885	1.38676	1.2637
Up	ENSG00000111639	1.06236	0.0245	MRPL51	12p13.31	protein_coding	2.89115	3.14997	3.60945	3.56211	4.39056	4.34051
Up	ENSG00000144746	1.06114	0.0148	ARL6IP5	3p14.1	protein_coding	3.16481	3.2596	3.61723	3.76643	4.55106	4.47525
Up	ENSG00000244411	1.06102	0.0134	KRTAP5-7	11q13.4	protein_coding	0	0.0861177	0.135264	0.11949	1.4781	0.814377
Up	ENSG00000197872	1.06064	0.0247	FAM49A	2p24.2	protein_coding	0.572231	0.549071	1.1954	1.10869	1.95453	1.87944
Up	ENSG00000230989	1.05987	0.00242	HSBP1	16q23.3	protein_coding	2.66014	2.42815	2.70309	2.73079	3.64541	3.73541
Up	ENSG00000105609	1.05955	0.0433	LILRB5	19q13.42	protein_coding	0.439593	0.32922	1.00285	1.15065	1.67428	1.90597
Up	ENSG00000163874	1.05946	0.083	ZC3H12A	1p34.3	protein_coding	2.88859	2.72349	1.90952	1.88109	3.43949	3.38078
Up	ENSG00000147251	1.05888	0.0104	DOCK11	Xq24	protein_coding	1.20425	1.28968	1.64789	1.70831	2.51109	2.53173
Up	ENSG00000197965	1.05836	0.0265	MPZL1	1q24.2	protein_coding	2.32718	2.49927	3.03195	2.98243	3.80696	3.73017
Up	ENSG00000205155	1.05824	0.00278	PSENEN	19q13.12	protein_coding	2.27147	2.3919	2.55088	2.56235	3.57497	3.4298
Up	ENSG00000069493	1.05776	0.0198	CLEC2D	12p13.31	protein_coding	1.04494	1.03186	1.56746	1.60465	2.39183	2.34814
Up	ENSG00000080824	1.05708	0.000636	HSP90AA1	14q32.31	protein_coding	5.15656	5.19937	5.22522	5.13364	6.2944	6.17714
Up	ENSG00000139433	1.05647	0.00146	GLTP	12q24.11	protein_coding	4.62866	4.66206	4.43292	4.49881	5.64755	5.57662
Up	ENSG00000178562	1.05616	0.00164	CD28	2q33.2	protein_coding	0.0693307	0.0751134	0.302608	0.239805	1.23084	1.22492
Up	ENSG00000142669	1.0559	0.00268	SH3BGRL3	1p36.11	protein_coding	4.20234	4.29875	4.44952	4.53151	5.4478	5.40506
Up	KIAA1551	1.05543	0.0181	NA	NANA	NA	2.81036	3.09861	3.40586	3.47773	4.28585	4.22128
Up	ENSG00000158055	1.05408	0.0408	GRHL3	1p36.11	protein_coding	2.8768	2.82757	2.10862	2.19413	3.54715	3.56456
Up	ENSG00000163710	1.05283	0.0013	PCOLCE2	3q23	protein_coding	0.167643	0.19999	0.313081	0.393119	1.34277	1.29982
Up	LOC654433	1.05139	0.00112	NA	NANA	NA	1.45603	1.5214	1.67317	1.57012	2.57898	2.63416
Up	ENSG00000095794	1.05133	0.00773	CREM	10p11.21	protein_coding	0.932714	1.05931	1.24375	1.43719	2.27688	2.16226
Up	ENSG00000166278	1.04873	0.0571	C2	6p21.33	protein_coding	0.653355	0.625667	1.51222	1.32253	2.05408	2.10028
Up	ENSG00000132646	1.0477	0.00512	PCNA	20p12.3	protein_coding	2.85826	2.59358	3.05537	2.89356	3.92289	3.8729
Up	ENSG00000165272	1.04709	0.022	AQP3	9p13.3	protein_coding	6.72748	6.7592	6.15929	6.19857	7.52475	7.4917
Up	ENSG00000101445	1.047	0.00876	PPP1R16B	20q11.23	protein_coding	0.792677	0.635068	1.13344	1.0744	1.95762	1.95416
Up	ENSG00000113396	1.04671	0.0157	SLC27A6	5q23.3	protein_coding	0.739893	0.790606	1.21839	1.30171	2.09892	2.0198
Up	ENSG00000241598	1.04662	0.00366	KRTAP5-4	11p15.5	protein_coding	0.222876	0.124012	0.115399	0.0881644	0.991883	1.37659
Up	ENSG00000204262	1.04572	0.00489	COL5A2	2q32.2	protein_coding	2.62204	2.49892	2.93955	2.74316	3.75797	3.73529
Up	SLMO2	1.04545	0.0618	NA	NANA	NA	1.33879	1.8433	2.28215	2.31444	3.11158	2.86865
Up	ENSG00000159377	1.04411	0.00103	PSMB4	1q21.3	protein_coding	4.26172	4.07065	4.25292	4.20736	5.25721	5.22733
Up	ENSG00000168374	1.04376	0.0122	ARF4	3p14.3	protein_coding	3.13417	3.27204	3.44613	3.74283	4.4763	4.4088
Up	ENSG00000130595	1.0434	0.0589	TNNT3	11p15.5	protein_coding	1.90403	1.72188	0.959561	1.12564	2.53485	2.40751
Up	ENSG00000067167	1.04339	0.0935	TRAM1	8q13.3	protein_coding	2.86571	3.04849	3.89705	3.882	4.55939	4.374
Up	ENSG00000106153	1.04328	0.00148	CHCHD2	7p11.2	protein_coding	4.47719	4.34009	4.5353	4.46397	5.40513	5.5897
Up	ENSG00000135404	1.04187	0.0235	CD63	12q13.2	protein_coding	4.80138	4.83937	5.4644	5.28582	6.19599	6.08324
Up	ENSG00000027869	1.04184	0.00702	SH2D2A	1q23.1	protein_coding	0.275095	0.094442	0.587343	0.398472	1.31109	1.45027
Up	ENSG00000102144	1.04153	0.000985	PGK1	Xq21.1	protein_coding	4.36128	4.36621	4.4684	4.51698	5.51578	5.42372
Up	ENSG00000237651	1.04007	0.0273	C2orf74	2p15	protein_coding	1.83403	1.45823	1.24877	1.03209	2.52269	2.34401
Up	ENSG00000177606	1.03996	0.00236	JUN	1p32.1	protein_coding	2.46673	2.31555	2.64491	2.49978	3.48565	3.55777
Up	ENSG00000172172	1.03968	0.0102	MRPL13	8q24.12	protein_coding	1.59954	1.45063	1.967	1.86251	2.67871	2.84048
Up	ENSG00000161905	1.03922	0.00111	ALOX15	17p13.2	protein_coding	0.642919	0.626253	0.509925	0.488792	1.54763	1.66475
Up	ENSG00000189143	1.03871	0.00847	CLDN4	7q11.23	protein_coding	2.78544	2.81492	2.32597	2.67612	3.62816	3.75049
Up	ENSG00000077420	1.03644	0.0751	APBB1IP	10p12.1	protein_coding	0.329779	0.661672	1.30327	1.32351	2.0505	1.8315
Up	ENSG00000114315	1.0364	0.00291	HES1	3q29	protein_coding	3.95113	3.74344	3.73701	3.58661	4.77358	4.8083
Up	ENSG00000128383	1.03477	0.0235	APOBEC3A	22q13.1	protein_coding	1.74314	1.10861	1.18517	1.00604	2.28624	2.30478
Up	ENSG00000159720	1.03457	0.0025	ATP6V0D1	16q22.1	protein_coding	3.1109	2.92744	2.77856	3.01198	3.98821	3.99537
Up	ENSG00000164062	1.03441	0.00853	APEH	3p21.31	protein_coding	2.60363	2.61378	2.25178	2.18058	3.41911	3.47459
Up	ENSG00000117724	1.0342	0.00133	CENPF	1q41	protein_coding	1.22394	1.2011	1.38188	1.40043	2.33976	2.33231
Up	ENSG00000092054	1.03408	0.000522	MYH7	14q11.2	protein_coding	0.0766494	0.110612	0.00932527	0.0120605	1.09587	1.07662
Up	ENSG00000141968	1.03299	0.0335	VAV1	19p13.3	protein_coding	0.559902	0.369408	1.13845	1.04047	1.7766	1.84349
Up	ENSG00000180596	1.03263	0.00506	HIST1H2BC	6p22.2	protein_coding	5.41142	5.32083	5.6018	5.73575	6.58036	6.5198
Up	ENSG00000116649	1.03238	0.018	SRM	1p36.22	protein_coding	2.87762	2.583	2.20248	2.32941	3.49757	3.56344
Up	ENSG00000211445	1.03226	0.0271	GPX3	5q33.1	protein_coding	2.60781	2.51282	3.22987	3.05314	3.89414	3.8722
Up	ENSG00000196154	1.03205	0.0162	S100A4	1q21.3	protein_coding	4.45969	4.31137	4.86022	4.88763	5.68276	5.6408
Up	LOC401397	1.03135	0.0198	NA	NANA	NA	1.61365	1.82955	2.20605	2.1949	3.12225	2.86252
Up	ENSG00000143977	1.03101	0.0349	SNRPG	2p13.3	protein_coding	3.09733	3.31874	3.80772	3.85671	4.62043	4.48185
Up	ENSG00000121316	1.03021	0.02	PLBD1	12p13.1	protein_coding	1.83429	1.90455	2.28587	2.4822	3.12682	3.18706
Up	ENSG00000153283	1.02885	0.00501	CD96	3q13.13	protein_coding	0.868207	0.615522	0.9788	1.01931	1.84677	1.95186
Up	ENSG00000101224	1.02851	0.000784	CDC25B	20p13	protein_coding	2.09449	2.2088	2.05232	2.17073	3.14972	3.17046
Up	ENSG00000198931	1.02848	0.0921	APRT	16q24.3	protein_coding	4.43136	4.11861	3.33135	3.42957	4.93741	4.775
Up	ENSG00000135821	1.02815	0.0026	GLUL	1q25.3	protein_coding	4.28505	4.1971	4.47589	4.48403	5.37787	5.39947
Up	ENSG00000131378	1.02772	0.0301	RFTN1	3p24.3	protein_coding	2.02766	1.96032	2.6637	2.54112	3.30277	3.34908
Up	ENSG00000182566	1.02689	0.000522	CLEC4G	19p13.2	protein_coding	0	0.109641	0.0457376	0.039438	1.10088	1.05032
Up	ENSG00000168275	1.02668	0.000803	COA6	1q42.2	protein_coding	1.42435	1.415	1.37361	1.53128	2.42904	2.49645
Up	ENSG00000146192	1.02651	0.0741	FGD2	6p21.2	protein_coding	1.15372	0.879154	1.88025	1.8094	2.46028	2.454
Up	ENSG00000105131	1.02627	0.0145	EPHX3	19p13.12	protein_coding	2.49463	2.5691	2.06966	2.04616	3.29537	3.34694
Up	ENSG00000022267	1.02608	0.000763	FHL1	Xq26.3	protein_coding	3.0239	3.07215	3.10066	3.10417	4.17423	4.02837
Up	ENSG00000153551	1.02576	0.0343	CMTM7	3p22.3	protein_coding	0.517433	1.006	1.25471	1.34776	2.04414	2.07033
Up	ATP5G1	1.02531	0.00612	NA	NANA	NA	3.3105	3.29359	2.95847	3.42485	4.26961	4.27471
Up	ENSG00000141753	1.02502	0.00869	IGFBP4	17q21.2	protein_coding	3.89688	3.6192	4.1591	4.00194	4.98019	4.9084
Up	ENSG00000188042	1.02469	0.00674	ARL4C	2q37.1	protein_coding	1.92309	1.8216	2.20279	2.24461	3.05634	3.08908
Up	ENSG00000055163	1.02437	0.0392	CYFIP2	5q33.3	protein_coding	0.581463	0.580567	1.33048	1.1572	1.93276	1.94084
Up	ENSG00000094963	1.02397	0.00869	FMO2	1q24.3	protein_coding	0.327629	0.164809	0.642157	0.594504	1.50274	1.40975
Up	ENSG00000118508	1.02364	0.00119	RAB32	6q24.3	protein_coding	1.02598	0.976036	1.15059	1.13983	2.04801	2.14549
Up	ENSG00000078668	1.02355	0.000516	VDAC3	8p11.21	protein_coding	2.81388	2.74251	2.84253	2.75214	3.80554	3.81709
Up	ENSG00000134419	1.02344	0.00821	RPS15A	16p12.3	protein_coding	7.00273	7.1666	7.4301	7.40801	8.3865	8.1641
Up	ENSG00000168961	1.02218	0.0344	LGALS9	17q11.2	protein_coding	1.46589	1.23867	1.99539	1.9461	2.64158	2.7258
Up	ENSG00000152580	1.02181	0.00441	IGSF10	3q25.1	protein_coding	0.878994	0.969235	1.21878	1.22382	2.11157	2.07745
Up	ENSG00000196684	1.02164	0.00748	HSH2D	19p13.11	protein_coding	0.143848	0.0595744	0.394895	0.520659	1.27585	1.32691
Up	ENSG00000097021	1.02148	0.00237	ACOT7	1p36.31	protein_coding	2.00869	1.87901	1.69913	1.7788	2.83523	2.89054
Up	ENSG00000131174	1.02132	0.0647	COX7B	Xq21.1	protein_coding	4.39911	4.73849	5.34204	5.33327	5.99193	5.95718
Up	ENSG00000130066	1.0212	0.000341	SAT1	Xp22.11	protein_coding	4.50017	4.48244	4.51577	4.49621	5.4916	5.54811
Up	ENSG00000104894	1.02117	0.0691	CD37	19q13.33	protein_coding	1.27488	0.858801	1.63675	1.96077	2.39526	2.51268
Up	ENSG00000144452	1.02104	0.0017	ABCA12	2q35	protein_coding	2.56846	2.67891	2.41727	2.46547	3.57334	3.5338
Up	ENSG00000004779	1.0207	0.0137	NDUFAB1	16p12.2	protein_coding	2.58797	3.22911	2.89361	2.96467	3.87697	4.00212
Up	ENSG00000197409	1.02069	0.0137	HIST1H3D	6p22.2	protein_coding	3.47803	3.47887	3.02063	3.03909	4.36323	4.18647
Up	ENSG00000091986	1.0193	0.0769	CCDC80	3q13.2	protein_coding	3.67868	3.69392	4.49811	4.58347	5.10534	5.16036
Up	MGC12916	1.01782	0.00305	NA	NANA	NA	0.321463	0.379836	0.515588	0.255647	1.51114	1.26076
Up	ENSG00000115233	1.01683	0.00429	PSMD14	2q24.2	protein_coding	2.32768	2.65836	2.49737	2.71015	3.57959	3.55085
Up	ENSG00000151892	1.01632	0.000516	GFRA1	10q25.3	protein_coding	1.43253	1.52205	1.54035	1.48684	2.51601	2.50752
Up	ENSG00000136247	1.01603	0.00519	ZDHHC4	7p22.1	protein_coding	1.27089	1.33972	1.57666	1.638	2.40299	2.54171
Up	ENSG00000164054	1.016	0.00257	SHISA5	3p21.31	protein_coding	3.47955	3.25073	3.2029	3.20328	4.35422	4.24601
Up	EMR2	1.01579	0.00126	NA	NANA	NA	0.61169	0.704538	0.546869	0.553865	1.53941	1.70064
Up	ENSG00000129235	1.01559	0.00301	TXNDC17	17p13.1	protein_coding	1.09999	1.07965	1.11364	1.21776	1.97716	2.30955
Up	GSG2	1.01526	0.00104	NA	NANA	NA	0.386669	0.190553	0.281708	0.224743	1.27215	1.3002
Up	ENSG00000164251	1.01515	0.0238	F2RL1	5q13.3	protein_coding	2.24585	2.37977	1.69027	1.89008	2.98061	3.15267
Up	ENSG00000176788	1.01507	0.0867	BASP1	5p15.1	protein_coding	1.79233	2.0662	2.83949	2.75561	3.30846	3.44849
Up	ENSG00000166825	1.01453	0.0291	ANPEP	15q26.1	protein_coding	1.42196	1.38786	1.97329	2.03122	2.76029	2.67594
Up	ENSG00000153094	1.01438	0.0141	BCL2L11	2q13	protein_coding	1.26764	1.28043	1.78123	1.69385	2.52664	2.5137
Up	ENSG00000111229	1.01367	0.0122	ARPC3	12q24.11	protein_coding	4.37255	4.3522	4.71048	4.86966	5.59357	5.58622
Up	C10ORF128	1.01357	0.0195	NA	NANA	NA	1.25527	0.647485	0.832255	1.21629	2.06995	1.93283
Up	ENSG00000117308	1.01325	0.0056	GALE	1p36.11	protein_coding	1.30447	1.18884	1.00442	0.902584	2.03307	2.19359
Up	ENSG00000165672	1.01308	0.0041	PRDX3	10q26.11	protein_coding	2.3004	2.34012	2.59683	2.61827	3.44281	3.51116
Up	ENSG00000171310	1.01165	0.00502	CHST11	12q23.3	protein_coding	0.491578	0.678959	0.881735	0.850764	1.7837	1.69111
Up	ENSG00000172578	1.01086	0.00798	KLHL6	3q27.1	protein_coding	0.23456	0.168709	0.584569	0.563065	1.43345	1.36373
Up	ENSG00000119705	1.01048	0.0278	SLIRP	14q24.3	protein_coding	3.04435	3.44739	3.78296	3.4786	4.64023	4.25737
Up	ENSG00000170571	1.01042	0.00257	EMB	5q11.1	protein_coding	1.91046	2.17168	2.00991	2.20533	3.08838	3.08115
Up	ENSG00000139343	1.01009	0.0597	SNRPF	12q23.1	protein_coding	2.12237	2.14504	2.92488	2.87903	3.47032	3.58552
Up	FAM108C1	1.0094	0.0247	NA	NANA	NA	1.0539	0.883076	1.53188	1.51236	2.2507	2.25871
Up	ENSG00000117410	1.00938	0.00581	ATP6V0B	1p34.1	protein_coding	3.00116	2.64408	2.62948	2.90228	3.86693	3.74034
Up	LOC100507066	1.0082	0.0025	NA	NANA	NA	0.75497	0.990403	0.893116	1.05812	1.88749	1.97722
Up	ENSG00000135447	1.00756	0.0132	PPP1R1A	12q13.2	protein_coding	0	0.151283	0.536669	0.493195	1.31572	1.28997
Up	ENSG00000163564	1.00725	0.044	PYHIN1	1q23.1	protein_coding	0.133479	0.108344	0.692201	0.88435	1.54198	1.38171
Up	ENSG00000183918	1.00709	0.0204	SH2D1A	Xq25	protein_coding	0.16685	0.109826	0.613565	0.686356	1.32099	1.4815
Up	ENSG00000165997	1.00706	0.00512	ARL5B	10p12.31	protein_coding	1.5421	1.69769	1.94731	1.87737	2.80397	2.74239
Up	ENSG00000114978	1.00643	0.00713	MOB1A	2p13.1	protein_coding	3.42141	3.70837	3.72869	3.92767	4.70861	4.69732
Up	MB21D1	1.00631	0.00801	NA	NANA	NA	0.433021	0.536762	0.922661	0.742018	1.66892	1.66093
Up	ENSG00000197756	1.00507	0.000685	RPL37A	2q35	protein_coding	7.69745	7.82698	7.81545	7.81233	8.77396	8.81229
Up	ENSG00000128524	1.00494	0.00121	ATP6V1F	7q32.1	protein_coding	3.29361	3.39143	3.17477	3.24483	4.25746	4.30473
Up	ENSG00000140030	1.00485	0.00288	GPR65	14q31.3	protein_coding	0.572352	0.305822	0.590667	0.612773	1.53477	1.51573
Up	ENSG00000137752	1.00479	0.0305	CASP1	11q22.3	protein_coding	2.6565	2.55595	3.11112	3.27896	3.92798	3.88287
Up	ENSG00000100292	1.00448	0.0824	HMOX1	22q12.3	protein_coding	1.31224	1.06849	2.04678	2.03714	2.61434	2.62694
Up	ENSG00000100060	1.0043	0.00366	MFNG	22q13.1	protein_coding	0.691429	0.733873	0.467714	0.816196	1.75127	1.61194
Up	ENSG00000124575	1.00313	0.00856	HIST1H1D	6p22.2	protein_coding	4.6368	4.27934	4.54298	4.15999	5.40369	5.41213
Up	ENSG00000185905	1.00264	0.0025	C16orf54	16p11.2	protein_coding	0.413916	0.156403	0.440999	0.402326	1.32134	1.39076
Up	ENSG00000221983	1.00158	0.00471	UBA52	19p13.11	protein_coding	3.59739	3.58722	3.28565	3.3934	4.35794	4.57706
Up	ENSG00000183598	1.0006	0.0459	HIST2H3D	1q21.2	protein_coding	2.80907	2.81058	2.59325	1.96049	3.51588	3.57202
Down	ENSG00000134824	-4.77039	8.16e-05	FADS2	11q12.2	protein_coding	5.86522	5.86801	6.17982	6.064	1.23146	1.21628
Down	ENSG00000164434	-4.32323	0.00413	FABP7	6q22.31	protein_coding	3.93967	4.10798	5.39284	5.26774	0.254571	0.453088
Down	ENSG00000185640	-4.19377	0.000344	KRT79	12q13.13	protein_coding	5.40251	5.10091	5.70981	5.52887	1.24926	1.23426
Down	ENSG00000162877	-4.15949	0.00104	PM20D1	1q32.1	protein_coding	4.28139	4.2653	5.04147	4.94963	0.419553	0.53036
Down	ENSG00000179593	-3.50868	0.000394	ALOX15B	17p13.1	protein_coding	4.28209	4.27326	4.62183	4.69599	0.922226	0.997003
Down	ENSG00000069482	-3.36769	0.00102	GAL	11q13.2	protein_coding	3.57618	3.41043	4.00453	4.08137	0.480135	0.320734
Down	ENSG00000151365	-3.29077	8.16e-05	THRSP	11q14.1	protein_coding	4.79466	4.64583	4.87171	4.76264	1.51639	1.43948
Down	ENSG00000198854	-3.10505	0.000522	C1orf68	1q21.3	protein_coding	4.17595	4.30014	3.91141	3.95247	1.13255	0.827332
Down	ENSG00000184210	-3.06354	0.0142	DGAT2L6	Xq13.1	protein_coding	2.41674	2.30465	3.78687	3.81767	0	0.0358915
Down	ENSG00000103740	-3.03861	0.000219	ACSBG1	15q25.1	protein_coding	3.89763	3.72909	4.02576	3.92524	0.76282	0.948823
Down	ENSG00000188984	-3.02147	0.000167	AADACL3	1p36.21	protein_coding	2.88023	2.95467	3.13083	3.12016	0	0
Down	ENSG00000165953	-2.9762	0.00292	SERPINA12	14q32.13	protein_coding	4.68049	4.6644	3.89239	3.85888	1.29768	1.298
Down	ENSG00000119915	-2.86201	0.00867	ELOVL3	10q24.32	protein_coding	3.06764	2.91597	4.13342	4.05661	0.506388	0.856414
Down	ENSG00000147160	-2.85614	0.000264	AWAT2	Xq13.1	protein_coding	2.71101	2.89643	3.03152	3.01427	0.0859146	0.0284179
Down	ENSG00000172867	-2.81355	0.00342	KRT2	12q13.13	protein_coding	7.72292	7.73024	8.49033	8.54995	5.27465	5.34497
Down	ENSG00000203782	-2.79119	0.00428	LOR	1q21.3	protein_coding	5.0093	4.82454	4.04286	4.19798	1.52999	1.92497
Down	ENSG00000126368	-2.78778	0.0219	NR1D1	17q21.1	protein_coding	2.82938	2.9495	4.44196	4.37604	0.821302	0.901589
Down	ENSG00000149485	-2.76019	0.00154	FADS1	11q12.2	protein_coding	3.79778	3.85305	4.40308	4.38868	1.35222	1.34869
Down	ENSG00000186207	-2.75637	0.0118	LCE5A	1q21.3	protein_coding	3.46237	3.24901	2.26801	2.04611	0	0
Down	ENSG00000149043	-2.71536	0.0154	SYT8	11p15.5	protein_coding	4.37088	4.13937	3.02982	2.89719	1.01506	0.772856
Down	ENSG00000214491	-2.63801	0.0131	SEC14L6	22q12.2	protein_coding	2.51325	1.73763	3.22564	3.17557	0	0.0500296
Down	ENSG00000125571	-2.63474	0.00201	IL37	2q14.1	protein_coding	2.96326	3.24555	2.47201	2.60987	0.252894	0.122967
Down	ENSG00000159455	-2.62063	0.00306	LCE2B	1q21.3	protein_coding	4.92786	5.22529	4.28999	4.57521	2.06794	2.19997
Down	ENSG00000130598	-2.54406	0.0208	TNNI2	11p15.5	protein_coding	4.3509	3.86137	2.91259	2.68285	0.872377	0.943351
Down	ENSG00000148600	-2.51651	0.0354	CDHR1	10q23.1	protein_coding	6.76405	6.72372	5.1946	5.07201	3.43967	3.4045
Down	ENSG00000186526	-2.47108	0.00167	CYP4F8	19p13.12	protein_coding	2.19983	2.33134	2.86652	2.67866	0.032858	0.0631423
Down	ENSG00000134569	-2.29881	0.0108	LRP4	11p11.2	protein_coding	4.49415	4.41069	3.53243	3.41676	1.63337	1.69604
Down	ENSG00000169710	-2.28245	0.00831	FASN	17q25.3	protein_coding	5.99845	5.65865	5.00805	4.93696	3.10215	3.13401
Down	ENSG00000186844	-2.27995	0.00676	LCE1A	1q21.3	protein_coding	4.22588	4.11975	3.57899	3.25033	1.67137	1.3562
Down	ENSG00000240386	-2.23002	0.00167	LCE1F	1q21.3	protein_coding	3.89512	3.82462	3.513	3.3886	1.26505	1.58558
Down	ENSG00000197084	-2.20541	0.0109	LCE1C	1q21.3	protein_coding	4.62039	4.49736	3.7841	3.49407	1.9048	1.88235
Down	ENSG00000143631	-2.20515	0.0013	FLG	1q21.3	protein_coding	7.27879	7.34086	7.70895	7.74231	5.26592	5.35923
Down	ENSG00000203786	-2.19095	0.000949	KPRP	1q21.3	protein_coding	3.75476	4.09822	3.66806	3.99115	1.65852	1.71566
Down	ENSG00000175315	-2.17246	0.0647	CST6	11q13.1	protein_coding	5.00676	4.9987	6.71387	6.73888	3.71486	3.66932
Down	ENSG00000162040	-2.17014	0.00579	HS3ST6	16p13.3	protein_coding	3.30988	3.14548	2.47242	2.56207	0.57838	0.826271
Down	ENSG00000095321	-2.15422	0.0402	CRAT	9q34.11	protein_coding	3.29967	3.18293	4.6875	4.67712	1.80848	1.8067
Down	ENSG00000187180	-2.07873	0.0133	LCE2C	1q21.3	protein_coding	4.11293	4.31417	3.22868	3.31743	1.63154	1.6976
Down	ENSG00000188393	-2.04375	0.00121	CLEC2A	12p13.31	protein_coding	3.16459	3.33258	3.38297	3.6793	1.32272	1.3695
Down	ENSG00000171680	-2.01002	0.0398	PLEKHG5	1p36.31	protein_coding	5.56451	5.26317	4.19583	3.99862	2.77811	2.71291
Down	ENSG00000049246	-2.00539	0.000133	PER3	1p36.23	protein_coding	3.3153	3.41082	3.39145	3.3657	1.41976	1.3111
Down	ENSG00000187173	-1.99281	0.0132	LCE2A	1q21.3	protein_coding	3.92457	3.94179	3.2989	2.88914	1.67016	1.37144
Down	ENSG00000133110	-1.97993	0.00604	POSTN	13q13.3	protein_coding	5.84814	6.03372	5.17658	5.406	3.57194	3.70042
Down	ENSG00000196734	-1.90641	0.0205	LCE1B	1q21.3	protein_coding	3.66865	3.44481	2.49537	2.66312	1.30158	1.02157
Down	ENSG00000130055	-1.89465	0.0705	GDPD2	Xq13.1	protein_coding	3.13335	3.3131	1.65657	1.71	0.664929	0.452287
Down	ENSG00000189182	-1.87937	0.0277	KRT77	12q13.13	protein_coding	4.75501	4.64918	3.62862	3.5663	2.25903	2.28178
Down	ENSG00000160862	-1.87615	0.0109	AZGP1	7q22.1	protein_coding	5.01807	5.05216	5.8342	5.75955	3.36101	3.71868
Down	ENSG00000143520	-1.85879	0.000541	FLG2	1q21.3	protein_coding	5.66442	5.89864	5.74385	5.86634	3.8554	4.01363
Down	ENSG00000166869	-1.83856	0.00897	CHP2	16p12.2	protein_coding	3.63379	3.68624	2.91839	2.96891	1.34873	1.57782
Down	ENSG00000103319	-1.79826	0.0252	EEF2K	16p12.2	protein_coding	5.08316	4.90089	3.97378	3.97169	2.67722	2.69102
Down	ENSG00000235942	-1.79204	0.0139	LCE6A	1q21.3	protein_coding	2.56422	2.62785	1.86975	2.15082	0.117452	0.904794
Down	C1ORF51	-1.78923	0.0182	NA	NANA	NA	1.66836	2.06525	2.74283	2.72724	0.543681	0.479704
Down	ENSG00000091128	-1.78236	0.0989	LAMB4	7q31.1	protein_coding	4.71627	4.64955	2.99645	3.04775	1.99718	2.14311
Down	ENSG00000198483	-1.74555	0.00888	ANKRD35	1q21.1	protein_coding	4.22547	4.02616	3.52023	3.39416	1.9785	2.11341
Down	ENSG00000100341	-1.68947	0.00026	PNPLA5	22q13.31	protein_coding	1.76811	1.71282	1.59594	1.68099	0	0
Down	ENSG00000064763	-1.67851	0.0104	FAR2	12p11.22	protein_coding	2.72014	2.97413	3.51159	3.53478	1.5656	1.44771
Down	ENSG00000178776	-1.6543	0.000749	C5orf46	5q32	protein_coding	2.47104	2.60148	2.28689	2.4015	0.810437	0.761414
Down	ENSG00000181652	-1.64806	0.00092	ATG9B	7q36.1	protein_coding	2.53626	2.57557	2.69947	2.72011	0.84659	1.123
Down	ENSG00000105516	-1.64199	0.0035	DBP	19q13.33	protein_coding	3.06844	2.84104	3.42968	3.33873	1.53586	1.51911
Down	ENSG00000114270	-1.6387	0.0953	COL7A1	3p21.31	protein_coding	6.24281	5.69413	4.58764	4.44257	3.60201	3.60417
Down	ENSG00000157368	-1.63603	0.0699	IL34	16q22.1	protein_coding	4.00169	3.7671	2.6319	2.4955	1.59082	1.58522
Down	ENSG00000149527	-1.59676	0.0325	PLCH2	1p36.32	protein_coding	4.73899	4.44489	3.70961	3.54837	2.50225	2.52517
Down	ENSG00000198039	-1.59659	0.00458	ZNF273	7q11.21	protein_coding	3.4826	3.66243	3.08846	3.09383	1.72641	1.74407
Down	ENSG00000196557	-1.56698	0.000394	CACNA1H	16p13.3	protein_coding	1.89874	1.70403	1.85026	1.84345	0.235078	0.279205
Down	ENSG00000106123	-1.55875	0.0402	EPHB6	7q34	protein_coding	5.20148	4.9787	4.15778	3.97812	3.01567	3.02488
Down	ENSG00000167508	-1.55309	0.0126	MVD	16q24.2	protein_coding	4.06899	3.63886	3.27367	3.22688	1.88014	2.11789
Down	ENSG00000178597	-1.5398	0.0146	PSAPL1	4p16.1	protein_coding	2.13627	2.13758	2.88129	2.84626	0.92874	0.992357
Down	ENSG00000172824	-1.53764	0.0139	CES4A	16q22.1	protein_coding	3.52217	3.42728	2.84303	2.71624	1.50642	1.67266
Down	ENSG00000213366	-1.52988	0.0453	GSTM2	1p13.3	protein_coding	4.21808	4.2306	3.12756	3.21104	2.26958	2.06429
Down	ENSG00000105357	-1.5297	0.00546	MYH14	19q13.33	protein_coding	4.03389	3.88835	3.55579	3.39328	2.18187	2.19439
Down	XGPY2	-1.52615	0.0151	NA	NANA	NA	2.13374	1.89528	2.74215	2.70045	0.872012	0.811504
Down	ENSG00000062282	-1.52278	0.00288	DGAT2	11q13.5	protein_coding	4.03989	3.86119	4.30628	4.34218	2.6027	2.62651
Down	ENSG00000138162	-1.49925	0.0441	TACC2	10q26.13	protein_coding	5.13757	4.88425	3.98922	3.99499	3.00537	2.99914
Down	ENSG00000247675	-1.49802	0.0198	LRP4-AS1	11p11.2	antisense	2.27118	2.35349	1.47076	1.60476	0.463965	0.390094
Down	ENSG00000187583	-1.4956	0.0138	PLEKHN1	1p36.33	protein_coding	3.49723	3.24065	2.89579	2.59053	1.61982	1.50108
Down	ENSG00000116882	-1.48949	0.00432	HAO2	1p12	protein_coding	1.86933	1.79355	1.36162	1.43876	0.210595	0.0420582
Down	ENSG00000167074	-1.48402	0.00665	TEF	22q13.2	protein_coding	3.35023	3.13746	2.69284	2.78704	1.50828	1.50747
Down	ENSG00000100344	-1.46056	0.00145	PNPLA3	22q13.31	protein_coding	1.97529	1.7856	1.64834	1.69141	0.22258	0.406616
Down	ENSG00000118194	-1.45587	0.0567	TNNT2	1q32.1	protein_coding	2.88353	2.80139	1.70624	1.8641	1.0481	0.667792
Down	ENSG00000106258	-1.45148	0.00537	CYP3A5	7q22.1	protein_coding	3.63828	3.70659	3.20787	3.20297	1.91796	2.05693
Down	ENSG00000131037	-1.43938	0.0317	EPS8L1	19q13.42	protein_coding	4.36248	4.01281	3.37259	3.37085	2.17096	2.50966
Down	ENSG00000076826	-1.43197	0.0421	CAMSAP3	19p13.2	protein_coding	4.02805	3.68158	2.94573	2.89336	1.88815	2.02226
Down	ENSG00000187223	-1.42989	0.00608	LCE2D	1q21.3	protein_coding	2.29551	1.8017	2.37625	2.04213	0.557983	0.840039
Down	ENSG00000165238	-1.42891	0.0532	WNK2	9q22.31	protein_coding	3.22856	2.89682	2.06782	2.01036	1.09089	1.15308
Down	ENSG00000103089	-1.41811	0.0198	FA2H	16q23.1	protein_coding	1.30914	1.53886	2.08355	2.20078	0.339816	0.390135
Down	ENSG00000112972	-1.39351	0.0176	HMGCS1	5p12	protein_coding	3.79391	3.93541	4.57163	4.54327	2.84746	2.78763
Down	ENSG00000178038	-1.38405	0.0852	ALS2CL	3p21.31	protein_coding	4.93768	4.5988	3.61071	3.5415	2.75928	2.81697
Down	ENSG00000126233	-1.37419	0.00222	SLURP1	8q24.3	protein_coding	3.8876	4.02498	3.82044	3.70354	2.64134	2.32856
Down	ENSG00000180071	-1.37291	0.0029	ANKRD18A	9p13.1	protein_coding	2.05217	2.1426	1.80057	1.71154	0.583359	0.524271
Down	ENSG00000130653	-1.34857	0.0254	PNPLA7	9q34.3	protein_coding	2.82323	2.63915	1.91012	2.05102	0.981012	1.0336
Down	ENSG00000204866	-1.34434	0.0262	IGFL2	19q13.32	protein_coding	2.95975	2.85369	2.07495	2.39885	1.44442	1.01053
Down	ENSG00000154359	-1.33406	0.000599	LONRF1	8p23.1	protein_coding	3.67173	3.76668	3.61783	3.56627	2.34946	2.29368
Down	ENSG00000247095	-1.33128	0.0195	MIR210HG	11p15.5	lincRNA	2.77051	2.58245	2.0776	1.93902	0.967571	1.05465
Down	ENSG00000186395	-1.3221	0.00117	KRT10	17q21.2	protein_coding	10.064	9.98352	9.8074	9.81164	8.57887	8.61019
Down	ENSG00000167702	-1.31843	0.0984	KIFC2	8q24.3	protein_coding	4.62481	4.19365	3.26491	3.18006	2.4759	2.51896
Down	ENSG00000185189	-1.3079	0.0315	NRBP2	8q24.3	protein_coding	4.19256	4.09277	3.33504	3.35349	2.43219	2.43894
Down	ENSG00000104892	-1.30166	0.0662	KLC3	19q13.32	protein_coding	4.40134	4.05606	3.3276	3.13027	2.44826	2.40606
Down	ENSG00000187017	-1.29265	0.0997	ESPN	1p36.31	protein_coding	3.7414	3.50581	2.49991	2.36433	1.67778	1.79265
Down	ENSG00000139144	-1.29247	0.00234	PIK3C2G	12p12.3	protein_coding	3.85771	3.94478	3.65653	3.61235	2.56857	2.38219
Down	ENSG00000171219	-1.28929	0.0988	CDC42BPG	11q13.1	protein_coding	4.65207	4.2127	3.33578	3.22397	2.4831	2.65058
Down	ANKRD20A12P	-1.28654	0.0192	NA	NANA	NA	2.07979	2.5543	1.67312	1.85719	0.817085	0.692042
Down	ENSG00000104881	-1.28332	0.0317	PPP1R13L	19q13.32	protein_coding	4.84489	4.56516	4.03908	3.88003	2.96587	3.13206
Down	ENSG00000204219	-1.27229	0.00201	TCEA3	1p36.12	protein_coding	4.27879	4.25471	4.09578	3.9347	2.91097	2.82644
Down	ENSG00000196517	-1.27092	0.0273	SLC6A9	1p34.1	protein_coding	3.46477	3.39111	2.65689	2.73842	1.86735	1.7164
Down	ENSG00000134245	-1.26641	0.0274	WNT2B	1p13.2	protein_coding	2.58548	2.64248	1.99242	1.79048	0.936661	1.03595
Down	ENSG00000102934	-1.23632	0.0339	PLLP	16q13	protein_coding	2.74296	2.8628	1.9621	2.11779	1.21755	1.15263
Down	ENSG00000198728	-1.23312	0.00366	LDB1	10q24.32	protein_coding	5.36035	5.38564	5.10737	4.99145	3.91304	4.04312
Down	C5ORF27	-1.22749	0.0292	NA	NANA	NA	1.20844	1.35742	2.02239	1.99196	0.4381	0.397018
Down	ENSG00000124003	-1.21969	0.00073	MOGAT1	2q36.1	protein_coding	1.18414	1.33013	1.33109	1.38499	0.0609961	0.114802
Down	LOC388152	-1.21335	0.0235	NA	NANA	NA	3.15628	2.94299	2.53502	2.30265	1.47452	1.56724
Down	ENSG00000069667	-1.20918	0.00287	RORA	15q22.2	protein_coding	4.26721	4.56131	4.56534	4.68299	3.3176	3.30247
Down	ENSG00000185668	-1.20891	0.0827	POU3F1	1p34.3	protein_coding	3.66369	3.39017	2.42092	2.59797	1.7304	1.88815
Down	ENSG00000167968	-1.2081	0.023	DNASE1L2	16p13.3	protein_coding	2.22348	1.7337	2.55814	2.51223	1.12162	0.975957
Down	NPIPL3	-1.19615	0.017	NA	NANA	NA	5.49012	5.52206	4.99407	4.85078	3.99935	4.03685
Down	ENSG00000101049	-1.1924	0.00126	SGK2	20q13.12	protein_coding	1.81876	1.71865	1.92393	1.91649	0.739339	0.564778
Down	ENSG00000167768	-1.19118	0.00583	KRT1	12q13.13	protein_coding	10.277	10.2824	9.88965	9.86941	8.88175	8.89514
Down	ENSG00000265190	-1.18321	0.0774	ANXA8	10q11.22	protein_coding	3.02206	3.08518	1.96478	2.19828	1.49865	1.27008
Down	ENSG00000104859	-1.18254	0.00963	CLASRP	19q13.32	protein_coding	3.49024	3.60992	3.0326	3.23352	2.04174	2.27632
Down	ENSG00000081760	-1.17919	0.0114	AACS	12q24.31	protein_coding	3.8079	3.48945	3.22573	3.16708	2.22964	2.25705
Down	ENSG00000008441	-1.16956	0.021	NFIX	19p13.13	protein_coding	4.83624	4.66137	4.15416	4.13288	3.22027	3.33294
Down	ENSG00000248643	-1.16819	0.073	RBM14-RBM4	11q13.2	protein_coding	2.70257	1.87249	1.39295	1.74844	0.681612	0.840228
Down	SEPT5-GP1BB	-1.1649	0.00096	NA	NANA	NA	2.59885	2.37198	2.43913	2.42474	1.28064	1.30692
Down	ENSG00000179639	-1.164	0.000987	FCER1A	1q23.2	protein_coding	3.30419	3.31225	3.43615	3.33446	2.28037	2.08516
Down	ENSG00000186480	-1.16229	0.0106	INSIG1	7q36.3	protein_coding	3.38423	3.44348	3.91205	3.87725	2.53126	2.45267
Down	ENSG00000116031	-1.16213	0.00163	CD207	2p13.3	protein_coding	3.7367	3.89684	3.65186	3.89315	2.56842	2.69659
Down	ENSG00000124143	-1.15506	0.0774	ARHGAP40	20q11.23	protein_coding	3.20714	2.92324	2.2176	2.02246	1.42893	1.44618
Down	ENSG00000087266	-1.15228	0.0565	SH3BP2	4p16.3	protein_coding	4.74651	4.50889	3.79611	3.76156	3.03256	3.06941
Down	ENSG00000120708	-1.15197	0.0352	TGFBI	5q31.1	protein_coding	5.83218	5.65066	5.06335	4.98347	4.21894	4.24194
Down	LOC613037	-1.1517	0.0619	NA	NANA	NA	4.991	4.99221	4.14577	4.05302	3.3793	3.40829
Down	ENSG00000104055	-1.15115	0.00167	TGM5	15q15.2	protein_coding	2.33283	2.25258	2.19524	2.16915	1.22338	0.94922
Down	ENSG00000214456	-1.14955	0.00689	PLIN5	19p13.3	protein_coding	2.07607	1.66867	1.69594	1.56109	0.508257	0.693536
Down	ENSG00000143882	-1.14773	0.00314	ATP6V1C2	2p25.1	protein_coding	3.57084	3.4954	3.28653	3.34332	2.13656	2.41603
Down	ENSG00000174738	-1.14147	0.0493	NR1D2	3p24.2	protein_coding	2.60567	2.77429	3.45806	3.5294	1.99437	1.90639
Down	ENSG00000142046	-1.13397	0.00121	TMEM91	19q13.2	protein_coding	3.50507	3.28101	3.3787	3.27845	2.19196	2.26171
Down	GLTSCR2	-1.13377	0.0532	NA	NANA	NA	6.23691	5.99236	5.32693	5.33279	4.43552	4.74143
Down	ENSG00000108352	-1.13044	0.0527	RAPGEFL1	17q21.1	protein_coding	5.20419	5.0743	4.29896	4.33613	3.61096	3.58494
Down	ENSG00000185245	-1.12551	0.00449	GP1BA	17p13.2	protein_coding	1.9314	1.64338	1.53204	1.49879	0.514601	0.537186
Down	ENSG00000134532	-1.12459	0.07	SOX5	12p12.1	protein_coding	2.88116	3.04103	1.98251	2.13567	1.39025	1.38075
Down	ENSG00000261609	-1.11969	0.00216	GAN	16q23.2	protein_coding	3.61416	3.78944	3.4467	3.60802	2.44586	2.54392
Down	ENSG00000091592	-1.11908	0.0425	NLRP1	17p13.2	protein_coding	4.54639	4.30931	3.78873	3.60955	2.97955	2.90928
Down	LOC284412	-1.11781	0.0874	NA	NANA	NA	2.69431	2.94231	2.07884	1.69185	1.16994	1.29809
Down	ENSG00000230453	-1.11269	0.00644	ANKRD18B	9p13.3	protein_coding	1.54324	1.69769	1.24413	1.25358	0.327261	0.316687
Down	2020-09-05	-1.10602	0.0136	NA	NANA	NA	3.9721	3.91068	3.34771	3.60048	2.56477	2.63868
Down	ENSG00000106078	-1.10016	0.00432	COBL	7p12.1	protein_coding	2.98058	2.76944	2.66138	2.53851	1.60241	1.67223
Down	ENSG00000115183	-1.09837	0.00253	TANC1	2q24.2	protein_coding	4.26808	4.23768	4.01858	3.96973	3.01333	3.03697
Down	ENSG00000136155	-1.08712	0.00309	SCEL	13q22.3	protein_coding	4.92376	5.06508	4.71807	4.76539	3.83064	3.73127
Down	ENSG00000114812	-1.08668	0.00143	VIPR1	3p22.1	protein_coding	2.60808	2.51665	2.35646	2.51968	1.35894	1.46814
Down	LOC100132247	-1.08072	0.0137	NA	NANA	NA	5.59027	5.61482	5.18441	5.05465	4.30718	4.25345
Down	ENSG00000065618	-1.07778	0.0729	COL17A1	10q25.1	protein_coding	7.44097	7.25329	6.49775	6.43787	5.83464	5.82474
Down	ENSG00000130208	-1.07226	0.0118	APOC1	19q13.32	protein_coding	3.7695	3.38076	3.35531	3.21215	2.50659	2.20775
Down	LOC284023	-1.07116	0.00104	NA	NANA	NA	3.1991	3.0417	2.98114	3.05334	2.01409	1.98124
Down	ENSG00000176387	-1.06421	0.0315	HSD11B2	16q22.1	protein_coding	2.16169	2.22731	2.93337	2.57629	1.55472	1.2662
Down	ENSG00000164828	-1.06344	0.0185	SUN1	7p22.3	protein_coding	4.99954	4.92459	4.48476	4.39776	3.55235	3.7241
Down	ENSG00000108924	-1.05847	0.0512	HLF	17q22	protein_coding	2.39793	2.42651	3.17951	3.16607	1.79603	1.67203
Down	ENSG00000175066	-1.05814	0.000909	GK5	3q23	protein_coding	2.72987	2.62822	2.80911	2.79015	1.67883	1.68356
Down	ENSG00000054690	-1.05493	0.00146	PLEKHH1	14q24.1	protein_coding	2.70947	2.57458	2.50182	2.46095	1.539	1.47455
Down	ENSG00000135245	-1.0499	0.016	HILPDA	7q32.1	protein_coding	2.71961	2.55515	3.19172	3.00666	1.90068	1.73609
Down	ENSG00000008394	-1.04682	0.0019	MGST1	12p12.3	protein_coding	4.05914	4.23027	4.26689	4.36113	3.17054	3.19454
Down	ENSG00000121671	-1.04562	0.0126	CRY2	11p11.2	protein_coding	3.49786	3.41396	3.02223	2.97131	2.17581	2.18562
Down	ENSG00000213462	-1.0444	0.00772	ERV3-1	7q11.21	protein_coding	3.15561	3.3791	3.64429	3.5575	2.31996	2.45949
Down	ENSG00000109084	-1.03322	0.0242	TMEM97	17q11.2	protein_coding	2.1405	2.46221	2.89362	2.74857	1.52763	1.52838
Down	ENSG00000178445	-1.03282	0.00104	GLDC	9p24.1	protein_coding	2.18522	2.11237	2.2375	2.27851	1.10628	1.23487
Down	ENSG00000172062	-1.0316	0.038	SMN1	5q13.2	protein_coding	1.90589	2.13798	2.71965	2.46187	1.45875	1.09074
Down	ENSG00000205863	-1.0315	0.014	C1QTNF9B	13q12.12	protein_coding	1.38446	1.51993	1.1044	0.995982	0.374554	0.0648267
Down	ENSG00000167880	-1.02777	0.0965	EVPL	17q25.1	protein_coding	5.62094	5.31061	4.5838	4.50996	3.95911	3.998
Down	ENSG00000126464	-1.02315	0.07	PRR12	19q13.33	protein_coding	3.48962	3.13816	2.5037	2.54508	1.83902	1.95296
Down	ENSG00000052802	-1.02093	0.0407	MSMO1	4q32.3	protein_coding	3.52661	3.74569	4.27185	4.31285	3.00885	2.87779
Down	ENSG00000196498	-1.01986	0.0205	NCOR2	12q24.31	protein_coding	3.98896	3.96846	3.46217	3.42907	2.65145	2.73315
Down	ENSG00000174827	-1.01592	0.0154	PDZK1	1q21.1	protein_coding	1.50489	1.59967	1.89306	2.11618	0.761992	0.763072
Down	ENSG00000156076	-1.0156	0.0176	WIF1	12q14.3	protein_coding	1.07696	0.937138	1.51309	1.49433	0.231137	0.248428
