# Supplementary material for: Deciphering the role of IL17RA in psoriasis and chronic mucocutaneous candidiasis: shared pathways and distinct manifestations
Source: Front Immunol. 2025 Jan 20;15:1516408. doi: 10.3389/fimmu.2024.1516408 (PMC11796622; doi:10.3389/fimmu.2024.1516408)
Supplement: Supplementary file 9 [file Table8.xlsx]

## Sheet: Sheet1
7) Supplementary table8: the shared molecules and disease function annotation between psorisis and CMC.
Function Annotation	Disease Category	p-value	# Molecules	Molecules
Psoriasis	Dermatological Diseases and Conditions, Organismal Injury and Abnormalities	2.85e-14	9	FADS2, LTF, MMP1, PI3, S100A7, S100A8, S100A9, SERPINB3, SERPINB4
Inflammatory response	Inflammatory Response	2.86e-06	6	CCL18, LTF, MMP1, S100A7, S100A8, S100A9
Adhesion of granulocytes	Cell-To-Cell Signaling and Interaction, Hematological System Development and Function	1.9e-05	3	LTF, S100A8, S100A9
Chemotaxis of leukocytes	Inflammatory Response, Immune Cell Trafficking, Hematological System Development and Function,Cellular Movement	2.05e-05	4	CCL18, S100A7, S100A8, S100A9
Cell movement of macrophages	Inflammatory Response, Immune Cell Trafficking, Hematological System Development and Function, Cellular Movement	2.21e-05	4	S100A7, S100A8, SERPINB3, SERPINB4
Antifungal response	Inflammatory Response, Humoral Immune Response, Antimicrobial Response	4.02e-05	2	S100A8, S100A9
Chemotaxis of neutrophils	Inflammatory Response,Immune Cell Trafficking, Hematological System Development and Function, Cellular Movement	4.46e-05	3	S100A7, S100A8, S100A9
Migration of keratinocytes	Hair and Skin Development and Function, Cellular Movement	0.000481	2	LTF, MMP1
Lymphocyte migration	Immune Cell Trafficking, Hematological System Development and Function, Cellular Movement	0.00101	3	CCL18, S100A7, SERPINB3
Activation of natural killer cells	Inflammatory Response, Immune Cell Trafficking, Hematological System Development and Function, Cell-To-Cell Signaling and Interaction	0.00148	2	LTF, S100A9
Proliferation of keratinocytes	Tissue Development, Organ Development, Hair and Skin Development and Function, Connective Tissue Development and Function, Cellular Growth and Proliferation, Cellular Development	0.0024		LTF, S100A8
Apoptosis of peripheral blood monocytes	Organismal Injury and Abnormalities, Cell Death and Survival	0.00278	1	S100A8
Killing of Staphylococcus aureus subsp. aureus	Cell Death and Survival	0.00454	1	LTF
Chemotaxis of CD4+ T-lymphocytes	Inflammatory Response, Hematological System Development and Function, Immune Cell Trafficking, Cellular Movement, Cell-mediated Immune Response, Immune Cell Trafficking	0.00479	1	S100A7
Fungal infection	Infectious Diseases	0.039	1	S100A9
